# Supplementary material
Source: PubMed Central journal article supplement (PMC9977741)
Supplement: 41422_2022_771_MOESM4_ESM.pdf [file 41422_2022_771_MOESM4_ESM.pdf]

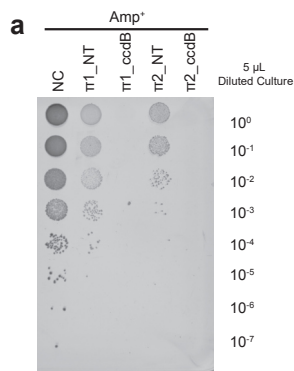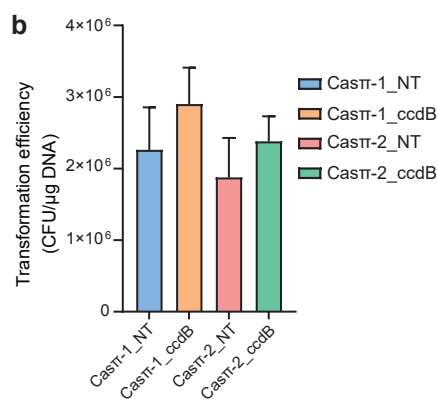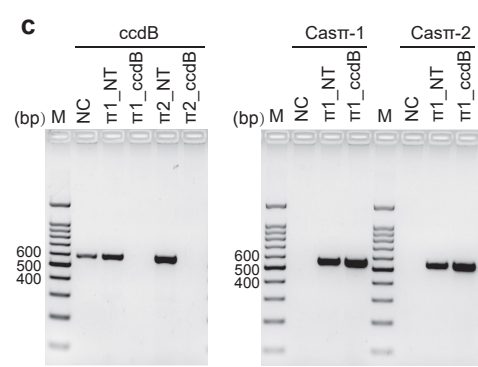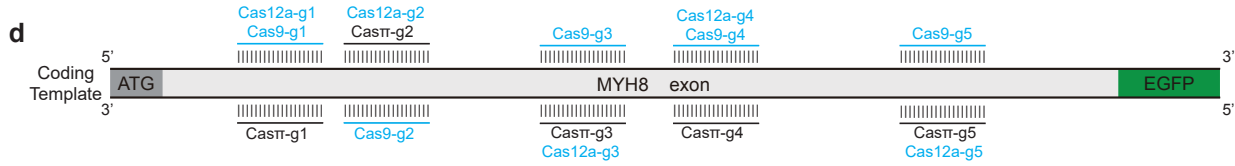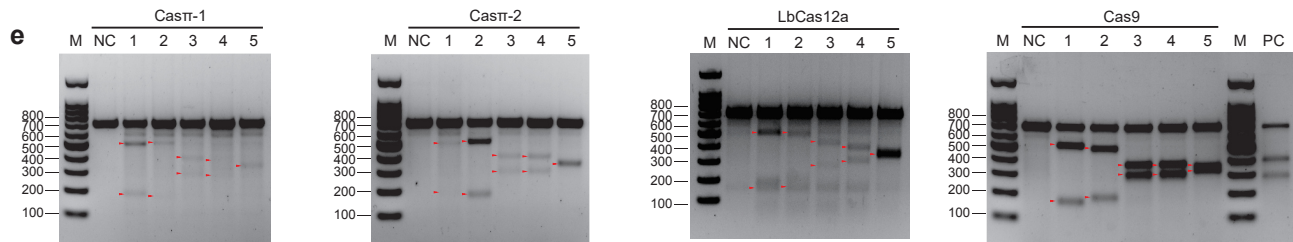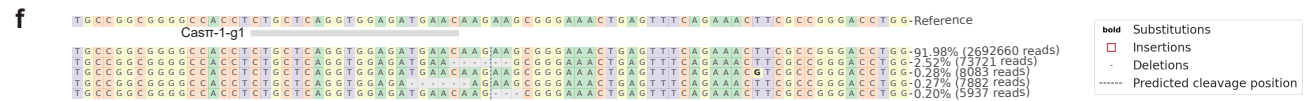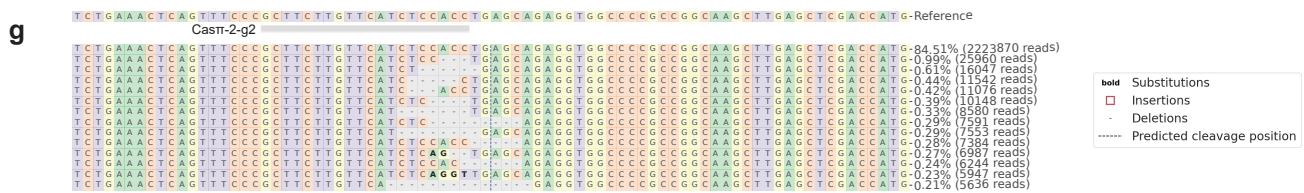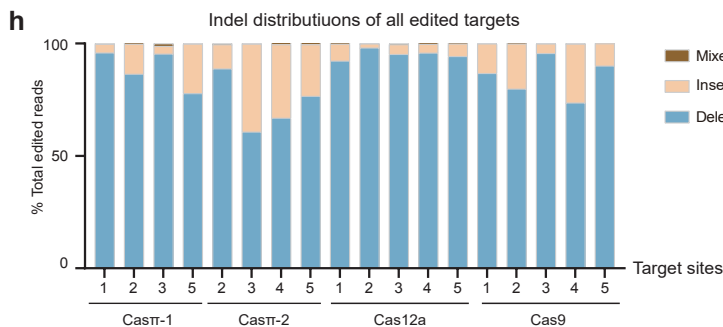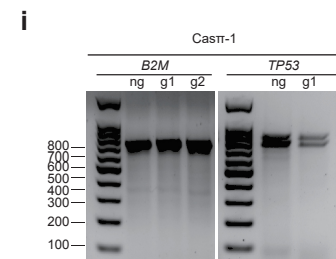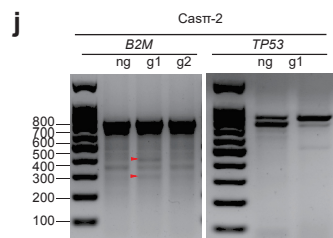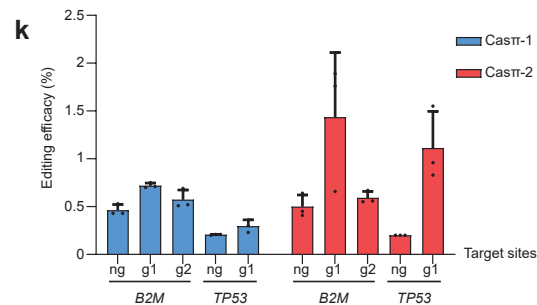

**Fig. S4 Cas $\pi$  mediated gene manipulation in prokaryotic and eukaryotic cells.**

- (a) Bacteria survival result on LB-Amp<sup>+</sup> agar plates. (NT, plasmid with Cas $\pi$  and non-target sgRNA; *ccdB*, plasmid with Cas $\pi$  and sgRNA targeting *ccdB* gene).
- (b) Transformation efficiency of Cas $\pi$  plasmids validated on LB-Strep<sup>+</sup> agar plates (n=3 each, mean  $\pm$  SD).
- (c) Left panel, PCR detection of *ccdB* plasmids in edited cells. The two PCR primers respectively locates at the cleavage-site upstream and downstream. Right panel, PCR detection of Cas $\pi$  plasmids in edited cells.
- (d) Distribution of targeting sites across *MYH8* exon for Cas $\pi$ , Cas12a and Cas9 effectors.
- (e) T7E1 cleavage on the re-annealed target amplified from edited genome of Cas $\pi$ -1, Cas $\pi$ -2, Cas12a and Cas9. Cleavage products were indicated by red arrows. PC indicates the positive control offered in the manufacture kit for T7E1 assay.
- (f) Summary of indels generated by Cas $\pi$ -1 on the MYH8-target site1. Only indels with frequencies  $\geq$  0.2% of the total reads are shown.
- (g) Summary of indels generated by Cas $\pi$ -2 on the MYH8-target site2. Only indels with frequencies  $\geq$  0.2% of the total reads are shown.
- (h) INDEL distributions of all five targets by Cas effectors analyzed by NGS of the MYH8 target (Mixed means insertion and deletion, only targets with editing efficacies  $\geq$  1% are shown).
- (i) T7E1 cleavage on the re-annealed target amplified from edited genome of Cas $\pi$ -1 on *B2M* and *TP53* (ng means non-target sgRNA; n=3 each, mean  $\pm$  SD).
- (j) T7E1 cleavage on the re-annealed target amplified from edited genome of Cas $\pi$ -2 on *B2M* and *TP53*. Cleavage products were indicated by red arrows (n=3 each, mean  $\pm$  SD).
- (k) Editing efficacies determined by NGS for 3 more targets mediated by Cas $\pi$ -1 and Cas $\pi$ -2 (n=3 each, mean  $\pm$  SD).
