# Supplementary material
Source: PubMed Central journal article supplement (PMC9977741)
Supplement: 41422_2022_771_MOESM8_ESM.pdf [file 41422_2022_771_MOESM8_ESM.pdf]

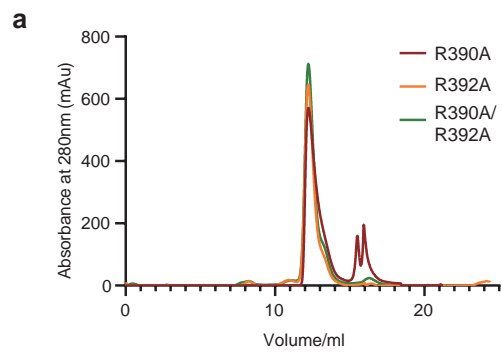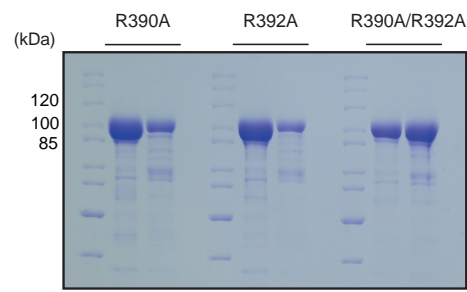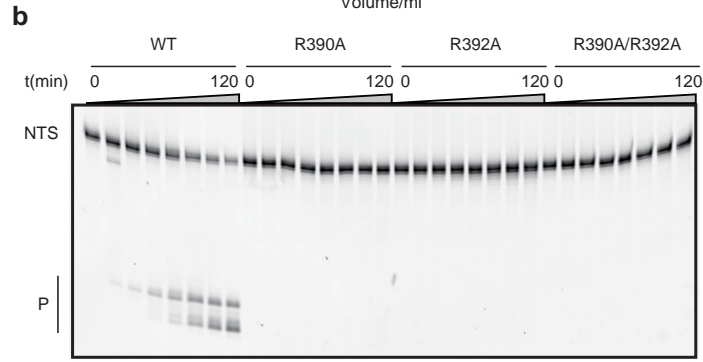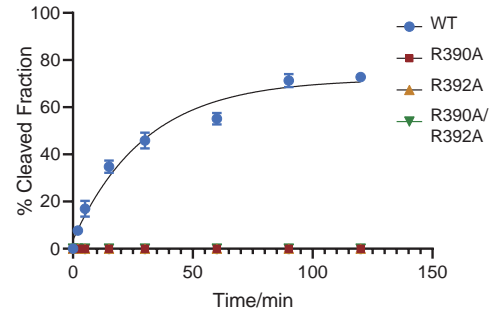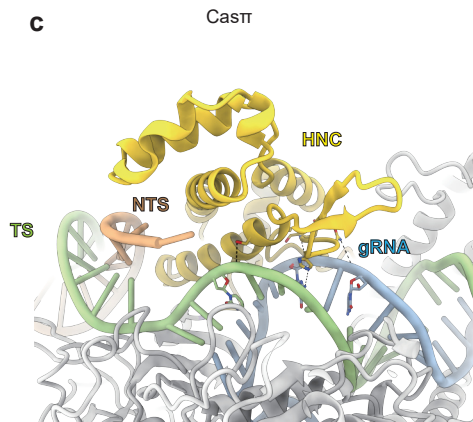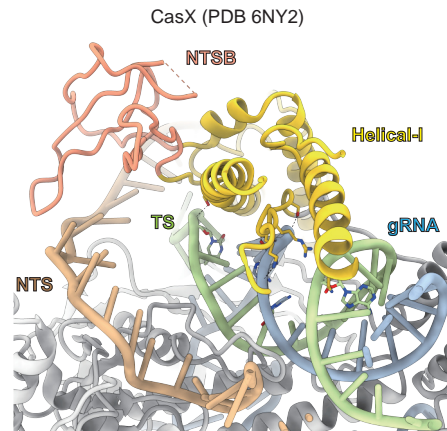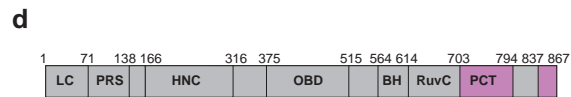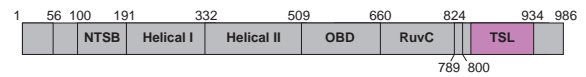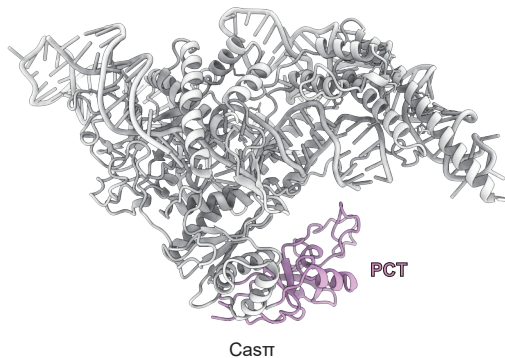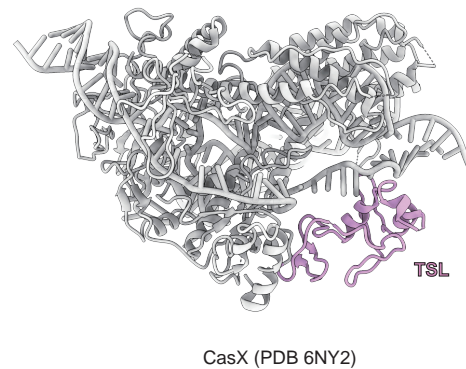

**Fig. S8 Local analysis of OBD, HNC and PCT domains in Cas $\pi$  protein.**

(a) Left, purification of three Cas $\pi$  mutants (R390A, R392A and R390A/R392A). The SEC curves were aligned referring to the injection volume. Right, the peak fractions were analyzed by SDS-PAGE.

(b) Left, *in vitro* dsDNA cleavage by wild type Cas $\pi$  (WT) and Cas $\pi$  mutants revealed by denaturing PAGE. Right, the plot of dsDNA substrate cleavage efficiency by WT and mutants of Cas $\pi$  (n=3 each; mean  $\pm$  SD).

(c) Structural comparison between Cas $\pi$  HNC domain and the NTSB to Helical-I region of CasX.

(d) Comparison between Cas $\pi$  PCT domain and CasX TSL domain. Both the primary and 3D location of each domain in the entire protein were presented.
