# Supplementary material
Source: PubMed Central journal article supplement (PMC9977741)
Supplement: 41422_2022_771_MOESM10_ESM.pdf [file 41422_2022_771_MOESM10_ESM.pdf]

**a**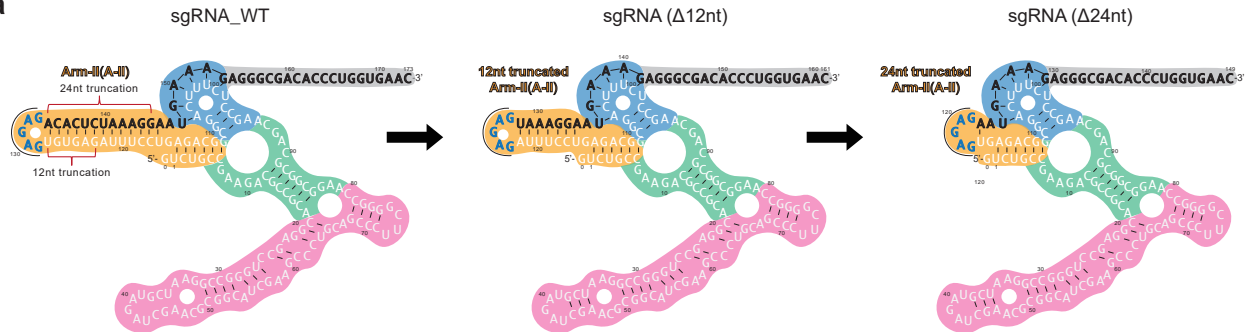**b**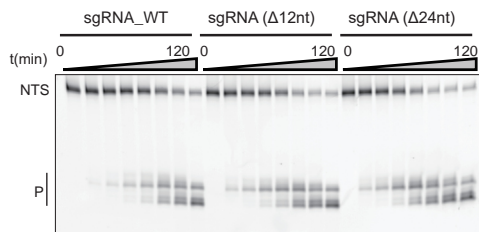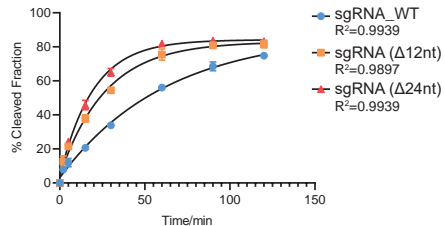

**Fig. S10 sgRNA engineering on the A-II region.**

(a) Left, the naive version of the sgRNA (sgRNA\_WT); Middle, the secondary structure of sgRNA ( $\Delta$ 12nt) with 12-nt truncation on the A-II region; Right, the secondary structure of sgRNA ( $\Delta$ 24nt) with 24-nt truncation on the A-II region.

(b) Left, *In vitro* dsDNA cleavage by Cas $\pi$ -1 effector using different sgRNAs; Right, the plot of cleavage efficiency (n=3; mean  $\pm$  SD), The rate constant k values for Cas $\pi$ -1 with sgRNA\_WT, sgRNA ( $\Delta$ 12nt) and sgRNA ( $\Delta$ 24nt) are 0.0165, 0.03702 and 0.05125 (fraction/minute).
