# Supplementary material
Source: PubMed Central journal article supplement (PMC9977741)
Supplement: 41422_2022_771_MOESM11_ESM.pdf [file 41422_2022_771_MOESM11_ESM.pdf]

**a**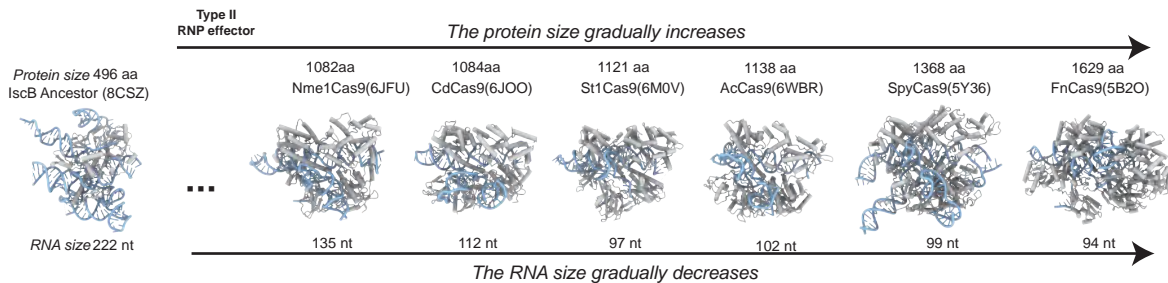**b**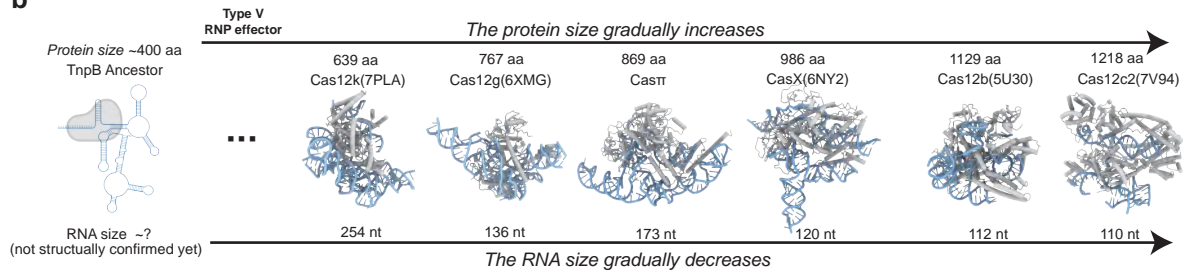**c**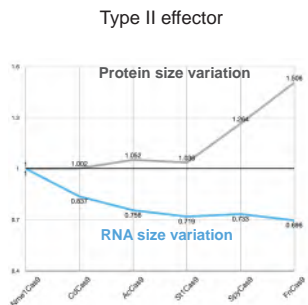**d**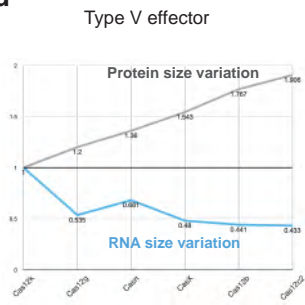**e**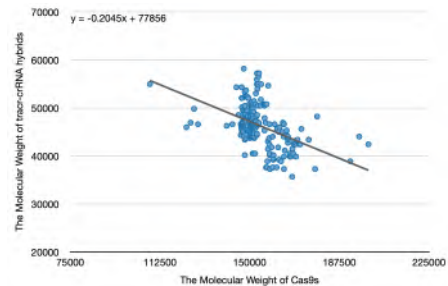

**Fig. S11 Molecular size analysis for the gRNA and protein in CRISPR effectors.**

(a) The summary of the RNA and protein size in type II CRISPR effectors comprising of a protein monomer and tracr-crRNA hybrid. The atomic model each effector was shown in the same size scale. The protein part was colored in grey and RNA part in cyan. The number of amino acids (aa) in each protein, the length of each RNA (nt), and the PDB code for each structure were labeled, accordingly. The structure of ancestral IscB effector was shown in the left panel.

(b) The summary of the RNA and protein size in type V CRISPR effectors comprising of a protein monomer and tracr-crRNA hybrid. The cartoon of ancestral TnpB effector was presented in the left panel.

(c) The RNA- and protein-size variation trend for type II effectors referring to Nme1Cas9 effector (pdb 6JFU). The variation value (y axis) for the protein in each effector equals its protein size divided by Nme1Cas9 protein size. The variation value for the RNA in each effector equals its RNA size divided by NmeCas9 RNA size. The variation value  $>1$  suggests a size increase compared to NmeCas9, and variation value  $<1$  suggests a size decrease.

(d) The RNA- and protein-size variation trend for type V effectors referring to Cas12k effector (pdb 7PLA).

(e) The correlation analysis of the protein length and the tracr-crRNA molecular weights within 383 bioinformatically identified Cas9 effectors (Cas9's molecular weight is between 100,000-200,000 Da and tracr-crRNA's molecular weight is between 30,000-60,000 Da). The Y axis represents the tracr-crRNA molecular weights and the X axis indicates the molecular weight of Cas9 proteins in each effector.
