# Supplementary material
Source: PubMed Central journal article supplement (PMC9977741)
Supplement: 41422_2022_771_MOESM12_ESM.pdf [file 41422_2022_771_MOESM12_ESM.pdf]

**Table S1 Protein and gRNA sequences of Cas $\pi$  systems.**

| ID                   | Description                                       | Sequences (N terminal – C terminal for protein; 5'-3' for nucleotides)                                                                                                                                                                                                                                                                                                                                                                                                                                                                                                                                                                                                                                                                                                                                                                                                                                                                                                                                                                                                                                                                                                                                                                                                                                                          |
|----------------------|---------------------------------------------------|---------------------------------------------------------------------------------------------------------------------------------------------------------------------------------------------------------------------------------------------------------------------------------------------------------------------------------------------------------------------------------------------------------------------------------------------------------------------------------------------------------------------------------------------------------------------------------------------------------------------------------------------------------------------------------------------------------------------------------------------------------------------------------------------------------------------------------------------------------------------------------------------------------------------------------------------------------------------------------------------------------------------------------------------------------------------------------------------------------------------------------------------------------------------------------------------------------------------------------------------------------------------------------------------------------------------------------|
| Cas $\pi$ -1-Protein | Native protein sequence of Cas $\pi$ -1 nuclease. | <p>MAKATKEVKSKRVEALRQVAYQRLERLERKA<br/>           QKIGAHLRKP GKAADLQSLHYLLHKVEVEYHD<br/>           IARNLEKDPTWTPKPKMRREKRAIVPESGPAAP<br/>           LPTTAKGEPGRPANRHIPPPVPLDSARIPEDQQS<br/>           MGQGSGRSWCSAPFVEVKLPPTQWSNVREK<br/>           LLKFRIEDDADIVRRWAEAKFGSIETARDGLRA<br/>           SAEIGTSPDVWRSFISRAISNGKKDFEPLLSLDD<br/>           DELTADATAAERVVRRWHQIDWVGRMLDSILET<br/>           VPSGVSKDTRSRVESRLKTFHSSVNSFELKKR<br/>           KDGTVERKRKHTNPQFPYLSAVSIDPDVVT<br/>           MEAVELLQMPEERFAKDPNDANGRMRLRVL<br/>           QAELGKARREALGRRGEKAPPWGRKVFRTGT<br/>           TRKREACLVDKEAQADGLYFALVMSGGPKI<br/>           DDKRFVYMDGQPLQSDWQLHNGVAGKAKSC<br/>           RAMPLILKHDFLRWYHRHIKNHDVNAPLEKRC<br/>           VHTTTQFVFEVPEDEKKGLQPRLFIRPVFKFYDP<br/>           VYEVPSHSIDKKPDCRYLIGIDRGVNYPYRAA<br/>           VYDCETNSIADKFVDGRKADWERIRNELAYH<br/>           QRRDLLRNSRASSAAIQREIRAIARIRKRERGL<br/>           NKVETVESIARLVDWAEENLGKCNFCVLEDL<br/>           SSNLSLGRNNRVKHIAAIKEALINQMRKRGYR<br/>           FKKSGKVDGVREESAWYTSAPVPSGWVAKKE<br/>           EVDGAWKADKTRPLARKIGSYCCCEEIDGLHL<br/>           RGVKGLGAKRLVLQSDDPSAPTRRRGFGSE<br/>           LFWDPYCTELCGHAFPGVVLDAFIGAFNIAL<br/>           RPLVREELGKKAKAVDLADRHQTLNPTVALRC<br/>           GVTAYEFVEVGGDPRGGLRKILLNPAEAVI*</p> |
| Cas $\pi$ -2-Protein | Native protein sequence of Cas $\pi$ -2 nuclease. | <p>MGKNRSSSSDLSPLERSLRKVGENRLERLRVRE<br/>           EKIRKHIEQHPRGKNDHQALHFLHQIEVERND<br/>           LYRNLKDPEYVPAKQRRERRQINVAKPPTRP<br/>           KKEKGPQPESTKYVIRPPVPGKNLPAFASKYEA<br/>           RDTRDDSYQDGRSWTSAPYVEVELPILGADKV<br/>           IQKLMKFVQKDESRVIRDWATKTYSSIEAAREA<br/>           LLVGAQVSEDVSVWRGLLAETKNAQNFAALS<br/>           DDQIEAAMSKEAKGADLRPRRAALLVAQRHW<br/>           VDQTVKAIKESAPSGVDKDTLDRRLRAGLRF<br/>           HTAANSKGHTNPQFPYLTAEKPVVPMESVVQS<br/>           VLAFLDDPDDQRYTKDKEDDKRHRVTVLQK<br/>           ELGKARPRKRLQLTPKWAGRPTVKGITISKRR<br/>           DAALVWDTSKENGLCLALPIGGMPKIDVEQFI</p>                                                                                                                                                                                                                                                                                                                                                                                                                                                                                                                                                                                                                                                                                            |

|                       |                                                              |                                                                                                                                                                                                                                                                                                                                                                                                                                                                                                                                                                                                                                                                                                                                                                                                                                                                                                                                                                                                                                                                                                 |
|-----------------------|--------------------------------------------------------------|-------------------------------------------------------------------------------------------------------------------------------------------------------------------------------------------------------------------------------------------------------------------------------------------------------------------------------------------------------------------------------------------------------------------------------------------------------------------------------------------------------------------------------------------------------------------------------------------------------------------------------------------------------------------------------------------------------------------------------------------------------------------------------------------------------------------------------------------------------------------------------------------------------------------------------------------------------------------------------------------------------------------------------------------------------------------------------------------------|
|                       |                                                              | <p>YQDGTSLSDCQIASKTTKGAACAVLPLKPK<br/> HDFLRWFTKHVENHNPDAPLERRCLHNTTQFV<br/> IVDPEGPRPRLFVRPVFKFYDPGKTVPNHETW<br/> KKPDCRYLVGIDRGINYVLRAVVVDTEEKKVI<br/> ADIGLPGRKHEWRMIRDEIAYHQMRDLARNT<br/> GKHASVVAKHVRALALARKKDRALGKFATVE<br/> AVAELVKKCEQDYGSGNYCFVLEDLDMGAM<br/> NLKRNNRVKHMAVMEEALVNQMRKQGYAYD<br/> GRRGRVDGVRHEGAWYTSQVSPFGWWAKRD<br/> EVEEA WKRDKTRPIGRKVG N WYEMPEPGQDG<br/> DRPDTYRKGYWSKPKNAEGKPYGRNRFSVEP<br/> GDEKPD AERRFCWGSELFWDPNVKSFKGKEFP<br/> EGVVL DAD FVGALNIALRPLVNDGQGKGFKAE<br/> DMAREHTILNPQFKIACQIPVYEFVEEDGDKW<br/> AALRRIML*</p>                                                                                                                                                                                                                                                                                                                                                                                                                                                                                                                                  |
| <p>Casp-3-Protein</p> | <p>Native protein<br/> sequence of Casp-3<br/> nuclease.</p> | <p>MGKNRSSSSDLSQLERSLRKVG ENRLERLRVR<br/> GQKIRKHL EQHPRGKNDHQALHFLHQIEVER<br/> NDLYRNLKDPEYV PKPAKR RRRERRQINVAQPP<br/> TRPTKSVGPKPAPTTYVIPRPEPGRDLPAFASRY<br/> KASDSRGEDDQDGRSWTAAPFVEVELPIQIAG<br/> KILEKLRKYVQKDEREIVREWAVKTYGSIEAA<br/> REPLLIGAQVSEDVSVWRGLLAETKNAQDFAA<br/> LSDDQIEAAMSKEAKGSDLRPRRAALLVAQRH<br/> WVDQTVKAIKESAPKGVDKDTLDRRLRAGLR<br/> GFHTAANS GKHTNPQFPYLTPKEAKVPLESVV<br/> NQVLEFLDDADDQRYVQVKVDDKKRHRVSHL<br/> QKELGKARPRKRELELQRPKWAGRPTVQGTISK<br/> RRDAALVWDTSK KENGLCLALPLGGLQKIDVE<br/> RFIYQDGTSLSDCQIASKTSKKG AACALMPLK<br/> PKHDFLRWYTKHVENHNADAPLERRCLHNTT<br/> QFVIVDPEGQR PRLFIRPVFKFYDPGKAVPNTH<br/> ETWKKPDCRYLVGIDRGINYVLRAVVVDIEKK<br/> EVIADIHLQGD KHKWRMIRDEIAYHQMRDLA<br/> SNTGKHPSVVARHVRALALARKKDRALGRFTT<br/> VKAVADIVMQCENDY GSGNYCFVLEDLDMGK<br/> MNLKRNNRVKHMAVMKEALVNQMRKRGYA<br/> YDGRRGRADGVRYEGAWYTSQVSPFGWWAK<br/> REEVEEA WKKDTSRPIGRKVG N WYEMPDPNE<br/> EGKRS DVYRKGCWKKPQNASGKPYGRNRF CV<br/> EPGDEKPD AQRRFSWGSELFWDPNVKSFKGKE<br/> FP EGVVL DAD FVGALNIALRPLVNDGQGRGFT<br/> ADKMAEAHTRLNPQFEIVCKIPVYEFIEEHGDK<br/> RAKLRRIVL*</p> |

|                              |                                                                |                                                                                                                                                                                                                                                                                                                                                                                                                                                                                                                                                                                                                                                                                                                                                                                                                                                                                                                                                                                    |
|------------------------------|----------------------------------------------------------------|------------------------------------------------------------------------------------------------------------------------------------------------------------------------------------------------------------------------------------------------------------------------------------------------------------------------------------------------------------------------------------------------------------------------------------------------------------------------------------------------------------------------------------------------------------------------------------------------------------------------------------------------------------------------------------------------------------------------------------------------------------------------------------------------------------------------------------------------------------------------------------------------------------------------------------------------------------------------------------|
| Cas $\pi$ -4-Protein         | Native protein sequence of Cas $\pi$ -4 nuclease.              | MPKKTSTVALSPRDIRLRELGEKRLQRLRQREE<br>KIRRHLESERGRDRDFQSLHFLHKKIEVERNDLY<br>RNLYQNEGHEHYVPKPGKTKHRKELSLPSTELP<br>SPPDEKKGPRPKKSRYVIPQVPGINLPRINRF<br>GKSDQKSESDQEGRFWTSAPFIEVELPMLNAH<br>RVIKALMRFVQKDERSVVRTWAVTKFGSIEAA<br>REVLLAGALLQREPEIMRGFLQNIDPWGSLDE<br>ELIRDEKAWRTVKLLAQKNWVDQIAKSIKDSA<br>PKGVDKDTLDRRLRSLKAFHSAANSKGHTNP<br>QFPYLTSEKPSANFESVVDSVLEFLDLEDKDRY<br>TIKVDKRRHRVTALQKELGQAKPRVRLEQE<br>RSRWAGHSYLQGTITRKRQASLVWDGHRTE<br>GLALAIPLDGMKIDVQRYMYQDGTSLSDRQI<br>TSKTKSEGKDCALMPLRFKHAFLRWYTKHVE<br>NHVAEAPLERRCIHNTTQFVIVDPEGKHPRLFIR<br>PVFKFYDSNKTIQNSNAPWCKPQCRYLIGIDRG<br>INYVLRAVVVDTEEKAVIDDIPGRKREWRAI<br>RQEIAFYQMRDLSKSAQERNRYVVALAKARR<br>KDRSLGKTETVEAVAKLVQNCSERFEGGNYCF<br>VLENLELGALNLKRNNRVKHLASMEEALYQM<br>RKRGYFYNSRNRVDGVRWEAARYTSQVSPF<br>GWWAKRDEVEKAKKQDKSMAIGRKIGEGYEG<br>PQDDEIESHSTIYRQGRWMKLRNEEGKAYGRS<br>RFVVQPEDLDPAQPRRFSWGSELFWDYPYQKEF<br>KGKSFSQGVVLDADFGALNIALRPLVNDGKG<br>KGFTTAMMAEAHVKLNPTFEIRCKIPVYEFIAE<br>NDNSRAALRRIVI* |
| Cas $\pi$ -1-Repeat          | Native repeat sequence of CRISPR-Cas $\pi$ -1 system.          | GGCGCAGGACAAAATGCACACTCTAAAGGA<br>ATGAAAG                                                                                                                                                                                                                                                                                                                                                                                                                                                                                                                                                                                                                                                                                                                                                                                                                                                                                                                                          |
| Cas $\pi$ -2-Repeat          | Native repeat sequence of CRISPR-Cas $\pi$ -2 system.          | GTCGCAGGGGATCAAGAACGCTCTTAGGGAA<br>TGAAAG                                                                                                                                                                                                                                                                                                                                                                                                                                                                                                                                                                                                                                                                                                                                                                                                                                                                                                                                          |
| Cas $\pi$ -3-Repeat          | Native repeat sequence of CRISPR-Cas $\pi$ -3 system.          | GTCGCAGGGGATCAAGAACGCTCTTAGGGAA<br>TGAAAG                                                                                                                                                                                                                                                                                                                                                                                                                                                                                                                                                                                                                                                                                                                                                                                                                                                                                                                                          |
| Cas $\pi$ -4-Repeat          | Native repeat sequence of CRISPR-Cas $\pi$ -4 system.          | GTCGCATGAGGCGAGAAGCACTCTTAGGGAA<br>TGAAAG                                                                                                                                                                                                                                                                                                                                                                                                                                                                                                                                                                                                                                                                                                                                                                                                                                                                                                                                          |
| Cas $\pi$ -1-tracrRNA-region | Native tracrRNA region sequence of CRISPR-Cas $\pi$ -1 system. | TCTGCCGAAGACGCCGACGGAGCCTGGGCC<br>GGAATCGTAGATCGAACGCGGCATCGAAGCC<br>CTGCAGCCCTTCGGGGCCAAGGCGGCGCAGC<br>AAGCCTCTTTCAGGCGGCAGAGTCCTTTAGA<br>GTGT                                                                                                                                                                                                                                                                                                                                                                                                                                                                                                                                                                                                                                                                                                                                                                                                                                    |

|                              |                                                                |                                                                                                                                          |
|------------------------------|----------------------------------------------------------------|------------------------------------------------------------------------------------------------------------------------------------------|
| Cas $\pi$ -2-tracrRNA-region | Native tracrRNA region sequence of CRISPR-Cas $\pi$ -2 system. | GTCTCGACTATGCCGTACCACTAGACCGAGC<br>CTACACGGCACGCGGTCATAGCGTTAACCAA<br>GGCGTGGTGACAAGCCTCTTTCAGGCGTCGG<br>AACTTAAGAGCGTT                  |
| Cas $\pi$ -3-tracrRNA-region | Native tracrRNA region sequence of CRISPR-Cas $\pi$ -3 system. | CTACACTAAGCCTAAACGGCACGAGCGATAG<br>CCCTGCGGGGATTCCCCAAAGCCCGTACGAC<br>AAGCCTCTTTCAGGCGTCGGACACTTAAGAG<br>CGTTAG                          |
| Cas $\pi$ -4-tracrRNA-region | Native tracrRNA region sequence of CRISPR-Cas $\pi$ -4 system. | GTTCCATCTCGATGCGGAACGGATACTACGC<br>TGTAGTCTATACGACACGAGTGATAGCCCTG<br>CGGGTTTCGCCCCTAAGTCCGTATGACAAGC<br>CTCTTTCAGGCGGTGGACTTCTAAGAGTGCT |
