# Supplementary material
Source: PubMed Central journal article supplement (PMC9977741)
Supplement: 41422_2022_771_MOESM13_ESM.pdf [file 41422_2022_771_MOESM13_ESM.pdf]

**Table S2 Native genome sequences of the four CRISPR-Cas $\pi$  cassettes.**

| Name                         | Description                                                                                                       | Sequence (5'-3')                                                                                                                                                                                                                                                                                                                                                                                                                                                                                                                                                                                                                                                                                                                                                                                                                                                                                                                                                                                                                                                                                                                                                                                                                                                                                                                                                                                                                                                                                                                                                                                                                                                                                      |
|------------------------------|-------------------------------------------------------------------------------------------------------------------|-------------------------------------------------------------------------------------------------------------------------------------------------------------------------------------------------------------------------------------------------------------------------------------------------------------------------------------------------------------------------------------------------------------------------------------------------------------------------------------------------------------------------------------------------------------------------------------------------------------------------------------------------------------------------------------------------------------------------------------------------------------------------------------------------------------------------------------------------------------------------------------------------------------------------------------------------------------------------------------------------------------------------------------------------------------------------------------------------------------------------------------------------------------------------------------------------------------------------------------------------------------------------------------------------------------------------------------------------------------------------------------------------------------------------------------------------------------------------------------------------------------------------------------------------------------------------------------------------------------------------------------------------------------------------------------------------------|
| CRISPR-Cas $\pi$ -1 cassette | DNA nucleotides sequence of CRISPR-Cas $\pi$ -1 cassette from <i>Cas<math>\pi</math></i> gene to the last repeat. | ATGGCGAAGGCAACCAAAGAAGTCAAGTCGAAGCG<br>CGTGGAAGCGTTGCGGCAGGTGGCGTATCAACGGCT<br>GGAACGCCTCGAGCGGAAGGCTCAGAAGATCGGAG<br>CGCATCTGCGCAAGCCGGGAAAAGCCGCTGACCTCC<br>AATCACTCCATTATCTTCTTACAAGGTCTGAAGTCGA<br>ATATCACGATATCGCAAGGAACCTGGAGAAGGACCC<br>GACTTGGACACCAAACCGAAAATGCGACGAGAGA<br>AGCGTGCCATCGTGCCGGAGTCCGGCCCCGGCTGCGC<br>CCCTCCCGACCACGGCAAAGGGTGAGCCGGGTAGAC<br>CGGCAAACCGTCATATTCCGCCACCAGTGCCGCTCG<br>ATTCAGCAAGGATCCCCGAAGACCAACAGTCGATGG<br>GCCAAGGAAGCGGGGGGAGGAGTTGGTGTCTGCGC<br>CTTTCGTTGAGGTGAAGTTACCGCCGACTCAATGGTC<br>GAATGTCCGGGAGAAGCTTCTGAAATTCCGAATTGA<br>GGACGACGCCGACATCGTCAGGCGGTGGGCCGAGGC<br>CAAGTTCGGAAGCATCGAGACGGCGCGCGATGGATT<br>ACGTGCGAGCGCAGAGATCGGAACGAGCCCGGATGT<br>CTGGCGTTCCTTCATCAGCCGCGCGATCTCGAACGGC<br>AAGAAGGACTTTGAGCCACTTCTCTCGTTGGACGAT<br>GACGAATTGACCGCGGATGCAACAGCCGAGCGCGTT<br>GTGCGTCCGTGGCATCAGATTGACTGGGTGGGCCGA<br>ATGCTCGACTCCATCCTGGAAACCGTCCCGTCGGGG<br>GTCTCGAAAGACACGTTTCGAAGCAGGGTCGAATCG<br>CGTCTCAAGACGTTTCACTCGTCTGTGAACAGCTTCG<br>AGCTCAAGAAGAGGAAGGACGGTACGGTTCGAGCGC<br>AAGCGGAAGCACACCAACCCGCAGTTTCCGTAATTG<br>TCACCGAGCGCAGTGAGCATCGATCCTGATGTTGTG<br>ACTATGGAGGCGGTGCAACTGCTCCAGATGCAGCCC<br>GAGGAACGCTTTGCAAAGGACCCGAACGATGCGAAT<br>GGCAGAATGAGGCTGAGGGTTTTGCAGGCGGAACTC<br>GGCAAAGCACGACGCGAGGCTCTGGGTCCGGCGGGGC<br>GAGAAGGCCCCGCCGTGGAGTGGCCGCAAGGTCTTT<br>CGCGGAACCACGACCAGGAAGAGGGGAAGCGTGCCT<br>GGTTTGGGACAAAGAGGCACAAGCGGATGGACTTTA<br>CTTCGCGCTCGTGATGTCCGGGCGGACCAAGATCGA<br>CGACAAACGTTTTGTCTACATGGACGGTCAGCCGCT<br>ACAAAGCGATTGGCAACTGCACAACGGAGTGGCCGG<br>TAAGGCAAAGTCATGCAGGGCGATGCCTCTCATTTT<br>GAAGCATGACTTCTGCGGTGGTACCACCGCCACAT<br>TAAGAACCACGACGTCATGCTCCCCTCGAAAAGCG<br>GTGCGTTCACACGACGACCCAGTTCGTTTTCTGTTGAG |

|  |  |                                                                                                                                                                                                                                                                                                                                                                                                                                                                                                                                                                                                                                                                                                                                                                                                                                                                                                                                                                                                                                                                                                                                                                                                                                                                                                                                                                                                                                                                                                                                                                                                                                                                                                                                                                                                                         |
|--|--|-------------------------------------------------------------------------------------------------------------------------------------------------------------------------------------------------------------------------------------------------------------------------------------------------------------------------------------------------------------------------------------------------------------------------------------------------------------------------------------------------------------------------------------------------------------------------------------------------------------------------------------------------------------------------------------------------------------------------------------------------------------------------------------------------------------------------------------------------------------------------------------------------------------------------------------------------------------------------------------------------------------------------------------------------------------------------------------------------------------------------------------------------------------------------------------------------------------------------------------------------------------------------------------------------------------------------------------------------------------------------------------------------------------------------------------------------------------------------------------------------------------------------------------------------------------------------------------------------------------------------------------------------------------------------------------------------------------------------------------------------------------------------------------------------------------------------|
|  |  | CCGGACGAAAAGAAGGGCCTTCAGCCCCGGCTGTT<br>ATCAGACCCGTATTCAAGTTCTACGATCCGGTCTATG<br>AAGTGCCGGATAGCCACTCGATTGACAAGAAGCCGG<br>ACTGCCGATATTTGATCGGAATTGACCGAGGCGTTA<br>ACTACCCCTATCGTGCCGCAGTATACGATTGCGAGA<br>CAAACCTCCATAATCGCCGACAAGTTCGTGGACGGAC<br>GAAAGGCAGATTGGGAGCGGATACGAAATGAACTC<br>GCATACCACCAGCGGCGACGTGACCTCTGCGCAAC<br>TCGCGTGCCTCTTCCGCCCAATACAGCGAGAGATTC<br>GAGCCATTGCACGGATTTCGCAAGAGGGAGCGTGGGC<br>TGAACAAAGTCGAGACGGTCGAGAGCATCGCGCGGC<br>TCGTGCGACTGGGCGGAAGAGAATCTCGGGAAGTGCA<br>ATTACTGCTTCGTTCTCGAAGACCTTTCTTCAAACCT<br>GAATCTGGGGCGAAACAACAGGGTCAAGCACATTGC<br>CGCGATCAAGGAGGCGCTGATCAACCAGATGCGCAA<br>GCGCGGATATCGTTTCAAAAAGAGCGGGAAAGTTGA<br>CGGCGTGCGAGAGGAGTCCGCGTGGTACACGAGTGC<br>CGTTGCGCCATCCGGTTGGTGGGCGAAGAAGGAAGA<br>AGTGGACGGGGCCTGGAAAGCGGACAAGACGCGGC<br>CATTGGCGAGAAAGATCGGCAGTTACTATTGCTGCG<br>AAGAAATCGACGGACTCCATTTGCGCGGCGTGCTGA<br>AGGGGCTCGGAAGGGCGAAGCGACTCGTTCTTCAA<br>GCGACGACCCATCCGCGCCGACTCGCAGACGAGGGT<br>TTGGATCAGAGTTGTTCTGGGACCCCTATTGCACCGA<br>ACTCTGCGGCCACGCTTTCCCGCAAGGCGTCGTA<br>GACGCAGACTTCATCGGCGCCTTCAATATTGCGTGC<br>GACCGCTGGTGAGGGAGGAACTTGGGAAGAAGGCG<br>AAGGCCGTGGACCTGGCCGACAGGCACCAGACGCTC<br>AATCCGACGGTTGCCCTCCGATGCGGCGTAACGGCG<br>TACGAGTTCGTCGAAGTCGGGGGCGATCCCCGGGGC<br>GGTCTCCGAAAATCTTGCTCAATCCCGCAGAGGCC<br>GTGATATAATTTGAATGTGCTCTGCCGAAGACGCCG<br>CACGGAGCCTGGGCCGGAATCGTAGATCGAACGCGG<br>CATCGAAGCCCTGCAGCCCTTCGGGGCCAAGGCGGC<br>GCAGCAAGCCTCTTTCAGGCGGCAGAGTCCTTTAGA<br>GTGTAACGAGGGCCCCCAGGAACGGGGGCCAGCCA<br>TCTCCAGGGAAGGGACAGAGGAGGTGGATAGTGAA<br>GTACGAATACGTCGAGACATTCGGGTTCGGCGTTCA<br>AAAGCACTCCGAGCGACTTGTCGTGTCGGAGCCTTC<br>CGGCGAAGGAGGGCAGAGAACAAGAGGCAGGTGC<br>CCGCTCTACACCTGGACCACCTGCTGATCGGCTCACG<br>CGGCGTCAGCATTTCGTGCGACGCTCTCGAACTCTGC<br>TGCGAACGAGGCATTCCCGTCACAATCGTGGATCGC<br>CGCGGCAAGCCGGTGGGGAAGTTCACCGCCCCGGCA |
|--|--|-------------------------------------------------------------------------------------------------------------------------------------------------------------------------------------------------------------------------------------------------------------------------------------------------------------------------------------------------------------------------------------------------------------------------------------------------------------------------------------------------------------------------------------------------------------------------------------------------------------------------------------------------------------------------------------------------------------------------------------------------------------------------------------------------------------------------------------------------------------------------------------------------------------------------------------------------------------------------------------------------------------------------------------------------------------------------------------------------------------------------------------------------------------------------------------------------------------------------------------------------------------------------------------------------------------------------------------------------------------------------------------------------------------------------------------------------------------------------------------------------------------------------------------------------------------------------------------------------------------------------------------------------------------------------------------------------------------------------------------------------------------------------------------------------------------------------|

|  |  |                                                                                                                                                                                                                                                                                                                                                                                                                                                                                                                                                                                                                                                                                                                                                                                                                                                                                                                                                                                                                                                                                                                                                                                                                                                                                                                                                                                                                                                                                                                                                                                                                                                                                                                                                                                                                                          |
|--|--|------------------------------------------------------------------------------------------------------------------------------------------------------------------------------------------------------------------------------------------------------------------------------------------------------------------------------------------------------------------------------------------------------------------------------------------------------------------------------------------------------------------------------------------------------------------------------------------------------------------------------------------------------------------------------------------------------------------------------------------------------------------------------------------------------------------------------------------------------------------------------------------------------------------------------------------------------------------------------------------------------------------------------------------------------------------------------------------------------------------------------------------------------------------------------------------------------------------------------------------------------------------------------------------------------------------------------------------------------------------------------------------------------------------------------------------------------------------------------------------------------------------------------------------------------------------------------------------------------------------------------------------------------------------------------------------------------------------------------------------------------------------------------------------------------------------------------------------|
|  |  | ATTCACGGCACCAGCCGGACGCGCCGAGCGCAGATC<br>AGAGCGTACGAGAACGGCCTCGGGTTACTTTTCGCT<br>CGCTCGGTTCGTCATTGGAAAGGCGGCGAATCAGGCA<br>ATAAACCTGAAATACTTCGCAAAGAATCGACGAGAG<br>CGAAGCCCGGATCAGTACGAGACGCTCAGAAAATCC<br>GCAGAGGCGATCGACCGCGTTGCTCGTAGAGCGAAG<br>AAGATCTCGGC GAACTGCATTGATGAAGTTCGACAA<br>CCGCTCATGGTCCTTGAGGCCGAGGCTTCGCGCATCT<br>ACTGGAGTTCGTTGTCAGCTCTTTACGGCAGCAGCTC<br>TGGCTTTGTGCACCGCGAGCAAAGGGGTACCAAGAA<br>TCCAGTCAATGCTGCGCTGAACTACGCCTACGGTGTA<br>CTGACAGGCGAAGTTTGGACAGCGTGCCTCCTGGCT<br>GGGCTTGAACCGTACGCAGGATTCCTACACGCGGAC<br>CGACCAGGGAGGCTCAGTTTCGTGTTGGACCTTATCG<br>AGGAGTTTCGGCCAGTGGTCGCGGATAGGGTCGTAT<br>TCGCACTCGCGGCGAAGGGGTGGAGGATTGAACAAG<br>AGGAGAATGGATGGCTCTCGCTCGCGTCGAAAAACA<br>AGCTCCTCGCGAGTTTGGCCGAGAGGTTGGATTCTCC<br>CGAGCCTGACCGCGGGAGGAGGCGCAAACCTGCGCA<br>ACGTAATTCAGCGGCAGGCATACGCAGCGGCACAGC<br>ATTTCTTAGGAAATGAAACCTACGTGCCATATAAGC<br>AGAGGTGGTAGCAGAATGACCTGGCTCGTTGTGTAT<br>GACATTGAGGATGACAGAGTTCGAACGAAGGTCGCA<br>GACTATTGCCTGGACAAGGGTCTGGAGCGGATCCAA<br>TACAGTTGCTTTCTTGCGGAGATGTCGCGAACATTGG<br>CTCGCGAGCTGGCATCAAAGTGCAAGCGGAAGCTCG<br>GGGACAAGCCCGGAAGATTCGGCTTGTTCCCGTTT<br>GTGAAAAGGACCTTGCAAGCCAGGTTCGAATCGAGA<br>ATGTGCCTTGATCATGGAAGTCTCGCCGAGTGATGG<br>ATTCGTCTCCGTATCCGAGGTCAGACAGTGGTCATAT<br>TGTCCGCGTGTGCTCTGGCACAACCGCTGGCTAGGG<br>GAACGCAGACCCAGACGTCTCGAATGGAAGAAGG<br>GAGGGCCGACCAGGCGGAACGGGAGCGGAAGGAGA<br>AGAGGCGCACGTTTCGCCGAATACCGGTTGCCTGCCC<br>AATCGCGAAGATTCAACGTGTACTTGAGGTCGGAGC<br>GGCTCGGTGTTTCTGGTGTGCTGGACGCCGTGCTGGA<br>ACTTACGAATCGCTCCATCGACGAAGTGGACTCCCA<br>AGGGCTCGATCCGGAACGCCCTTATTTTCGCGCCAGTT<br>GAGTATAAGAGCACGCAAGAGAGGGTTCGGCCGCCAT<br>CATCTTCTGCAGCTCGCAGGGTATGCGGGCGCTGCTCT<br>CCGATATTACGGGAACGAGCGTACCGTTCGGATACT<br>TCGTTTCGCTTCCAACGGGCGAGCAAGCAGGGTCG<br>AACTGAGCGAGAAGGCGAGGGAAGAGTTCCTTTTCGT<br>GCGTGCAAGGGATACGTAACATGGTAGTCGAGTGCC |
|--|--|------------------------------------------------------------------------------------------------------------------------------------------------------------------------------------------------------------------------------------------------------------------------------------------------------------------------------------------------------------------------------------------------------------------------------------------------------------------------------------------------------------------------------------------------------------------------------------------------------------------------------------------------------------------------------------------------------------------------------------------------------------------------------------------------------------------------------------------------------------------------------------------------------------------------------------------------------------------------------------------------------------------------------------------------------------------------------------------------------------------------------------------------------------------------------------------------------------------------------------------------------------------------------------------------------------------------------------------------------------------------------------------------------------------------------------------------------------------------------------------------------------------------------------------------------------------------------------------------------------------------------------------------------------------------------------------------------------------------------------------------------------------------------------------------------------------------------------------|

|  |  |                                                                                                                                                                                                                                                                                                                                                                                                                                                                                                                                                                                                                                                                                                                                                                                                                                                                                                                                                                                                                                                                                                                                                                                                                                                                                                                                                                                                                                                                                                                                                                                                                                                                                                                                                                                                                                                                  |
|--|--|------------------------------------------------------------------------------------------------------------------------------------------------------------------------------------------------------------------------------------------------------------------------------------------------------------------------------------------------------------------------------------------------------------------------------------------------------------------------------------------------------------------------------------------------------------------------------------------------------------------------------------------------------------------------------------------------------------------------------------------------------------------------------------------------------------------------------------------------------------------------------------------------------------------------------------------------------------------------------------------------------------------------------------------------------------------------------------------------------------------------------------------------------------------------------------------------------------------------------------------------------------------------------------------------------------------------------------------------------------------------------------------------------------------------------------------------------------------------------------------------------------------------------------------------------------------------------------------------------------------------------------------------------------------------------------------------------------------------------------------------------------------------------------------------------------------------------------------------------------------|
|  |  | <p>GAATGCCGGAGCCCACGCCTTCGCGGGCGAAGTGCC<br/>GAGACTGTGAGTTCCGCCGCTTCTGCAATGACGTGTG<br/>GTGAGCCCGCAACCCTGTCAACCGACGGATCCCGG<br/>CCCAATGTGCGAAAGTAGCGCGGGCGCCGTTGCTCG<br/>ATCCTCCATGCCGGGAGTGCGAAGAGGTGCCTCCAT<br/>TTTGGGGCAGTAGGAGGCTTATCGGCCTCCTCCGCCG<br/>TCCGCAGCAGGCCGGAGCCGCCGAAGTGTTCGCACA<br/>TTGGCGCAGATACACTGGCAGATATGGGGTTGCGAA<br/>TCTCGCGGACGAATCGGGTGTGTTGAACCAAAAATGC<br/>GGCGATAATGTACGGAAGCCCGAGTGCGGAGCCCCA<br/>GCCTTTGAGGCTGGCCCTACGGGCGCAGGACAAAA<br/>TGCACACTCTAAAGGAATGAAAGGGTCACGGCCACG<br/>GTGAGCGCGACGGACGTGAGCTCGGGCAGGACAA<br/>AATGCACACTCTAAAGGAATGAAAGGAGGGCTGGA<br/>AACTCGAAATCCTCGACACGGGCGGGCGCAGGACAA<br/>AATGCACACTCTAAAGGAATGAAAGGAAAAGAATC<br/>GAGACGGCGCAAAGCCGAAAGAATACTGGCGCAGG<br/>ACAAAATGCACACTCTAAAGGAATGAAAGGGTCTG<br/>ATAGCCAAGTAGTGCTCGATTCCCACCCTGGCGCA<br/>GGACAAAATGCACACTCTAAAGGAATGAAAGATCAG<br/>CTCGAGGGCGTTCGCAAGCGCGACCGCTTCTCGGC<br/>GCAGGACAAAATGCACACTCTAAAGGAATGAAAGA<br/>CGGAGAGTGGATGCTCTTGGCACGAGAGCGCTGGCA<br/>GGCGCAGGACAAAATGCACACTCTAAAGGAATGAA<br/>AGACACGACGCGCGGGTGAGCCGCGAGGAGTTCCGG<br/>CTGCGGCGCAGGACAAAATGCACACTCTAAAGGAAT<br/>GAAAGAGGCAGATGCGCGGGCGGACCATGATCGCGA<br/>CACTCCTGGCGCAGGACAAAATGCACACTCTAAAGG<br/>AATGAAAGCTCGTGGAAGTTCCGGAAGCGCTCTTCA<br/>GTAGAGAGCGGCGCAGGACAAAATGCACACTCTAAA<br/>GGAATGAAAGACAACGCAGCGTCTCGCAACAGGCCG<br/>TATCTCGCAGTGGCGCAGGACAAAATGCACACTCTA<br/>AAGGAATGAAAGGAGCAGAACGCGGCGCAATACGG<br/>GAGGGGCGGACCGGCGCAGGACAAAATGCACACTCT<br/>AAAGGAATGAAAGGGATATGTTTCCGTGAACGCCGG<br/>TCGCTCGGACGCCGGGCGCAGGACAAAATGCACACT<br/>CTAAAGGAATGAAAGTCTTTTAGCGTCGAAAAACCC<br/>CGACATTTTTTCGCCAAAACCGGCGCAGGACAAAATG<br/>CACACTCTAAAGGAATGAAAGTGCATAACTCTACCT<br/>CGCTAATAGCGCGTGAACGGAAAGGCGCAGGACAA<br/>AATGCACACTCTAAAGGAATGAAAGGAAGTACAGG<br/>GCGTCATTCTGTGTCGAACGGATCCGGCAGGCGCAGG<br/>ACAAAATGCACACTCTAAAGGAATGAAAGACTCG<br/>GCGCGCACTTGAAGATGAAAGAGCCCCAGGCGCA</p> |
|--|--|------------------------------------------------------------------------------------------------------------------------------------------------------------------------------------------------------------------------------------------------------------------------------------------------------------------------------------------------------------------------------------------------------------------------------------------------------------------------------------------------------------------------------------------------------------------------------------------------------------------------------------------------------------------------------------------------------------------------------------------------------------------------------------------------------------------------------------------------------------------------------------------------------------------------------------------------------------------------------------------------------------------------------------------------------------------------------------------------------------------------------------------------------------------------------------------------------------------------------------------------------------------------------------------------------------------------------------------------------------------------------------------------------------------------------------------------------------------------------------------------------------------------------------------------------------------------------------------------------------------------------------------------------------------------------------------------------------------------------------------------------------------------------------------------------------------------------------------------------------------|

|  |  |                                                                                                                                                                                                                                                                                                                                                                                                                                                                                                                                                                                                                                                                                                                                                                                                                                                                                                                                                                                                                                                                                                                                                                                                                                                                                                                                                                                                                                                                                                                                                                                                                                                                                                                                                    |
|--|--|----------------------------------------------------------------------------------------------------------------------------------------------------------------------------------------------------------------------------------------------------------------------------------------------------------------------------------------------------------------------------------------------------------------------------------------------------------------------------------------------------------------------------------------------------------------------------------------------------------------------------------------------------------------------------------------------------------------------------------------------------------------------------------------------------------------------------------------------------------------------------------------------------------------------------------------------------------------------------------------------------------------------------------------------------------------------------------------------------------------------------------------------------------------------------------------------------------------------------------------------------------------------------------------------------------------------------------------------------------------------------------------------------------------------------------------------------------------------------------------------------------------------------------------------------------------------------------------------------------------------------------------------------------------------------------------------------------------------------------------------------|
|  |  | GGACAAAATGCACACTCTAAAGGAATGAAAGCGAAT<br>CGGCCACGTCCACGGCCCCTCAGACGGGTCGAGGCG<br>CAGGACAAAATGCACACTCTAAAGGAATGAAAGAG<br>CCGAGCGTCAGGGGTTTCATTCCGTCTCTCCTTCGC<br>GGCGCAGGACAAAATGCACACTCTAAAGGAATGAA<br>AGTTGCAAGTCTCATTTCGATTGCCTCCATGATTGCTT<br>GAGGCGCAGGACAAAATGCACACTCTAAAGGAATG<br>AAAGCGGCTACGCACGGATGGACTCCGCACGCGTAA<br>TCTCTGGCGCAGGACAAAATGCACACTCTAAAGGAA<br>TGAAAGTAGTCGAATGCGTTTTGATCGCGAATGCGC<br>GTAACGGGCGCAGGACAAAATGCACACTCTAAAGGA<br>ATGAAAGCCAGCCACTTCCATATCCGTTCGATCGCGC<br>GCGAGCAGTGGCGCAGGACAAAATGCACACTCTAAA<br>GGAATGAAAGGTAAAGGAGATCGTGGCAGCCGCGA<br>CCGCGCTCTTGGGCGCAGGACAAAATGCACACTCTA<br>AAGGAATGAAAGTGTGATTGCAGGTCCGAGTGCATC<br>GCTCGCGCATCCTGGCGCAGGACAAAATGCACACTC<br>TAAAGGAATGAAAGCGCGTCTCTTATAGGGATCAGT<br>CGGAATCCTCATTAGGCGCAGGACAAAATGCACACT<br>CTAAAGGAATGAAAGCAACTGGATGGTCAGAATGCG<br>GTCGTA CTCTGTGGGGGCGCAGGACAAAATGCACAC<br>TCTAAAGGAATGAAAGTGACGACGACGTTCCGGCTCG<br>CGATTCTGAATCGCGGGGCGCAGGACAAAATGCACAC<br>TCTAAAGGAATGAAAGTTACCAAAACCGAAACCATT<br>ATTGGGAATGGGGAAAACGGCGCAGGACAAAATGC<br>ACACTCTAAAGGAATGAAAGACCCGTCCGGTGAACTC<br>GACGAACAAGTCTCGATGTCCGGCGCAGGACAAAAT<br>GCACACTCTAAAGGAATGAAAGGAGAAGACCCCCGC<br>GAGGCGAAGAACCTGGGCCATCTGGGCGCAGGACA<br>AAATGCACACTCTAAAGGAATGAAAGGGATCCTCGA<br>GCCTGAGCAGTAATGGACTGGTCCGAGGGGCGCAGG<br>ACAAAATGCACACTCTAAAGGAATGAAAGGGTCCGC<br>TGGGCGCTGTGCACTACGGTTCGCTGCCGGCGGCGC<br>AGGACAAAATGCACACTCTAAAGGAATGAAAGACTC<br>CAGGGCCTCCCTGTTGGTGAAGAACAGATAGGGCGC<br>AGGACAAAATGCACACTCTAAAGGAATGAAAGTCTT<br>ATCTGCCTCCGGCATTATTTCTTCTTGGGGCGGGCG<br>CAGGACAAAATGCACACTCTAAAGGAATGAAAGTCC<br>CTGAGCCCTTGCAAGTCCAGTGAGACGTTGTCGAGG<br>CGCAGGACAAAATGCACACTCTAAAGGAATGAAAGT<br>TGTAGACGACGTTCCGAGTAGACGCGCGAGCCCGCA<br>GGCGCAGGACAAAATGCACACTCTAAAGGAATGAA<br>AG |
|--|--|----------------------------------------------------------------------------------------------------------------------------------------------------------------------------------------------------------------------------------------------------------------------------------------------------------------------------------------------------------------------------------------------------------------------------------------------------------------------------------------------------------------------------------------------------------------------------------------------------------------------------------------------------------------------------------------------------------------------------------------------------------------------------------------------------------------------------------------------------------------------------------------------------------------------------------------------------------------------------------------------------------------------------------------------------------------------------------------------------------------------------------------------------------------------------------------------------------------------------------------------------------------------------------------------------------------------------------------------------------------------------------------------------------------------------------------------------------------------------------------------------------------------------------------------------------------------------------------------------------------------------------------------------------------------------------------------------------------------------------------------------|

|                                              |                                                                                                                                   |                                                                                                                                                                                                                                                                                                                                                                                                                                                                                                                                                                                                                                                                                                                                                                                                                                                                                                                                                                                                                                                                                                                                                                                                                                                                                                                                                                                                                                                                                                                                                                                                                                                                                                                                                                                                                                                                                                                    |
|----------------------------------------------|-----------------------------------------------------------------------------------------------------------------------------------|--------------------------------------------------------------------------------------------------------------------------------------------------------------------------------------------------------------------------------------------------------------------------------------------------------------------------------------------------------------------------------------------------------------------------------------------------------------------------------------------------------------------------------------------------------------------------------------------------------------------------------------------------------------------------------------------------------------------------------------------------------------------------------------------------------------------------------------------------------------------------------------------------------------------------------------------------------------------------------------------------------------------------------------------------------------------------------------------------------------------------------------------------------------------------------------------------------------------------------------------------------------------------------------------------------------------------------------------------------------------------------------------------------------------------------------------------------------------------------------------------------------------------------------------------------------------------------------------------------------------------------------------------------------------------------------------------------------------------------------------------------------------------------------------------------------------------------------------------------------------------------------------------------------------|
| <p>CRISPR-Cas<math>\pi</math>-2 cassette</p> | <p>DNA nucleotides sequence of CRISPR-Cas<math>\pi</math>-2 cassette from <i>Cas<math>\pi</math></i> gene to the last repeat.</p> | <p>ATGGGTAAGAATCGATCCTCGTCCTCGGATTTGAGCC<br/> CGCTCGAACGGTCCTTGCGGAAGGTCCGGTGAGAATC<br/> GCCTTGAGCGGCTGCGGGTGCAGAGGAGAAGATTA<br/> GGAAGCACATAGAACAGCACCCCCGCGGTAAGAAC<br/> GATCATCAGGCTCTCCACTTCTTATTGCACCAAATCG<br/> AGGTCGAGCGTAACGACCTGTACCGAAACCTCAAAG<br/> ACCCCGAGTACGTGCCCAAACCAGCGAAACAGCGGC<br/> GCGAAAGACGGCAGATCAACGTCGCCAAACCCCCGA<br/> CTCGACCAAAGAAGGAAAAGGGGCTCAACCAGAG<br/> TCGACGAAGTACGTGATCCGTCCACCAGTCCCTGGG<br/> AAAAACCTTCTGCCTTTGCTAGCAAGTACGAGGCG<br/> CGAGACACGCGGGACGATTCTACCAGGACGGTCGC<br/> TCATGGACCTCCGCACCATATGTTGAAGTCGAACTTC<br/> CCATCCTTGGTGCAGACAAAGTCATCCAGAACTGA<br/> TGAAGTTCGTGCAGAAGGACGAGCGGTCGATCGTGC<br/> GCGACTGGGCGACAAAGACGTATAGCTCGATCGAAG<br/> CCGCAAGAGAAGCACTCCTTGTGCGGGCACAAGTCT<br/> CGGAAGACGTTTCGGTCTGGCGCGGACTCCTCGCAG<br/> AAACGAAGAACGCACAGAACTTCGCCGCCCTCTCCG<br/> ACGATCAGATCGAAGCAGCGATGTCGAAGGAGGCG<br/> AAGGGCGCGGACTTGCCTCCGAGGCGCGCCGCACTG<br/> CTGGTCGCACAGCGCCACTGGGTGGATCAGACCGTC<br/> AAAGCAATCAAGGAGTCCGCACCGTCCGGCGTGCAG<br/> AAGGACACTCTCGATCGCCGTCTGCGCGCAGGTCTG<br/> AGGGGGTTTCATACTGCGGCCAACTCAGGCAAGCAC<br/> ACGAACCCGCAGTTCCCATACCTCACCGCAGAGAAG<br/> CCGGTAGTCCCGATGGAGTCTGTTGTTTCAGAGCGTAT<br/> TGGCCTTTCTCGACGATCCAGACGATCAAAGGTACA<br/> CGAAGGACAAAGAAGACGACAAGAAGCGCCACCGC<br/> GTCACTGTCTTGCAGAAGGAGCTCGGAAAGGCGAGG<br/> CCACGAAAACGGTTAGAACTCCAAACGCCGAAATGG<br/> GCCGGCAGGCCACGGTAAAAGGAACCATCAGCAA<br/> ACGGCGCGACGCAGCGCTCGTCTGGGACACAAGCAA<br/> AGAAGCGAACGGGCTTTGTCTCGCGCTCCCAATCGG<br/> GGGCATGCCGAAGATAGACGTCGAGCAGTTCATCTA<br/> CCAGGATGGGACGTCGCTCCTGTCCGATTGCCAGAT<br/> CGCATCGAAAACGACCAAGAAGGGCGCGGCTTGCGC<br/> AGTCTTGCCGCTCAAGCCCAAGCATGACTTCTGCGC<br/> TGGTTCACCAAGCACGTCGAGAACCACAATCCCGAC<br/> GCTCCACTGGAACGCAGGTGCCTCCACAACACGACC<br/> CAGTTCGTATAGTCGACCCAGAAGGGCCGCGCCCA<br/> CGTCTTTCGTCCGGCCCGTCTTCAAGTTCTACGACC<br/> CCGGCAAGACGGTGCCGAACACGCATGAAACTTGGA<br/> AAAAGCCGACTGCCGCTACCTGGTTGGAATCGACC</p> |
|----------------------------------------------|-----------------------------------------------------------------------------------------------------------------------------------|--------------------------------------------------------------------------------------------------------------------------------------------------------------------------------------------------------------------------------------------------------------------------------------------------------------------------------------------------------------------------------------------------------------------------------------------------------------------------------------------------------------------------------------------------------------------------------------------------------------------------------------------------------------------------------------------------------------------------------------------------------------------------------------------------------------------------------------------------------------------------------------------------------------------------------------------------------------------------------------------------------------------------------------------------------------------------------------------------------------------------------------------------------------------------------------------------------------------------------------------------------------------------------------------------------------------------------------------------------------------------------------------------------------------------------------------------------------------------------------------------------------------------------------------------------------------------------------------------------------------------------------------------------------------------------------------------------------------------------------------------------------------------------------------------------------------------------------------------------------------------------------------------------------------|

|  |  |                                                                                                                                                                                                                                                                                                                                                                                                                                                                                                                                                                                                                                                                                                                                                                                                                                                                                                                                                                                                                                                                                                                                                                                                                                                                                                                                                                                                                                                                                                                                                                                                                                                                                                                                                                                                                                                                              |
|--|--|------------------------------------------------------------------------------------------------------------------------------------------------------------------------------------------------------------------------------------------------------------------------------------------------------------------------------------------------------------------------------------------------------------------------------------------------------------------------------------------------------------------------------------------------------------------------------------------------------------------------------------------------------------------------------------------------------------------------------------------------------------------------------------------------------------------------------------------------------------------------------------------------------------------------------------------------------------------------------------------------------------------------------------------------------------------------------------------------------------------------------------------------------------------------------------------------------------------------------------------------------------------------------------------------------------------------------------------------------------------------------------------------------------------------------------------------------------------------------------------------------------------------------------------------------------------------------------------------------------------------------------------------------------------------------------------------------------------------------------------------------------------------------------------------------------------------------------------------------------------------------|
|  |  | <p>GAGGCATCAATTACGTTCTGCGAGCCGTCGTCGTCG<br/>ATACTGAAGAGAAGAAGGTTATCGCCGATATCGGCT<br/>TGCCGGGCAGGAAGCACGAATGGAGGATGATCCGTC<br/>ACGAGATCGCCTACCACCAACAGATGCGTGATCTTG<br/>CCCGCAACACTGGCAAACACGCGAGCGTCGTGGCCA<br/>AGCACGTCCGCGCCCTCGCGCTCGCGCGCAAGAAGG<br/>ACCGCGCGCTCGGCAAGTTCGCAACAGTCGAAGCCG<br/>TCGCAGAACTTGTCAAGAAGTGTGAACAGGACTATG<br/>GTAGCGGCAACTACTGTTTCGTGCTCGAAGACCTCG<br/>ACATGGGGGCGATGAATCTCAAGCGAAACAACAGA<br/>GTCAAACACATGGCGGTCATGGAGGAGGCCCTCGTC<br/>AATCAAATGCGCAAGCAGGGCTATGCCTATGACGGG<br/>CGTCGCGGTCGGGTGGACGGCGTGAGGCACGAGGGC<br/>GCTTGGTACACGAGCCAGGTCTCGCCCTTTGGCTGGT<br/>GGCCAAGCGCGACGAAGTCGAGGAGGCGTGGAAG<br/>AGGGACAAGACTCGCCCCATCGGGCGCAAGGTCGGC<br/>AACTGGTACGAGATGCCCGAGCCAGGCCAAGACGGA<br/>GACCGGCCCGACACGTATCGGAAGGGCTACTGGTCG<br/>AAACCGAAGAACGCGGAGGGCAAGCCGTATGGGCG<br/>CAACCGCTTCAGCGTCGAGCCTGGCGACGAGAAGCC<br/>GGACGCTGAGCGGCGCTTCTGCTGGGGCAGCGAGCT<br/>GTTCTGGGATCCGAACGTGAAGTCCTTCAAGGGCAA<br/>GGAGTTTCCCGAGGGCGTCGTGCTGGACGCCGACTT<br/>CGTAGGAGCCCTCAACATCGCTCTCCGCCCGTTGGTC<br/>AACGACGGCCAGGGTAAAGGCTTCAAGGCCGAGGA<br/>CATGGCGAGGGAGCACACGATACTAAACCCGCGATT<br/>CAAGATCGCCTGCCAGATAACAGTTTACGAGTTCGTC<br/>GAAGAGGACGGCGACAAGTGGGCAGCTCTGCGCCG<br/>GATCATGCTATAGTTAGGCGTTCCGTCTCGACTATGC<br/>CGTACCACTAGACCGAGCCTACACGGCACGCGGTCA<br/>TAGCGTTAACCAAGGCGTGGTGACAAGCCTCTTTCA<br/>GGCGTCGGACACTTAAGAGCGTTAGGCGGGCGGTCC<br/>CTAAGCCGCCCGCCCCCTTATTTGCACGTTTTCCCCG<br/>AACCCCGTAACTCTGCCAGCCACAAACACCCAGAAG<br/>CGCGTCTACACTCCCTACGGGGGTAGACAGACATGC<br/>GCTATGAGATCGTAGACGGTTACGGGTGCCAAGTGC<br/>TCAAGCACAGCGAGCGCCTCGTTCTTCGATACCCCT<br/>CGCCCCTCCGGGGGAGAGGGGGCCAGGGGGTGAGG<br/>GGAAGCAACCAAGCGCGAGGTGCCCGTCTTGACC<br/>TTGACCACTTGCTCATCGGCACGAAGGGCGTGACGG<br/>TCTCGACCGACGCCCTCGCTCTGTGCTGTGAGCGCGG<br/>GATTCCCGTCACGGTCGTGGACTGGCGCGGGCGGCC<br/>GGTGGGTAGGTTTCGGAAGCCCTGCTCTCCACGGCAC<br/>AGCACAGGTGCGCCGCGCGCAGATCGCTGCTTTCGC</p> |
|--|--|------------------------------------------------------------------------------------------------------------------------------------------------------------------------------------------------------------------------------------------------------------------------------------------------------------------------------------------------------------------------------------------------------------------------------------------------------------------------------------------------------------------------------------------------------------------------------------------------------------------------------------------------------------------------------------------------------------------------------------------------------------------------------------------------------------------------------------------------------------------------------------------------------------------------------------------------------------------------------------------------------------------------------------------------------------------------------------------------------------------------------------------------------------------------------------------------------------------------------------------------------------------------------------------------------------------------------------------------------------------------------------------------------------------------------------------------------------------------------------------------------------------------------------------------------------------------------------------------------------------------------------------------------------------------------------------------------------------------------------------------------------------------------------------------------------------------------------------------------------------------------|

|  |  |                                                                                                                                                                                                                                                                                                                                                                                                                                                                                                                                                                                                                                                                                                                                                                                                                                                                                                                                                                                                                                                                                                                                                                                                                                                                                                                                                                                                                                                                                                                                                                                                                                                                                                                                                                                                                        |
|--|--|------------------------------------------------------------------------------------------------------------------------------------------------------------------------------------------------------------------------------------------------------------------------------------------------------------------------------------------------------------------------------------------------------------------------------------------------------------------------------------------------------------------------------------------------------------------------------------------------------------------------------------------------------------------------------------------------------------------------------------------------------------------------------------------------------------------------------------------------------------------------------------------------------------------------------------------------------------------------------------------------------------------------------------------------------------------------------------------------------------------------------------------------------------------------------------------------------------------------------------------------------------------------------------------------------------------------------------------------------------------------------------------------------------------------------------------------------------------------------------------------------------------------------------------------------------------------------------------------------------------------------------------------------------------------------------------------------------------------------------------------------------------------------------------------------------------------|
|  |  | CACCGAGATAGGAGCAACCTTCGCCCGAGAGGTCGT<br>CAGCGGCAAGTTGCTCAACCAGGCCGACAACCTCCG<br>ATACATCGGCAAGAACAGAAAGACACGGGCGCCCA<br>ACGAGCACGAGGCCCTGACAAGGACAGCTGACACGC<br>TCCAACGTCTGGCAAAGAAGGCAGCGACGGTCAAGG<br>GCAAGAACGCGGACGACGTGCGGCTCCCGCTCATGA<br>CGGTTCGAGGCCGAGGGCGCGCGCCTACTGGTCCG<br>TTCTCAGCGAGGTTTACGGCGAGAGGTCGGGCTTCG<br>CAAAGCGAGAGCAACGTGGCACACGCGACCCGGTCA<br>ACGCCGCGCTCAACTACGCCTACGGAGTCTGAACG<br>GCGAGGTCTGGAATGCCACGATCCTCGCTGGCCTCG<br>AGCCGTACGCAGGGTTCCTGCATGTGGATCGGCCGG<br>GACGCCTGAGCTTCGTGCTCGATCTGATGGAAGAGT<br>TCCGCCCCGTGGTCGCGGACCGCGTCGTGTTCCGACT<br>GGTGGCGAAGGGCTGGAAGATCGGCCAGGAGGAGA<br>ACGGCTGGCTGGACATGCCGACAAAAGGAGACTGA<br>TTCAGGCGATCGGCGAGAGGTGGGGAGCGCGCTCC<br>TGCATCAAGCCCGGAAACTGCAATTGCGATCTGTCT<br>CCAGCTTCAGGCACGCGACGCCGCAAGGCACTTCCA<br>GGCAAGGCGGAGTACATCGCGTTCGCGCTGAGGTG<br>GTAGGCCATGAAGTGGCTCGTGTGCTACGACATCGA<br>GAAGGATAGTGTCCGAAACAAGGTGGCAGACTTCTG<br>CCTGGACAAGGGGCTCGAGCGGGTTCAATACAGCGT<br>CTTCCTTGGGTCGATGACAAGAACGCTCGCCAAAGA<br>ACTTGCGCACAGATCAGACGGAAGATGGGCAAGA<br>ACCCCGGCCAGGTGCGGTTTCGTGCCGATCTGCGACA<br>AAGACTGGAAGACGTCGTTCCGCGTCCAGGTCGGCG<br>ACCACATGGGAGAGAAGGCGAGCGATGGCAAGTAG<br>CGCCACGCCTATCAGCCGAGAGACACGGTAAGCGT<br>AAGCGAACTCCGCCAGTGGATGTACTGCCCGCGCGT<br>TGTTTGGTACGGACGCTCGATGGGCGACTACCGTCCC<br>ACGACAGGCGCTATGAAAGTCGGGATCGAGGCGGA<br>GGCGGAGCGCCAAAGGCTGGAGGAGCGCCGGTTCGTT<br>CGCGCAGTACGGGCTGGAGGCATGCAACAAGCGATT<br>CCAAGTGCTGTAGCGTCGGAGGCGTTGGGGCTGTC<br>GGGGCGCATTGACTGCCTGATCGAACTTACGCCCCGTT<br>TCGCTGGAGGACGCTCAGGTCGGGGTGAGGCCGTTG<br>AACTGGAAGGTGGGCGATCCGATGTTTCGTGCCAGTC<br>GAGTACAAATGGACGTCCAGGGCTGACCAGAGGCAG<br>AACACAATTCAGCTGGCCGCTTATGGGATGATTCTG<br>GAAAGCTTGACGGGGACGCCCGTGCCGCTCGGCTTC<br>ATCGCGCTCCTGCCTGAGGAAGAGGTTGTCCGTGTC<br>GAACTCGTCCCTAGAGTTAGGCGCGCAGTCAAATGC<br>ACCCTAGACGAGGCTCGCGAAGGCCTCTCCGCCCGG |
|--|--|------------------------------------------------------------------------------------------------------------------------------------------------------------------------------------------------------------------------------------------------------------------------------------------------------------------------------------------------------------------------------------------------------------------------------------------------------------------------------------------------------------------------------------------------------------------------------------------------------------------------------------------------------------------------------------------------------------------------------------------------------------------------------------------------------------------------------------------------------------------------------------------------------------------------------------------------------------------------------------------------------------------------------------------------------------------------------------------------------------------------------------------------------------------------------------------------------------------------------------------------------------------------------------------------------------------------------------------------------------------------------------------------------------------------------------------------------------------------------------------------------------------------------------------------------------------------------------------------------------------------------------------------------------------------------------------------------------------------------------------------------------------------------------------------------------------------|



|  |                                                                                                                                                                                                                                                                                                                                                                                                                                                                                                                                                                                                                                                                                                                                                                                                                                                                                                                                                                                                                                                                                                                                                                                                                                                                                                                                                                                                                                                                                                                                                                                                                                                                                                                                                                                                                                                                                              |
|--|----------------------------------------------------------------------------------------------------------------------------------------------------------------------------------------------------------------------------------------------------------------------------------------------------------------------------------------------------------------------------------------------------------------------------------------------------------------------------------------------------------------------------------------------------------------------------------------------------------------------------------------------------------------------------------------------------------------------------------------------------------------------------------------------------------------------------------------------------------------------------------------------------------------------------------------------------------------------------------------------------------------------------------------------------------------------------------------------------------------------------------------------------------------------------------------------------------------------------------------------------------------------------------------------------------------------------------------------------------------------------------------------------------------------------------------------------------------------------------------------------------------------------------------------------------------------------------------------------------------------------------------------------------------------------------------------------------------------------------------------------------------------------------------------------------------------------------------------------------------------------------------------|
|  | <p>GAACTCCCCTGGCCAACGCTCCACCGCGGAAAGTGC<br/>CAAGACTGCGAGTTCCGACGGTTTTGCAATGACGTCT<br/>GGTAGATGGGGTTGAAACCCCTCGAACCGCTCGGA<br/>TTTCGGGGCGATGTGCGAATCCTAACGCCCCGACA<br/>CTCAAGATGATGGAGGCCTTCGACCCACAATCAAGC<br/>CCGACTCAGACAGCGAAGAGCCAATGGTGTGCGCAA<br/>ATTCGCTCTCACCGGTACATTCATTGCGACAACGGC<br/>GGACTTTGTAAGCTAAATAGCGGGTTTCGAAACGAC<br/>GCGGCCGAACCTGTTAGGGCAGGGTTGCAGCAAATG<br/>GACGGCGTGCTTGAGTCCGGCCATGCATGGTCGCAG<br/>GGGATCAAGAACGCTCTTAGGGAATGAAAGACGGGC<br/>AGTATCGGAGGGCGCGGGAGAGGTGCCAGCCTTCGT<br/>CGCAGGGGATCAAGAACGCTCTTAGGGAATGAAAGC<br/>GTTGCAGGCAATGATCTCTGCAACTGGCCGTCGAAT<br/>GTCGCAGGGGATCAAGAACGCTCTTAGGGAATGAAA<br/>GGGAGTGGGTGCGACTTAAAGCGTTTGACGGTGGCT<br/>GTCGCAGGGGATCAAGAACGCTCTTAGGGAATGAAA<br/>GAAACAAAGACGAATTGCCTGGACGCAGGCAAAAT<br/>ACGTCGCAGGGGATCAAGAACGCTCTTAGGGAATGA<br/>AAGATTGCGACAGCCTCGCCTCATTCCAGGCCGACA<br/>GGCTGGTTCGACAGGGGATCAAGAACGCTCTTAGGGAA<br/>TGAAAGATCGTTCCTGCACGAGAGCGGAGTGAGTCG<br/>CCGGGGGGTTCGACAGGGGATCAAGAACGCTCTTAGGG<br/>AATGAAAGGATTACCTAACCACCCCAGCAGGGCTT<br/>CCGGCCCTGGTTCGACAGGGGATCAAGAACGCTCTTAG<br/>GGAATGAAAGGGAGAGACGGGCAGGGAGAATGAAAC<br/>AATGAAAGCGATCCGTCGACAGGGGATCAAGAACGCT<br/>CTTAGGGAATGAAAGCTCGCCAACCCTCGGACAGG<br/>TTGGGTGGCGGGTTCGACAGGGGATCAAGAACGCTCT<br/>TAGGGAATGAAAGTTGAACCCGCCAAAGCAGTTCAG<br/>CCACGCCGCCAGGTTCGACAGGGGATCAAGAACGCTCT<br/>TAGGGAATGAAAGTATTCCACGCAGCACATCGGAGA<br/>ACTTGCCTTTCGGTTCGACAGGGGATCAAGAACGCT<br/>CTTAGGGAATGAAAGTGCCTAGTGCAGCGGATCTA<br/>TCCGAGGTTGACCGGAGTTCGACAGGGGATCAAGAACG<br/>CTCTTAGGGAATGAAAGGTATGCTCCAAGACCTTCG<br/>TCGTCGGGTTCCAGGCCATGTCGACAGGGGATCAAGA<br/>ACGCTCTTAGGGAATGAAAGTGTAAATTCTGATACAG<br/>GCGCGACCTCACGAGCACCCGTCGACAGGGGATCAAG<br/>AACGCTCTTAGGGAATGAAAGCATTCTGCGCGGCCCT<br/>ATACATCGAATACCTGCGAACGTCGACAGGGGATCAA<br/>GAACGCTCTTAGGGAATGAAAGATTGCCTTCAGCCG<br/>CTTAGCCATTTCGCTCGGCATAGCAAGTCGACAGGGGA<br/>TCAAGAACGCTCTTAGGGAATGAAAGTTTGCCGGCC</p> |
|--|----------------------------------------------------------------------------------------------------------------------------------------------------------------------------------------------------------------------------------------------------------------------------------------------------------------------------------------------------------------------------------------------------------------------------------------------------------------------------------------------------------------------------------------------------------------------------------------------------------------------------------------------------------------------------------------------------------------------------------------------------------------------------------------------------------------------------------------------------------------------------------------------------------------------------------------------------------------------------------------------------------------------------------------------------------------------------------------------------------------------------------------------------------------------------------------------------------------------------------------------------------------------------------------------------------------------------------------------------------------------------------------------------------------------------------------------------------------------------------------------------------------------------------------------------------------------------------------------------------------------------------------------------------------------------------------------------------------------------------------------------------------------------------------------------------------------------------------------------------------------------------------------|

|                                 |                                                                                                                                         |                                                                                                                                                                                                                                                                                                                                                                                                                                                                                                                                                                                                                                                                                                                                                                                                                                                                                                                                                                                                                                                                                                                                                                                                                                                                                                                                                                                                                                                                                                                                                                                                                                                                                                                                                   |
|---------------------------------|-----------------------------------------------------------------------------------------------------------------------------------------|---------------------------------------------------------------------------------------------------------------------------------------------------------------------------------------------------------------------------------------------------------------------------------------------------------------------------------------------------------------------------------------------------------------------------------------------------------------------------------------------------------------------------------------------------------------------------------------------------------------------------------------------------------------------------------------------------------------------------------------------------------------------------------------------------------------------------------------------------------------------------------------------------------------------------------------------------------------------------------------------------------------------------------------------------------------------------------------------------------------------------------------------------------------------------------------------------------------------------------------------------------------------------------------------------------------------------------------------------------------------------------------------------------------------------------------------------------------------------------------------------------------------------------------------------------------------------------------------------------------------------------------------------------------------------------------------------------------------------------------------------|
|                                 |                                                                                                                                         | GAGACGTGCCACCGCCTAGTCAGGCGATGTGCGCAGG<br>GGATCAAGAACGCTCTTAGGGAATGAAAG                                                                                                                                                                                                                                                                                                                                                                                                                                                                                                                                                                                                                                                                                                                                                                                                                                                                                                                                                                                                                                                                                                                                                                                                                                                                                                                                                                                                                                                                                                                                                                                                                                                                            |
| CRISPR-Cas $\pi$ -3<br>cassette | DNA<br>nucleotides<br>sequence of<br>CRISPR-<br>Cas $\pi$ -3<br>cassette from<br><i>Cas<math>\pi</math></i> gene to<br>the last repeat. | ATGGGTAAGAATCGGTCCTCGTCCTCGGATTTGAGCC<br>AGCTCGAACGATCCTTACGGAAAGTCGGTGAGAATC<br>GCCTTGAGCGGCTGCGGGTGCCTGGGCAGAAGATTA<br>GGAAGCACCTTGAACAGCACCCCGAGGTAAGAACG<br>ATCATCAGGCCCTCCACTTTCTGCTCCACCAGATCGA<br>GGTCGAACGGAATGACCTGTACCGAAACCTCAAAGA<br>CCCCGAATACGTGCCCAAGCCAGCGAAACGGCGGCG<br>AGAAAGACGGCAGATCAACGTGCCCCAACCGCCGAC<br>CCGACCCACCAAGAGTGTGGGGCCGAAACCAGCGCC<br>GACGACATACGTGATCCCGCGCCCCGAGCCAGGCCG<br>TGACCTACCAGCATTTCGCGAGCAGGTACAAGGCAAG<br>TGACTCGAGAGGCGAGGACGACCAAGACGGTCGGTC<br>ATGGACTGCCGCGCCCTTTGTCGAAGTCGAGCTGCC<br>GATACAAATTGCCGGCAAGATCCTCGAGAAACTCCG<br>TAAGTACGTGCAAAGGACGAACGGGAGATCGTTCCG<br>CGAGTGGGCTGTCAAGACCTATGGCTCGATCGAAGC<br>CGCAAGAGAACCACTTCTTATCGGGGCACAAGTCTC<br>GGAAGACGTCTCGGTCTGGCGCGGACTCCTCGCAGA<br>AACGAAAAACGCACAGGACTTCGCCGCCCTCTCCGA<br>CGATCAGATCGAAGCAGCGATGTCGAAGGAGGCGA<br>AGGGGTCAGACCTGCGTCCGAGGCGCGCCGCACTGC<br>TAGTCGCACAGCGCCACTGGGTGGATCAGACCGTCA<br>AGGCAATCAAGGAGTCGGCCCCGAAAGGCGTCGATA<br>AGGACACACTCGATCGCCGTTTGC GCGCTGGCCTAA<br>GGGGGTTTCATACAGCAGCTAATTCGGGTAAGCACA<br>CGAACCCACAGTTCCCATACTTGACGCCGAAAGAGG<br>CAAAGGTGCCGTTAGAATCGGTCGTCATCAGGTCT<br>TAGAGTTCCTCGACGACGCGGACGACCAGCGCTACG<br>TCCAGGTCAAGGTTGACGACAAGAAGCGCCACAGAG<br>TCAGTCATCTCCAGAAGGAACTCGGGAAGGCGAGGC<br>CGCGCAAGCGACTGGAGCTTCAGAGGCCAAAGTGGG<br>CGGGTAGGCCTACAGTGCAAGGAACGATCAGCAAAC<br>GGCGCGACGCCGCACTCGTGTGGGACACGAGCAAGA<br>AGGAAAACGGCCTCTGCCTCGCGCTCCCCTCGGGG<br>GTTTGCAGAAGATAGATGTTGAGCGGTTCTATCTACCA<br>AGACGGCACGTCACTATTGTGCGACTGCCAGATCGC<br>GTCGAAGACCTCCAAGAAAGGTGCGGCGTGC GCGCT<br>CATGCCGCTCAAGCCCAAGCACGACTTCCTGCGTTG<br>GTACACCAAACACGTGCGAGAACCACAACGCAGACGC<br>GCCGCTCGAGCGCCGCTGTCTGCACAACACGACCCA<br>GTTTCGTGATCGTGGATCCAGAGGGGCAGCGCCCGCG<br>TCTCTTCATCCGCCCGTCTTCAAGTTCTACGACCCC |

|  |  |                                                                                                                                                                                                                                                                                                                                                                                                                                                                                                                                                                                                                                                                                                                                                                                                                                                                                                                                                                                                                                                                                                                                                                                                                                                                                                                                                                                                                                                                                                                                                                                                                                                                                                                                                                                                                                                                          |
|--|--|--------------------------------------------------------------------------------------------------------------------------------------------------------------------------------------------------------------------------------------------------------------------------------------------------------------------------------------------------------------------------------------------------------------------------------------------------------------------------------------------------------------------------------------------------------------------------------------------------------------------------------------------------------------------------------------------------------------------------------------------------------------------------------------------------------------------------------------------------------------------------------------------------------------------------------------------------------------------------------------------------------------------------------------------------------------------------------------------------------------------------------------------------------------------------------------------------------------------------------------------------------------------------------------------------------------------------------------------------------------------------------------------------------------------------------------------------------------------------------------------------------------------------------------------------------------------------------------------------------------------------------------------------------------------------------------------------------------------------------------------------------------------------------------------------------------------------------------------------------------------------|
|  |  | <p>GGCAAGGCAGTGCCGAACACGCACGAAACTTGGAA<br/>GAAGCCGGACTGCCGCTACCTGGTAGGGATCGACCG<br/>AGGTATCAACTACGTTCTGCGCGCTGTCGTTGTGGAC<br/>ATCGAAAAGAAGGAAGTCATCGCTGACATCCACCTA<br/>CAAGGCGACAAGCACAAATGGAGGATGATCCGCGA<br/>CGAGATCGCCTACCACCAACAGATGCGTGATCTTGC<br/>CAGCAACACAGGCAAACACCCGAGCGTCGTGGCGAG<br/>GCACGTCCGCGCACTCGCCCTCGCCCGCAAGAAGGA<br/>TCGCGCGCTCGGCAGGTTTACGACGGTCAAGGCTGT<br/>CGCAGATATCGTCATGCAATGCGAAAACGACTACGG<br/>AAGCGGTAATACTGCTTCGTGCTCGAAGACCTCGA<br/>CATGGGCAAGATGAATCTCAAGCGCAACAACCGCGT<br/>GAAGCACATGGCCGTCATGAAGGAAGCGCTTGTCAA<br/>TCAAATGCGCAAGCGCGGCTATGCCTACGACGGTGC<br/>CCGCGGCCGGGCGGACGGCGTCAGGTACGAGGGCGC<br/>ATGGTACACGAGCCAAGTGTCCCCCTTCGGCTGGTG<br/>GGCCAAGCGTGAAGAGGTGGAGGAGGCGTGGAAGA<br/>AGGACACGTCGCGCCCGATCGGTGCGAAGGTCGGCA<br/>ACTGGTACGAGATGCCAGATCCGAACGAAGAAGGA<br/>AAGCGGTCAGACGTGTATCGGAAGGGCTGCTGGAAG<br/>AAACCGCAGAACGCAAGCGGAAAGCCATACGGGCG<br/>GAACCGCTTCTGTGTGGAACCTGGCGACGAGAAGCC<br/>GGACGCTCAGCGGCGTTCTCCTGGGGGAGCGAGCT<br/>GTTCTGGGACCCGAACGTGAAGTCCTTCAAGGGCAA<br/>AGAGTTTCCCGAGGGGGTTCGTGCTGGACGCCGACTT<br/>CGTAGGAGCGCTCAACATCGCCCTTCGCCCACTCGTC<br/>AACGACGGTCAGGGCAGGGGCTTACGGCAGACAA<br/>GATGGCCGAAGCGCATAACGAGACTCAACCCGCAAGT<br/>CGAGATCGTTTGCAAAATCCCCGTTTATGAGTTCATC<br/>GAAGAGCACGGTGACAAGAGGGGCAAACTCAGGCG<br/>GATCGTGCTATAGTAGGCCGTTCTGACTCGATGCGG<br/>GACGGATACTACACTAAGCCTAAACGGCACGAGCGA<br/>TAGCCCTGCGGGGATTCCCCAAAGCCCGTACGACAA<br/>GCCTCTTTCAGGCGTCGGACACTTAAGAGCGTTAGG<br/>CGGGCGGTCCCTAAGCCGCTCGCCCCCTTATCCCCAC<br/>GGTTTCCAAGAACCCCGTAACTCTGCCAGTCAAAA<br/>CACCCAGAAGCGCGTCTACACTTACTTGTGAGTAAG<br/>GAGTAGATAGACATGCGCTATGAGATCGTAGATGGC<br/>TACGGGTGCCAGGTGCTTAAGCACAGCGAGCGCCTG<br/>ATCTCAAGTGGTCCGCCAGAGACGACCAGCAACCC<br/>AAGCGGAGGTGCCGATTCTGCACCTCGACCACCTG<br/>CTCGTCGGCTCCAAGGGCGTGACGGTCTCGACCGAC<br/>GCCCTCGCCCTCTGCTGTGAGCGCGGGATTCCCGTCA<br/>CGGTCGTGGACTGGCGTGGTCGTCCAGTTGGGAGGT</p> |
|--|--|--------------------------------------------------------------------------------------------------------------------------------------------------------------------------------------------------------------------------------------------------------------------------------------------------------------------------------------------------------------------------------------------------------------------------------------------------------------------------------------------------------------------------------------------------------------------------------------------------------------------------------------------------------------------------------------------------------------------------------------------------------------------------------------------------------------------------------------------------------------------------------------------------------------------------------------------------------------------------------------------------------------------------------------------------------------------------------------------------------------------------------------------------------------------------------------------------------------------------------------------------------------------------------------------------------------------------------------------------------------------------------------------------------------------------------------------------------------------------------------------------------------------------------------------------------------------------------------------------------------------------------------------------------------------------------------------------------------------------------------------------------------------------------------------------------------------------------------------------------------------------|

|  |  |                                                                                                                                                                                                                                                                                                                                                                                                                                                                                                                                                                                                                                                                                                                                                                                                                                                                                                                                                                                                                                                                                                                                                                                                                                                                                                                                                                                                                                                                                                                                                                                                                                                                                                                                                                                                                                                                                      |
|--|--|--------------------------------------------------------------------------------------------------------------------------------------------------------------------------------------------------------------------------------------------------------------------------------------------------------------------------------------------------------------------------------------------------------------------------------------------------------------------------------------------------------------------------------------------------------------------------------------------------------------------------------------------------------------------------------------------------------------------------------------------------------------------------------------------------------------------------------------------------------------------------------------------------------------------------------------------------------------------------------------------------------------------------------------------------------------------------------------------------------------------------------------------------------------------------------------------------------------------------------------------------------------------------------------------------------------------------------------------------------------------------------------------------------------------------------------------------------------------------------------------------------------------------------------------------------------------------------------------------------------------------------------------------------------------------------------------------------------------------------------------------------------------------------------------------------------------------------------------------------------------------------------|
|  |  | <p>TCGGAAGCCCCGCCCTCCACGGAACGGCACAGGTGC<br/>GCCGAGCACAGATAGCCGCCTTCGACACAAAACGAG<br/>GAGCCTCTTTCGCCAGCGAGATCGTCGGCGGCAAGC<br/>TCCTCAACCAGGCAGACAATCTCAACTACATCGGCA<br/>AGAACAGAAAGACGCGCGCTCCAGAAGTTTACGAAG<br/>AGTTGACAAGGACAGCCGACACGCTCCAACGTCTGG<br/>CAAAGAAGGCAGTGGCGGTCAAAGGCAAGAATGCG<br/>GACGAAATTCGGATGCTCCTCATGACGGTCGAGGCA<br/>GAGGGCGCCCGCGCTTACTGGTCGGTGCTCAGCGAA<br/>GTCTACGGCAAAGGGTCGGGGTTCGCCAAGCGCGAA<br/>CAGCGCGGCACCCGCGACCCGGTCAACGCCGTGCTC<br/>AACTACGCCTATGGCGTACTCAATGGCGAGGTCTGG<br/>AACGCCGTCTGTGCTGGCCGGACTGGAGCCCTACGCA<br/>GGGTTCCCTGCACGTCGATCGGCCGGGACGCCTGAGC<br/>TTCGTGCTCGATCTGATGGAGGAGTTCGCCCCGTCG<br/>TCGCCGACCGCGTTGTGTTTGGCCTCGTCGCCAAGGG<br/>ATGGAAGATCGGTCAGGAGGAGAACGGTTGGCTCGA<br/>TCTATCGACGAAGAAGCGGCTCGTCCGGGCGATCGG<br/>CGACAGGTGGGGACGCGCGTCGAGCACCAAGGTCTG<br/>CAAGTTGCAACTACGATCTGTGCTCCAGCTGCAGGC<br/>ACGGGACGCCGCACGGCACTTCCAGGACAAGGCGGA<br/>GTACGACGCGTTCCGCCAGAGGTGGTAAGGCATGAA<br/>GTGGCTCGTGTGCTACGACATCGAGAAGGATAGTGT<br/>CCGAAACAAGGTGGCAGACTTCTGCCTTGACAAGGG<br/>GCTCGAACGGGTTCAATACAGCGTCTTCCTTGGGTCTG<br/>ATGACAAGAACGCTCGCCAAAGAACTTGGAGCACAG<br/>ATCAGGAAGCGAATGGGCAAGAATCCAGGGCAAGT<br/>GCGCTTTGTGCCGATTTGTGAGAAGGACTGGCGTTCG<br/>TCGTTCCGCGTCCAAGTCGGTGACCACATGGGAGAA<br/>AAGTCATCCGATGATAAGTAGGTTCCACGCCTACCA<br/>ACCACTTGACATGGTGAACGTGAGCGATCTCCGCCA<br/>GTGGGTGTA CTGTCCGCGCGTCGTCTGGTACGGGCG<br/>CTCATGGGGCGACTACCGCCCAGGACCGGGGCGAT<br/>GAAGGTGGGGATAGAGGCGGAGGCGGAGCGGCAGA<br/>GGCTGGAGGAGCGAAGGACGTTTCGCTCAATACGGTC<br/>TGGGGGCGTGACCAAGCGGTTCCAGGTTCCCGTTG<br/>TGTCGGAGGCGTTGGGGCTGTCCGGGCGAATCGACT<br/>GCCTGTTTCGAACTTACGCCCGTTGCGCTGGAGGACG<br/>CTCAGGTCGGGGTGAGGCCGCTGAACTGGAAGGAGG<br/>GCGATCCGATGTTTCGCGCCAGTTGAGTACAAATGGA<br/>CGTCCAGAGCTGACCAGAGGCGGAACACAATTCAGC<br/>TGGCCGCTTATGGGATGATTCTGGAAAGCTTGACGG<br/>GGACGCCCGTGCCGCTCGGCTTCATCGCGCTCCTGCC<br/>TGAGGAAGAGGTTGTCCGTGTGCAACTCGGCCCCAG</p> |
|--|--|--------------------------------------------------------------------------------------------------------------------------------------------------------------------------------------------------------------------------------------------------------------------------------------------------------------------------------------------------------------------------------------------------------------------------------------------------------------------------------------------------------------------------------------------------------------------------------------------------------------------------------------------------------------------------------------------------------------------------------------------------------------------------------------------------------------------------------------------------------------------------------------------------------------------------------------------------------------------------------------------------------------------------------------------------------------------------------------------------------------------------------------------------------------------------------------------------------------------------------------------------------------------------------------------------------------------------------------------------------------------------------------------------------------------------------------------------------------------------------------------------------------------------------------------------------------------------------------------------------------------------------------------------------------------------------------------------------------------------------------------------------------------------------------------------------------------------------------------------------------------------------------|

|                              |                             |                                                                                                                                                                                                                                                                                                                                                                                                                                                                                                                                                                                                                                                                                                                                                                                                                                                                                                                                                                                                                                                                                                                                                                                                                                                                                                                                                                                                                                                                                                                                                                                                                                                                                                               |
|------------------------------|-----------------------------|---------------------------------------------------------------------------------------------------------------------------------------------------------------------------------------------------------------------------------------------------------------------------------------------------------------------------------------------------------------------------------------------------------------------------------------------------------------------------------------------------------------------------------------------------------------------------------------------------------------------------------------------------------------------------------------------------------------------------------------------------------------------------------------------------------------------------------------------------------------------------------------------------------------------------------------------------------------------------------------------------------------------------------------------------------------------------------------------------------------------------------------------------------------------------------------------------------------------------------------------------------------------------------------------------------------------------------------------------------------------------------------------------------------------------------------------------------------------------------------------------------------------------------------------------------------------------------------------------------------------------------------------------------------------------------------------------------------|
|                              |                             | AGTTAGGCGCGCAGTCAAACGCACCCTAGACGAGGC<br>TCGCGAAGGCCTTTCCGCCTCGGAACTCCCCTGGCCA<br>ACGCTCCACCGCGGAAAGTGCCAAGACTGCGAGTTC<br>CGACGGTTTTGCAATGACGTCTGGTAGATGGGGTTCCG<br>AAACCCTCGCAGCTGCTCGGATTTCTGGGGCGATGTG<br>CGAATCCTAACGCCCCGACACTCAAGATGATGGAG<br>GCCTTCGACCCACAATCAAGCCCGACTCAGACAGCG<br>AAGAGCCAATGGTGTGCGCAAATTCGCTCTCACCGG<br>GTACATTCATTCGCACAACGGCGGACTTTGTAAGCTA<br>AATAGCGGGTTTTCGAAACGACGCGGCCGAACCTGTT<br>AGGGCAGGGTTGCAGCAAATGGACGGCGTGTCTGAG<br>TCCGGTCATGCATGGTTCGCAGGGGATCAAGAACGCT<br>CTTAGGGAATGAAAGCCAGCCGCACGCGCAGGGTGC<br>CCCGCTCATCGCGGAGCGTCGCAGGGGATCAAGAAC<br>GCTCTTAGGGAATGAAAGGACCGACGGCCTTCCGAA<br>CGGAGAGGTTCTCGCGTCGTCGCAGGGGATCAAGAA<br>CGCTCTTAGGGAATGAAAGATGGCTCTCGACGAAGG<br>CCTACGGCTGGACCGTCGAGAGTCGCAGGGGATCAA<br>GAACGCTCTTAGGGAATGAAAGGAACCCGTCGCGT<br>CGAGCAGCGCCTTCTGGCCGTTGTCGCAGGGGATCA<br>AGAACGCTCTTAGGGAATGAAAGAACATCCACCTCA<br>CTGGGCGCGTGGTTCGTCATTGCCGTCGCAGGGGATC<br>AAGAACGCTCTTAGGGAATGAAAGACGTAGGCGGTC<br>GCCATCTCCGCTGTCGTCGATTTCCGTCGCAGGGGAT<br>CAAGAACGCTCTTAGGGAATGAAAGCAGCATGAGCA<br>CGCAGGCGATCTCCGGGAGGTCGAACGTCGCAGGGG<br>ATCAAGAACGCTCTTAGGGAATGAAAGACGGTGTG<br>AGGCCCTTGGCGTCCTTGAAGTCGCGTCGCAGGGGA<br>TCAAGAACGCTCTTAGGGAATGAAAGCACACGTTTC<br>GAGGCGGGCAACCTGCAATCGGTTCGGCGGTTCGCAGG<br>GGATCAAGAACGCTCTTAGGGAATGAAAGGCAATCG<br>GTCGGCGATTACGCGTTCTACCTCTGCGACGTCGCAG<br>GGGATCAAGAACGCTCTTAGGGAATGAAAGGGACA<br>GACGGGCAAGGAGAATGAACAATGTCTGCCCTGTGCG<br>CAGGGGATCAAGAACGCTCTTAGGGAATGAAAGTCT<br>CCGGCAATCCGTCGAGGCATTTCCGCGCCTGAGAGTC<br>GCAGGGGATCAAGAACGCTCTTAGGGAATGAAAGCG<br>GAGCGGGCGGATGAAGCGGGGGGGCCAGAACCCTG<br>TCGCAGGGGATCAAGAACGCTCTTAGGGAATGAAAG<br>CCGCCATGTACGCGGCTGAGGAGCCTCCCCGCCTCG<br>TCGCAGGGGATCAAGAACGCTCTTAGGGAATGAAAG |
| CRISPR-Cas $\pi$ -4 cassette | DNA nucleotides sequence of | ATGCCCAAAAAGACATCGACGGTCGCTCTGTCACCC<br>AGAGATATTCGCTTGCGCGAACTTGGAGAGAAGCGA<br>CTTCAAAGGTTGCGACAGCGCGAAGAGAAGATTCGT                                                                                                                                                                                                                                                                                                                                                                                                                                                                                                                                                                                                                                                                                                                                                                                                                                                                                                                                                                                                                                                                                                                                                                                                                                                                                                                                                                                                                                                                                                                                                                                          |

|                                                                                                                               |                                                                                                                                                                                                                                                                                                                                                                                                                                                                                                                                                                                                                                                                                                                                                                                                                                                                                                                                                                                                                                                                                                                                                                                                                                                                                                                                                                                                                                                                                                                                                                                                                                                                                                                                                                                                                                                                                      |
|-------------------------------------------------------------------------------------------------------------------------------|--------------------------------------------------------------------------------------------------------------------------------------------------------------------------------------------------------------------------------------------------------------------------------------------------------------------------------------------------------------------------------------------------------------------------------------------------------------------------------------------------------------------------------------------------------------------------------------------------------------------------------------------------------------------------------------------------------------------------------------------------------------------------------------------------------------------------------------------------------------------------------------------------------------------------------------------------------------------------------------------------------------------------------------------------------------------------------------------------------------------------------------------------------------------------------------------------------------------------------------------------------------------------------------------------------------------------------------------------------------------------------------------------------------------------------------------------------------------------------------------------------------------------------------------------------------------------------------------------------------------------------------------------------------------------------------------------------------------------------------------------------------------------------------------------------------------------------------------------------------------------------------|
| <p>CRISPR-<br/><i>Cas<math>\pi</math></i>-4<br/>cassette from<br/><i>Cas<math>\pi</math></i> gene to<br/>the last repeat.</p> | <p>CGTCACCTGGAGTCGGAGCGCGGGCGGCGTGACTTT<br/>CAATCGCTGCACTTTCTTCTTCATAAAATTGAAGTTG<br/>AACGAAACGATCTGTACCGAAATCTTTACCAGAACG<br/>AAGGGCACGAGTCGTATGTGCCAAAGCCAGGTAAGA<br/>CGAAACATAGGAAAGAACTTTCTTTGCCATCCACAG<br/>AGTTACCGTCTCCACCTGATGAGAAGAAAGGGCCCC<br/>GGCCAAAAAGAGTCGCTATGTGATTCCCCAGCCCCG<br/>TACCTGGAATCAATCTCCCACGATTGATCAATAGATT<br/>CGGTAATCGGATCAAAAGTCCGAATCGGATCAAGA<br/>AGGCAGATTTTGGACTTCAGCGCCTTTCATCGAAGTT<br/>GAGCTGCCTATGCTTAATGCCCATCGAGTCATAAAG<br/>GCGTTGATGCGATTTCGTTGAGAAAGACGAGCGTTTCG<br/>GTTGTCCGAACATGGGCTGTGACCAAGTTTGGCAGC<br/>ATTGAGGCCGCCAGAGAAGTCCTGCTAGCAGGAGCT<br/>TTGCTGCAAAGAGAGCCGGAAATCATGAGAGGCTTC<br/>CTCCAGAATATTGACCCCTGGGGGAGTTTGAGCGAT<br/>GAGGAACTCATTTCGCGATGAAAAAGCGTGCCGGACG<br/>GTGAAGCTCCTAGCCCAAAGAATTGGGTGGATCAA<br/>ATCGCGAAGTCGATCAAGGACTCGGCGCCTAAGGGC<br/>GTAGATAAAGACACTTTGGATCGTCGCCTGCGGAGT<br/>GGCTTAAAAGCATTCCATTCTGCGGCAAATTCAGGA<br/>AAACACACGAATCCCCAGTTTCCCTATTTGACATCGG<br/>AGAAACCGTCCGCGAACTTTGAATCAGTTGTCGACT<br/>CTGTGCTTGAGTTCCTCGATCTGGAGGACAAGGATC<br/>GATACACGATTGCGAAGGTTGACGACAAGAAACGCC<br/>ACCGAGTGACGGCTCTGCAAAGGAGCTAGGCCAAG<br/>CCAAACCACGTGTAAGGTTGGAGCAGGAACGTAGCA<br/>GGTGGGCTGGCCACTCGTATCTCCAAGGGACCATTA<br/>CCAGGAAAAGGCAGGCTTCCCTCGTTTGGGATGGTC<br/>ACCGAACGGAGAACGGTTTGGCTCTCGCCATCCCAT<br/>TAGATGGCATGCCGAAAATTGACGTGCAGCGATATA<br/>TGTATCAAGATGGCACCTCCCTTCTCTCGGATCGGCA<br/>AATTACTTCCAAGACCAAGTCCGAGGGTAAGGACTG<br/>TGCCTTGATGCCTCTACGATTTAAGCATGCCTTTCTT<br/>CGATGGTATAACGAAACACGTCGAAAATCACGTGGCC<br/>GAGGCCCTTTGGAACGGCGATGCATTCATAACACA<br/>ACGCAGTTTGTATCGTCGACCCAGAAGGAAAGCAT<br/>CCTCGGCTGTTTCATCCGACCTGTCTTCAAATTCTATG<br/>ACTCTAATAAGACAATACAGAACAGTAACGCCCCCT<br/>GGTGCAAACCGCAGTGTGATACCTTATCGGCATTG<br/>ATCGGGGCATCAACTACGTGCTACGAGCGGTTGTTG<br/>TAGATACTGAAGAGAAAGCCGTAATCGACGACATCC<br/>CTCTACCGGGTCGAAAGCGGGAGTGGCGAGCCATTC<br/>GGCAAGAGATCGCGTACTTTCAGCGCATGCGGGACC</p> |
|-------------------------------------------------------------------------------------------------------------------------------|--------------------------------------------------------------------------------------------------------------------------------------------------------------------------------------------------------------------------------------------------------------------------------------------------------------------------------------------------------------------------------------------------------------------------------------------------------------------------------------------------------------------------------------------------------------------------------------------------------------------------------------------------------------------------------------------------------------------------------------------------------------------------------------------------------------------------------------------------------------------------------------------------------------------------------------------------------------------------------------------------------------------------------------------------------------------------------------------------------------------------------------------------------------------------------------------------------------------------------------------------------------------------------------------------------------------------------------------------------------------------------------------------------------------------------------------------------------------------------------------------------------------------------------------------------------------------------------------------------------------------------------------------------------------------------------------------------------------------------------------------------------------------------------------------------------------------------------------------------------------------------------|

|  |  |                                                                                                                                                                                                                                                                                                                                                                                                                                                                                                                                                                                                                                                                                                                                                                                                                                                                                                                                                                                                                                                                                                                                                                                                                                                                                                                                                                                                                                                                                                                                                                                                                                                                                                                                                                                                                                           |
|--|--|-------------------------------------------------------------------------------------------------------------------------------------------------------------------------------------------------------------------------------------------------------------------------------------------------------------------------------------------------------------------------------------------------------------------------------------------------------------------------------------------------------------------------------------------------------------------------------------------------------------------------------------------------------------------------------------------------------------------------------------------------------------------------------------------------------------------------------------------------------------------------------------------------------------------------------------------------------------------------------------------------------------------------------------------------------------------------------------------------------------------------------------------------------------------------------------------------------------------------------------------------------------------------------------------------------------------------------------------------------------------------------------------------------------------------------------------------------------------------------------------------------------------------------------------------------------------------------------------------------------------------------------------------------------------------------------------------------------------------------------------------------------------------------------------------------------------------------------------|
|  |  | TCTCCAAGAGTGCCCAAGAAAGGAACCGCTATGTGG<br>TTGCGCTTGCCAAAGCTCGTAGGAAAGATCGCAGCT<br>TGGGCAAGACAGAGACGGTTGAGGCTGTTGCAAAAC<br>TTGTTCAGAATTGCAGCGAGAGATTTGGGGAAGGAA<br>ACTACTGCTTCGTGTTGGAGAACCTTGAGTTAGGTGC<br>TCTTAACTTAAAAAGAAATAACCGAGTTAAACATCT<br>CGCTCCATGGAAGAGGCATTGATCTATCAGATGCG<br>GAAAAGAGGCTACTTCTACAACCTCCCGATCGAACCG<br>GGTGGATGGTGTTTCGTTGGGAAGCCGCACGCTATAC<br>AAGTCAAGTTTCTCCGTTTGGCTGGTGGGCCAAGCGC<br>GATGAAGTGGAGAAGGCCAAGAAACAAGATAAAAG<br>CATGGCGATTGGCCGCAAGATTGGCGAGGGATATGA<br>AGGTCCGCAGGACGATGAAATAGAAAGTCATTTCGAC<br>TATCTATCGGCAGGGCAGATGGATGAACTCAGAAA<br>TGAAGAAGGAAAGGCCTACGGAAGAAGTCGGTTTGT<br>GGTTCAGCCGGAAGACTTGGACCCTGCACAACCCAG<br>AAGGTTCAAGTTGGGGAAGTGAACTTTTCTGGGATCCC<br>TATCAAAAGGAATTTAAAGGAAAGTCCTTCTCTCAA<br>GGCGTTGTGTTGGATGCTGATTTTGTGGGAGCCCTAA<br>ACATTGCCCTTCGGCCACTAGTCAACGACGGCAAAG<br>GCAAAGGTTTCACCACCGCGATGATGGCGGAAGCAC<br>ATGTCAAGTTGAACCCGACCTTTGAGATCCGTTGCAA<br>GATCCCGGTTTACGAATTTATCGCTGAGAACGACAA<br>TTCTCGTGCCGCGCTGAGAAGGATTGTGATATAGTTT<br>CTAAGTTCATCTCGATGCGGAACGGATACTACGCT<br>GTAGTCTATACGACACGAGTGATAGCCCTGCGGGGT<br>TCGCCCCTAAGTCCGTATGACAAGCCTCTTTCAGGCG<br>GTGGACTTCTAAGAGTGCTGGTGGGTGGAATCCCTA<br>AGCCACCCACCTCCTTCACAATCTGGCAGAATCACG<br>AGTTCATTAAGAAAAGGTGACGTTAACCTAATTTGT<br>GCGTTACGAAATTGTTGATGGTTATGGTAGCCAGGTC<br>CTCAAGCATAGCGAGCGTCTCGTACTTCGCATCCCTT<br>CTGCCCTAGATAAGAATATTAAGCGGGAAGTGCCTG<br>TCCTCCATCTGGACCATCTGCTTGTGGGGACAAAGG<br>GAGTGCTCGTATCGAGCGATGCCCTTGCCTTATGCTG<br>CGAGCGAGGTATTCCCGTTACGGTTGTCGATTGGAG<br>GGGGCGTCCCGTAGGAAGGTTCCGGTAGCCCCGCGCT<br>TCACGGCTCCGCCATATTCGCCGAGCTCAGCTCGAG<br>GCCTTTGACGCCAATTTAGGCGCTGAGTTCGCTCGGG<br>AAGTCGTCTGCGGGAAGCTCTTGAATCAAGCTGACA<br>ATCTTCGATATTTTGGCAAAAATCGAAAGACTCGCG<br>ACCCCGCGCAACACGAACTGCTTGAGACCTCGGCAG<br>ATGATATCAATGAGATTTCAAAAAGAGCTTCCTGTAT<br>CTCTGAAAAGTGCGCGAATACAGCACGGTTGCCGTT |
|--|--|-------------------------------------------------------------------------------------------------------------------------------------------------------------------------------------------------------------------------------------------------------------------------------------------------------------------------------------------------------------------------------------------------------------------------------------------------------------------------------------------------------------------------------------------------------------------------------------------------------------------------------------------------------------------------------------------------------------------------------------------------------------------------------------------------------------------------------------------------------------------------------------------------------------------------------------------------------------------------------------------------------------------------------------------------------------------------------------------------------------------------------------------------------------------------------------------------------------------------------------------------------------------------------------------------------------------------------------------------------------------------------------------------------------------------------------------------------------------------------------------------------------------------------------------------------------------------------------------------------------------------------------------------------------------------------------------------------------------------------------------------------------------------------------------------------------------------------------------|

|  |  |                                                                                                                                                                                                                                                                                                                                                                                                                                                                                                                                                                                                                                                                                                                                                                                                                                                                                                                                                                                                                                                                                                                                                                                                                                                                                                                                                                                                                                                                                                                                                                                                                                                                                                                                                                                                                                               |
|--|--|-----------------------------------------------------------------------------------------------------------------------------------------------------------------------------------------------------------------------------------------------------------------------------------------------------------------------------------------------------------------------------------------------------------------------------------------------------------------------------------------------------------------------------------------------------------------------------------------------------------------------------------------------------------------------------------------------------------------------------------------------------------------------------------------------------------------------------------------------------------------------------------------------------------------------------------------------------------------------------------------------------------------------------------------------------------------------------------------------------------------------------------------------------------------------------------------------------------------------------------------------------------------------------------------------------------------------------------------------------------------------------------------------------------------------------------------------------------------------------------------------------------------------------------------------------------------------------------------------------------------------------------------------------------------------------------------------------------------------------------------------------------------------------------------------------------------------------------------------|
|  |  | GATGACCTTAGAAGCCGAAGGCGCTCGTATCTATTG<br>GTCCGCCCTCTCGGCCTCTATGGGACAAGATCCGG<br>ATTCGCTCGGCGGGAGCAAAGAGGCACGAGAGACCC<br>CGTAAACGCCGCGCTCAACTACGCCTATGGAGTACT<br>CAATGGCGAGGTGTGGAACGCCGTGGTCCTGGCTGG<br>GCTAGAGCCATACGCCGATTGTTGCACGTTGACCG<br>GCCCCGAAGACTTTCGTTTGTCTTGACCTGATGGAA<br>GAGTTTCGCCCATTATCGCGGATCGCCTCGTCTTTG<br>GTCTTGCGGCTAAGGGTTGGAAAATCGGTCAAGAGG<br>AGAACGGATGGCTGGATTTTGCCACCAAGCAGAGAC<br>TGCTTAAAGCGATTTCCGAGCGGTGGGATGCACGCG<br>TTAACTATCAAGGACGAAAAATTCGCCTGAGAAGTG<br>TGCTTCAACTTCAAGCCAGAGATGCCGCTCGCCACTT<br>CCTCGGTCGCGCCAATATCGTGCTTTTCGACAAAGG<br>TGGTAATGAGATGAAGTGGCTCGTTTGTTACGATATC<br>GAAAAGGACAGCGTTCGGCAGAAGATTGCCGACTTT<br>TGTCTGGATAAAGGACTCGAACGTGTCCAGTACAGC<br>GTCTTCCTGGGCGATATGAATCAAACGTTGGCGTTTG<br>ATCTCGCCGCTCAGATTCGTCGTCGAATGGGTGATCA<br>TCCAGGTCAAGTCCGATTTATTCCTATCTGCGACCGT<br>GATTGGAAAAAGACCTTTCGGATTCAGATAGGCAAC<br>TACATGGGAGTTAAGCCTAGCAATGGTAAATGAAAC<br>TCATCCCTACGCGCAGGCGGATATTGTTAGTGTGAGT<br>GAATTAAGGCAGTGGAGCTATTGTCCCCGGGTCGTTT<br>GGTATGGCCGTTCAATGGGCGATTACCGCCCAACAA<br>GCGGAGCTATGAAAGCAGGCATTGATGCAGAGGCAG<br>AGCGTCAAAGGTTGGAAACTCGCCGAGGTTTTTCGC<br>AGTATGGGATCACCGCCGTTGACAAAAGATTCCAGT<br>TTTCAGTTCGTTTCGGATTCGCTTGGGCTTGCCGGAAG<br>AATAGATTGCCTGATCGAGACAACCGATGTAACTTTT<br>GAGGAAGCCCAAGCGGGCTACGCCCCAACGAATGG<br>AATTGGGATGATCCTCTCTTTGTGCCCGTGGAGTACA<br>AGACAACGTTCCGGGTTCAACAAAAGCACAAACGTC<br>TGCAGCTTGCGGCTTATGCCCGAATGCTGGAGAGTCT<br>AACAGGAAGTGCCTGCGGTTTCGGATTCATTGTGAT<br>GCTGCCCCAAGAAGAGGTTCTTAAGATTGAGATAAG<br>TTCCGAGATCAAGCGGTCACCTCGACTTCTTAATCGAA<br>GAAGTTCAAAGAGGCTTGGTGTGCGGATGAACTTCCC<br>AGGCCACCCCGCACTCGGGCAAGTGTCAAAACTGC<br>GAGTTTCGTCGATTTTGCAACGACGTTTGGTGAGACC<br>TTCGAAACCTTGTTGATGGCCGATTGCATCGGCAGAT<br>GTGCGAATCTGAACTACATCGTTCTGCGAATTGAGCC<br>TCGTGAGCGCTCCCAGGTAGATCAGTTTCGCCTGATGT<br>TCGAGCTTTCCTAACGTCAAATCTTTGATTCTATGCT |
|--|--|-----------------------------------------------------------------------------------------------------------------------------------------------------------------------------------------------------------------------------------------------------------------------------------------------------------------------------------------------------------------------------------------------------------------------------------------------------------------------------------------------------------------------------------------------------------------------------------------------------------------------------------------------------------------------------------------------------------------------------------------------------------------------------------------------------------------------------------------------------------------------------------------------------------------------------------------------------------------------------------------------------------------------------------------------------------------------------------------------------------------------------------------------------------------------------------------------------------------------------------------------------------------------------------------------------------------------------------------------------------------------------------------------------------------------------------------------------------------------------------------------------------------------------------------------------------------------------------------------------------------------------------------------------------------------------------------------------------------------------------------------------------------------------------------------------------------------------------------------|



|  |  |                                                                                                                                                                                                                                                                                                                                                                                                                                                                                                                                                                                                                                                                                                                                                                                                                                                                                                                                                                                                                                                                                                                                                                                                                                                                                                                                                                                                                                                                                                                                                                                                                                                                                                                                                                                                                          |
|--|--|--------------------------------------------------------------------------------------------------------------------------------------------------------------------------------------------------------------------------------------------------------------------------------------------------------------------------------------------------------------------------------------------------------------------------------------------------------------------------------------------------------------------------------------------------------------------------------------------------------------------------------------------------------------------------------------------------------------------------------------------------------------------------------------------------------------------------------------------------------------------------------------------------------------------------------------------------------------------------------------------------------------------------------------------------------------------------------------------------------------------------------------------------------------------------------------------------------------------------------------------------------------------------------------------------------------------------------------------------------------------------------------------------------------------------------------------------------------------------------------------------------------------------------------------------------------------------------------------------------------------------------------------------------------------------------------------------------------------------------------------------------------------------------------------------------------------------|
|  |  | GTATCCTAATATCGAACCAACTGTTGGCTTCGCACAT<br>CAAGGCACCTTGATAGGTTAATTGTGGATTTGAAA<br>ATTGCCCCTTCTACTTGTTAGGGACAAGTTGGGCGAG<br>AGTTTGTATGACGCCTCAGTTCAAATGAGAACGGTC<br>GCATGAGGCGAGAAGCACTCTTAGGGAATGAAAGCG<br>CTCTTGGCGTGCCATGCCCCGAGTTGTGGGCGGTCA<br>GTCGCATGAGGCGAGAAGCACTCTTAGGGAATGAAA<br>GGCCATTCTCCTCAGGATTCAGAAGCTCGGGGAAT<br>TGTCGCATGAGGCGAGAAGCACTCTTAGGGAATGAA<br>AGTTCAAGAAGGCATCAGACGAGTACTTCGCCGCC<br>GTCGCATGAGGCGAGAAGCACTCTTAGGGAATGAAA<br>GAAGATTCGCGCTATTACTACGCGTCTTGGTGCTGA<br>CGTCGCATGAGGCGAGAAGCACTCTTAGGAAATGAA<br>AGTTCCATCGTCCATCGGTGCCCGAGGGGTCCAAAC<br>TTCGTCGCATGAGGCGAGAAGCACTCTTAGGGAATG<br>AAAGCGAGATCGGTTTCGAGATCGTCCTTGGGCTTG<br>CCCGTCGCATGAGGCGAGAAGCACTCTTAGGGAATG<br>AAAGAATCAATGATCCCCGGCACTCTTTAGGAGTG<br>TCCATGTCGCATGAGGCGAGAAGCACTCTTAGGGAA<br>TGAAAGTGGAAGATCTGAACGTCGCGCTGCTAAAT<br>GGCAGTGTGCATGAGGCGAGAAGCACTCTTAGGGA<br>ATGAAAGCTCTTGAGCTTTGGCCGCTTCCAGGTCAGT<br>ATCAGTCGCATGAGGCGAGAAGCACTCTTAGGGAAT<br>GAAAGATGATCAAATGCACTCGCAAGGATTGTGACA<br>ACTGGATCGTCGCATGAGGCGAGAAGCACTCTTAGG<br>GAATGAAAGAACGAGCAACCGGCAGTAGAGCTTCTT<br>GAGACTGATGTGCATGAGGCGAGAAGCACTCTTAG<br>GGAATGAAAGGTGAGAATGCCATGACGATGGACGC<br>GCGGCGGTCTGTCGCATGAGGCGAGAAGCACTCTTAG<br>GGAATGAAAGAAATCGAGTTGTCAAGGATTACTTGA<br>CAATTGAGAAAGTCGCATGAGGCGAGAAGCACTCTT<br>AGGGAATGAAAGTGTTTCGCAGATTCAGGCAGGACT<br>TGCGACATCTTCAGCATTGTGCATGAGGCGAGAAG<br>CACTCTTAGGGAATGAAAGAGCAGCCGCCGACCCGT<br>TGCCCCTCCGACTCCAGCGTTCGCATGAGGCGAGAA<br>GCACTCTTAGGGAATGAAAGCCCAGAGGGCGGTAA<br>AGAGCCCCATCTCTCGCAAGGTTCGCATGAGGCGAGA<br>AGCACTCTTAGGGAATGAAAGGTGGTCAACCGATGGT<br>GGAGTCAAGAAAACAGTCGGTAGTCGCATGAGGCGA<br>GAAGCACTCTTAGGGAATGAAAGAAGAGAGCGATG<br>CGGCCTGTCAAAGTAGCTCCATCCGTCGCTTGAGGC<br>GAGAAGCACTCTTAGGGAATGAAAGACCTACGCTTG<br>CTTGGTCGCCAGTTGTTTCTAGTCGCATGAGGCGAGA<br>AGCACTCTTAGGGAATGAAAGCGCGAAGTCGTCTTC |
|--|--|--------------------------------------------------------------------------------------------------------------------------------------------------------------------------------------------------------------------------------------------------------------------------------------------------------------------------------------------------------------------------------------------------------------------------------------------------------------------------------------------------------------------------------------------------------------------------------------------------------------------------------------------------------------------------------------------------------------------------------------------------------------------------------------------------------------------------------------------------------------------------------------------------------------------------------------------------------------------------------------------------------------------------------------------------------------------------------------------------------------------------------------------------------------------------------------------------------------------------------------------------------------------------------------------------------------------------------------------------------------------------------------------------------------------------------------------------------------------------------------------------------------------------------------------------------------------------------------------------------------------------------------------------------------------------------------------------------------------------------------------------------------------------------------------------------------------------|

|  |  |                                                                                                                                                                                                                                                                                                                                                                                                                                                                                                                                                                                                                                                                                                                                                                                                                                                                                                                                                                                                                                                                                                                                                                                                                                                                                                                                                                                                                                                                    |
|--|--|--------------------------------------------------------------------------------------------------------------------------------------------------------------------------------------------------------------------------------------------------------------------------------------------------------------------------------------------------------------------------------------------------------------------------------------------------------------------------------------------------------------------------------------------------------------------------------------------------------------------------------------------------------------------------------------------------------------------------------------------------------------------------------------------------------------------------------------------------------------------------------------------------------------------------------------------------------------------------------------------------------------------------------------------------------------------------------------------------------------------------------------------------------------------------------------------------------------------------------------------------------------------------------------------------------------------------------------------------------------------------------------------------------------------------------------------------------------------|
|  |  | <p>GTGGTAGCGGTGGAACATGACGTCGCATGAGGCGAG<br/>AAGCACTCTTAGGGAATGAAAGTTGTACCAGTCCGG<br/>GCGTGTGCCGATCTCCTGGGTTGGTCGCATGAGGCG<br/>AGAAGCACTCTTAGGGAATGAAAGAACTTTTCGTCC<br/>AGTCGTACGTCGATGATATCGAAAAGTCGCATGAG<br/>GCGAGAAGCACTCTTAGGGAATGAAAGGGAGGAAG<br/>CGCTCCCCTCCGGTCTTGAGCGAGGTTCGCATGA<br/>GGCGAGAAGCACTCTTAGGGAATGAAAGATTGTGCC<br/>GCCAGGTGCATCCCCTGGACTGCTTATGGCGTCGCAT<br/>GAGGCGAGAAGCACTCTTAGGGAATGAAAGCCTCAC<br/>GCAAAACGTTTATGCCCCGGTCTCGCTTCTGTGCGC<br/>ATGAGGCGAGAAGCACTCTTAGGGAATGAAAGGCTC<br/>GATCAAGGCCATGGCCAAGGAACCTCGGTGTCCGTCG<br/>CATGAGGCGAGAAGCACTCTTAGGGAATGAAAGCGC<br/>ACAACCTCGGGCTAGAATCAAGCGGGGATGCCGAGTC<br/>GCATGAGGCGAGAAGCACTCTTAGGGAATGAAAGA<br/>ACTTGCACCTGTGGACGTGCCTGCAAAAAGTCTGT<br/>GTCGCATGAGGCGAGAAGCACTCTTAGGGAATGAAA<br/>GTTGGACCTCAGTGTCTAAGTTGTTGGACGCAAGCGT<br/>AGCATGAGGCGAGAAGCACTCTTAGGGAATGAAAGT<br/>TATGACGCAGCGAGGGCTCACCTTTGATCGCTACGTC<br/>GCATGAGGCGAGAAGCACTCTTAGGGAATGAAAGA<br/>AGCAAAACGAAGATCGTTGCCCTCGTCGACTCTGGT<br/>CGTCGCATGAGGCGAGAAGCACTCTTAGGGAATGAA<br/>AGTGGAGAGGCTGGCTACATCGTTGGGAACAACCTG<br/>GGTCGCATGAGGCGAGAAGCACTCTTAGGGAATGAA<br/>AGAACGTCTGTAAGTGGGGCTGATCTTGCGGTGTTTT<br/>ATGTCGCATGAGGCGAGAAGCACTCTTAGGGAATGA<br/>AAGCTAGTAGTTCGTCGATGTTTCATCTCAACTCCCAG<br/>GCCGTCGCATGAGGCGAGAAGCACTCTTAGGGAATG<br/>AAAGGCAGAACATTTGAACTCGGCGGCGACTTACA<br/>TCCTGGTCGCATGAGGCGAGAAGCACTCTTAGGGAA<br/>TGAAAGTTACAGATAGGGCAAACAAATTTCCAGTCA<br/>TAGAAGTCGGTCGCATGAGGCGAGAAGCACTCTTAG<br/>GGCACCTGA</p> |
|--|--|--------------------------------------------------------------------------------------------------------------------------------------------------------------------------------------------------------------------------------------------------------------------------------------------------------------------------------------------------------------------------------------------------------------------------------------------------------------------------------------------------------------------------------------------------------------------------------------------------------------------------------------------------------------------------------------------------------------------------------------------------------------------------------------------------------------------------------------------------------------------------------------------------------------------------------------------------------------------------------------------------------------------------------------------------------------------------------------------------------------------------------------------------------------------------------------------------------------------------------------------------------------------------------------------------------------------------------------------------------------------------------------------------------------------------------------------------------------------|
