# Supplementary material
Source: PubMed Central journal article supplement (PMC9977741)
Supplement: 41422_2022_771_MOESM14_ESM.pdf [file 41422_2022_771_MOESM14_ESM.pdf]

**Table S3 The top 100 PAMs ranked by fold-change.**

| PAM preference of Cas $\pi$ -1 |             |             |             |             |             |
|--------------------------------|-------------|-------------|-------------|-------------|-------------|
| 50 mM NaCl                     |             | 150 mM NaCl |             | 300 mM NaCl |             |
| PAM                            | Fold change | PAM         | Fold change | PAM         | Fold change |
| TCCCC                          | 10.42       | TGCCC       | 13.28       | TGCCC       | 27.76       |
| GTCCC                          | 9.99        | TCCCC       | 13.17       | TACCC       | 26.72       |
| TTCCT                          | 9.74        | GTCCC       | 13.01       | GACCC       | 26.44       |
| TGCCC                          | 9.71        | TACCC       | 12.56       | TGCCT       | 26.39       |
| GACCT                          | 9.68        | GACCG       | 12.37       | GACCT       | 26.02       |
| TACCG                          | 9.65        | AACCT       | 12.08       | TACCT       | 25.43       |
| TACCC                          | 9.64        | AACCC       | 12.03       | TTCCC       | 25.23       |
| TTCCC                          | 9.59        | TTCCC       | 11.99       | AACCT       | 25.22       |
| GACCC                          | 9.58        | GGCCT       | 11.98       | GGCCT       | 24.95       |
| GGCCT                          | 9.56        | TGCCT       | 11.98       | TCCCC       | 24.90       |
| AGCCC                          | 9.50        | GACCC       | 11.96       | TTCCT       | 24.64       |
| GGCCC                          | 9.48        | GGCCC       | 11.93       | AACCC       | 24.58       |
| TGCCT                          | 9.44        | AGCCC       | 11.88       | TCCCT       | 24.26       |
| AACCC                          | 9.39        | TACCA       | 11.83       | GTCCT       | 24.15       |
| TTCCG                          | 9.35        | ACCCC       | 11.76       | GGCCC       | 23.99       |
| GTCCT                          | 9.33        | CTCCC       | 11.71       | ATCCC       | 23.99       |
| TACCT                          | 9.29        | ATCCT       | 11.63       | AGCCC       | 23.85       |
| ACCCT                          | 9.27        | TACCG       | 11.62       | ATCCT       | 23.67       |
| TCCCT                          | 9.27        | TTCCT       | 11.59       | GTCCC       | 23.58       |
| AACCT                          | 9.26        | CCCCC       | 11.57       | TACCG       | 23.26       |
| AACCA                          | 9.20        | TCCCT       | 11.56       | AGCCT       | 23.25       |
| GACCA                          | 9.18        | TGCCA       | 11.55       | CTCCC       | 22.62       |
| CTCCC                          | 9.17        | GTCCG       | 11.53       | CACCC       | 22.27       |
| TGCCG                          | 9.10        | ATCCC       | 11.52       | CGCCT       | 21.78       |
| GACCG                          | 9.09        | GCCCC       | 11.51       | CCCCC       | 21.40       |
| GTCCG                          | 9.09        | TACCT       | 11.47       | GCCCT       | 21.35       |
| GCCCC                          | 9.06        | TTCCG       | 11.40       | GACCG       | 21.25       |
| AGCCA                          | 9.04        | ACCCT       | 11.35       | CGCCC       | 20.82       |
| ATCCT                          | 9.04        | GTCCT       | 11.34       | ACCCC       | 20.80       |
| TACCA                          | 9.04        | TGCCG       | 11.33       | CACCT       | 20.61       |
| ATCCC                          | 8.98        | GACCT       | 11.30       | ACCCT       | 20.48       |
| ACCCC                          | 8.95        | AGCCT       | 11.12       | AACCG       | 20.03       |
| CCCCC                          | 8.93        | AACCA       | 10.93       | TGCCG       | 19.88       |
| TTCCA                          | 8.92        | ATCCG       | 10.88       | CTCCT       | 19.62       |
| GCCCG                          | 8.89        | GACCA       | 10.88       | GCCCC       | 19.41       |
| AGCCG                          | 8.87        | CACCC       | 10.85       | CCCCT       | 19.26       |
| TCCCG                          | 8.72        | GGCCG       | 10.84       | TACCA       | 17.08       |
| CACCG                          | 8.69        | AGCCA       | 10.75       | AGCCG       | 16.37       |

|       |      |       |       |       |       |
|-------|------|-------|-------|-------|-------|
| TGCCA | 8.66 | AGCCG | 10.75 | ATCCG | 16.32 |
| AACCG | 8.65 | CACCG | 10.71 | TTCCG | 15.98 |
| GGCCA | 8.64 | AACCG | 10.68 | CACCG | 15.79 |
| ATCCG | 8.63 | CCCCT | 10.50 | TGCCA | 15.68 |
| GGCCG | 8.62 | CACCT | 10.35 | CGCCG | 15.53 |
| AGCCT | 8.62 | TTCCA | 10.33 | GGCCG | 15.26 |
| GTCCA | 8.56 | CGCCG | 10.29 | GTCCG | 15.19 |
| ATCCA | 8.56 | CACCA | 10.28 | AACCA | 14.96 |
| CACCC | 8.55 | CGCCC | 10.21 | GACCA | 14.70 |
| TCCCA | 8.39 | TCCCG | 10.16 | CACCA | 13.61 |
| CGCCC | 8.31 | ATCCA | 10.15 | AGCCA | 13.33 |
| CGCCT | 8.30 | GCCCT | 10.07 | TTCCA | 13.08 |
| CACCT | 8.19 | CGCCT | 10.04 | TCCCG | 12.92 |
| ACCCG | 8.18 | CTCCT | 9.93  | CGCCA | 12.90 |
| CACCA | 8.16 | GTCCA | 9.91  | GGCCA | 12.73 |
| CTCCG | 8.11 | CGCCA | 9.90  | CTCCG | 12.71 |
| CTCCT | 8.09 | ACCCG | 9.87  | GTCCA | 12.67 |
| ACCCA | 8.05 | CTCCG | 9.87  | ATCCA | 12.54 |
| CCCCT | 7.94 | TCCCA | 9.83  | ACCCG | 12.29 |
| GCCCA | 7.93 | GGCCA | 9.83  | TCCCA | 12.29 |
| CGCCA | 7.93 | GCCCG | 9.66  | GCCCG | 11.36 |
| CGCCG | 7.91 | GCCCA | 9.52  | ACCCA | 11.17 |
| CTCCA | 7.84 | CCCCG | 9.29  | GCCCA | 11.06 |
| CCCCG | 7.79 | CCCCA | 9.01  | CCCCG | 11.03 |
| CCCCA | 7.47 | ACCCA | 8.89  | CTCCA | 10.60 |
| GCCCT | 7.30 | CTCCA | 8.87  | CCCCA | 10.42 |
| ACCTA | 5.68 | GCCTA | 6.81  | TACTC | 2.81  |
| GCCTA | 5.65 | ACCTA | 6.64  | GTACT | 2.77  |
| TACTC | 5.61 | TACTC | 5.77  | TAACT | 2.64  |
| TCCTA | 5.54 | TAACT | 5.73  | GAACT | 2.50  |
| GTACT | 4.94 | GTACT | 5.47  | GCACT | 2.40  |
| TCACT | 4.82 | GATCT | 5.41  | GATCT | 2.32  |
| TAACT | 4.81 | TTACT | 5.31  | TTACT | 2.06  |
| GAACT | 4.71 | GAACT | 5.24  | TCACT | 2.01  |
| TTACT | 4.69 | TCCTA | 5.12  | ATACT | 1.99  |
| GATCT | 4.61 | GCACT | 5.04  | AAACT | 1.83  |
| ACCGA | 4.59 | ATACT | 4.99  | GTACC | 1.82  |
| GCCGA | 4.48 | ACACT | 4.79  | ACACT | 1.80  |
| ATACT | 4.38 | GTACC | 4.67  | AACTC | 1.75  |
| GACTC | 4.31 | TACTT | 4.65  | GCCTA | 1.75  |
| AACTC | 4.20 | TCACT | 4.64  | GACTC | 1.74  |
| GTACC | 4.19 | TGTCT | 4.63  | ACCTA | 1.70  |
| ACACT | 4.17 | ACCGA | 4.58  | GATCC | 1.69  |

|       |      |       |      |       |      |
|-------|------|-------|------|-------|------|
| CACTC | 4.16 | TGACT | 4.56 | TACTT | 1.59 |
| GCACT | 4.13 | AAACT | 4.54 | GAACC | 1.57 |
| AAACT | 4.12 | GATCC | 4.49 | TAACC | 1.57 |
| TCCGA | 4.08 | GGACT | 4.41 | CACTC | 1.51 |
| TGACT | 4.06 | GAACC | 4.35 | TGACT | 1.50 |
| GATCC | 4.03 | GCCGA | 4.33 | TGTCT | 1.40 |
| TGTCT | 3.99 | AACTC | 4.28 | TGCTC | 1.37 |
| GGACT | 3.94 | GACTC | 4.24 | GCACC | 1.31 |
| CCCTA | 3.92 | TGCTC | 4.09 | GGACT | 1.31 |
| GAACC | 3.90 | TATCT | 4.07 | CAACT | 1.30 |
| TACTT | 3.90 | CACTC | 4.07 | GCTCT | 1.28 |
| TGCTC | 3.89 | TAACC | 4.01 | ATACC | 1.26 |
| TATCT | 3.80 | TCTCT | 3.97 | GTTCT | 1.25 |
| AGACT | 3.77 | GTTCT | 3.88 | GACTT | 1.24 |
| CAACT | 3.76 | GACTT | 3.88 | AAACC | 1.19 |
| TCACC | 3.76 | CAACT | 3.83 | TTACC | 1.19 |
| TGACC | 3.75 | ATACC | 3.81 | TCTCT | 1.18 |
| GCACC | 3.74 | AACTT | 3.74 | TATCT | 1.15 |
| GACTT | 3.71 | GCACC | 3.73 | AACTT | 1.15 |

| PAM preference of Cas $\pi$ -2 |             |             |             |             |             |
|--------------------------------|-------------|-------------|-------------|-------------|-------------|
| 50 mM NaCl                     |             | 150 mM NaCl |             | 300 mM NaCl |             |
| PAM                            | Fold change | PAM         | Fold change | PAM         | Fold change |
| TACCC                          | 32.14       | TGCCC       | 30.19       | TGCCC       | 28.17       |
| GTCCC                          | 31.80       | GTCCC       | 29.61       | TACCC       | 27.20       |
| GACCC                          | 31.73       | TACCC       | 29.21       | TTCCC       | 27.09       |
| AGCCC                          | 30.35       | AACCC       | 27.09       | TCCCC       | 26.79       |
| TGCCC                          | 30.27       | GACCC       | 27.02       | GACCC       | 26.39       |
| GGCCC                          | 30.15       | GGCCC       | 26.79       | GGCCC       | 25.94       |
| AACCC                          | 29.18       | AGCCC       | 26.45       | GTCCC       | 25.16       |
| TTCCC                          | 28.05       | TTCCC       | 26.43       | AGCCC       | 24.84       |
| ATCCC                          | 27.76       | TCCCC       | 26.17       | ATCCC       | 24.80       |
| CACCC                          | 26.95       | CTCCC       | 26.05       | AACCC       | 24.18       |
| TCCCC                          | 26.93       | ATCCC       | 25.76       | CCCCC       | 24.16       |
| CTCCC                          | 26.85       | CCCCC       | 25.28       | GGCCT       | 23.99       |
| CGCCC                          | 26.29       | CACCC       | 24.54       | TGCCT       | 23.96       |
| CCCCC                          | 25.99       | AACCT       | 24.06       | TCCCT       | 23.46       |
| GACCT                          | 25.84       | TACCT       | 23.97       | GCCCT       | 23.42       |
| TACCT                          | 25.13       | TGCCT       | 23.71       | GACCT       | 23.42       |
| TGCCT                          | 24.67       | GGCCT       | 23.47       | CTCCC       | 23.25       |
| GGCCT                          | 24.40       | ATCCT       | 23.22       | TTCCT       | 23.13       |
| AACCT                          | 23.81       | ACCCC       | 23.18       | ACCCC       | 23.02       |

|       |       |        |       |        |       |
|-------|-------|--------|-------|--------|-------|
| GTCCT | 23.67 | GACCT  | 23.00 | TACCT  | 22.96 |
| GCCCC | 23.43 | GTCCCT | 22.70 | GTCCCT | 22.59 |
| ACCCC | 23.28 | CGCCC  | 22.47 | CACCC  | 22.55 |
| TTCCT | 23.09 | AGCCT  | 22.38 | AACCT  | 22.46 |
| ATCCT | 22.39 | GCCCC  | 22.26 | GCCCC  | 22.17 |
| AGCCT | 21.85 | TTCCT  | 22.15 | AGCCT  | 21.99 |
| CACCT | 21.50 | ACCCT  | 20.80 | ATCCT  | 21.84 |
| CGCCT | 21.26 | CACCT  | 20.66 | CGCCC  | 21.56 |
| ACCCT | 20.11 | CCCCT  | 20.41 | ACCCT  | 21.28 |
| CTCCT | 20.06 | TCCCT  | 20.33 | CGCCT  | 20.37 |
| TCCCT | 19.78 | CTCCT  | 19.86 | CCCCT  | 20.33 |
| CCCCT | 19.51 | CGCCT  | 19.59 | CTCCT  | 19.33 |
| GCCCT | 18.63 | GCCCT  | 18.85 | CACCT  | 18.96 |
| GACCA | 12.69 | TACCA  | 15.07 | TACCA  | 15.86 |
| TACCA | 12.59 | GACCA  | 13.02 | GACCA  | 13.87 |
| AGCCA | 11.05 | AGCCA  | 12.51 | AGCCA  | 13.47 |
| AACCA | 10.35 | AACCA  | 12.32 | TGCCA  | 13.09 |
| CACCA | 9.97  | TGCCA  | 11.92 | AACCA  | 12.75 |
| CGCCA | 9.77  | CGCCA  | 11.58 | CGCCA  | 12.59 |
| TACTC | 9.59  | CACCA  | 11.54 | CACCA  | 11.98 |
| GGCCA | 9.58  | TACTC  | 10.97 | TACTC  | 11.52 |
| TACCG | 9.57  | TACCG  | 10.82 | GGCCA  | 11.30 |
| TGCCA | 9.29  | GGCCA  | 10.75 | TACCG  | 10.74 |
| GACCG | 7.77  | GACCG  | 9.88  | GTCCA  | 9.36  |
| GTCCA | 7.39  | ATCCA  | 8.81  | ATCCA  | 9.36  |
| GACTC | 7.29  | GTCCA  | 8.67  | GACCG  | 7.97  |
| ATCCA | 7.27  | AGCCG  | 8.25  | CACTC  | 7.85  |
| AGCCG | 6.93  | GACTC  | 8.06  | GACTC  | 7.79  |
| CACTC | 6.83  | TGCTC  | 8.04  | TGCTC  | 7.78  |
| CTCCA | 6.55  | CACTC  | 7.80  | TTCCA  | 7.74  |
| CCCCA | 6.26  | TGCCG  | 7.77  | CTCCA  | 7.53  |
| TGCTC | 6.23  | CCCCA  | 7.50  | AGCCG  | 7.38  |
| GGCCG | 6.14  | CGCTC  | 7.49  | TGCCG  | 7.35  |
| TGCCG | 6.14  | CTCCA  | 7.46  | CGCTC  | 7.32  |
| CGCTC | 6.13  | CACCG  | 7.44  | CCCCA  | 7.25  |
| CACCG | 6.00  | GGCCG  | 7.41  | AACCG  | 6.98  |
| TTCCA | 5.92  | AACCG  | 7.38  | AACTC  | 6.74  |
| AACCG | 5.86  | TTCCA  | 7.16  | GGCCG  | 6.51  |
| ACCCA | 5.55  | GTCCG  | 6.82  | TCCCA  | 6.15  |
| GTCCG | 5.53  | CGCCG  | 6.82  | CGCCG  | 6.10  |
| AACTC | 5.50  | AACTC  | 6.79  | AGCTC  | 6.08  |
| CGCCG | 5.45  | ATCCG  | 6.58  | ACCCA  | 6.06  |
| GCCCA | 5.44  | AGCTC  | 6.40  | ATCCG  | 5.96  |

|          |      |          |      |          |      |
|----------|------|----------|------|----------|------|
| AGCTC    | 5.23 | GCCCA    | 6.37 | CACCG    | 5.93 |
| ATCCG    | 5.23 | ACCCA    | 6.23 | GCCCA    | 5.86 |
| TCCCA    | 5.06 | TCCCA    | 6.11 | GTCTC    | 5.81 |
| GGCTC    | 4.80 | GGCTC    | 5.75 | ATCTC    | 5.68 |
| GTCTC    | 4.59 | GTCTC    | 5.66 | GTCCG    | 5.55 |
| ATCTC    | 4.09 | TTCCG    | 5.05 | GGCTC    | 5.37 |
| TTCCG    | 4.04 | CTCCG    | 4.99 | GTACC    | 4.56 |
| CTCCG    | 4.03 | ATCTC    | 4.81 | TTCCG    | 4.50 |
| CTCTC    | 3.69 | CTCTC    | 4.59 | TTCTC    | 4.42 |
| GTACC    | 3.60 | TTCTC    | 4.23 | CTCTC    | 4.35 |
| TTCTC    | 3.56 | TACTT    | 4.08 | CTCCG    | 4.19 |
| CCCCG    | 3.43 | GTACC    | 4.02 | TGACC    | 4.19 |
| TGACC    | 3.29 | CCCCG    | 3.79 | TGTCC    | 3.62 |
| TCCTC    | 2.94 | TGACC    | 3.66 | TCCTC    | 3.56 |
| CCCTC    | 2.94 | TCCTC    | 3.58 | TACTT    | 3.49 |
| TGTCC    | 2.81 | TGTCC    | 3.44 | CCCCG    | 3.47 |
| TCCCG    | 2.68 | ACCCG    | 3.39 | TCCCG    | 3.19 |
| TACTT    | 2.65 | CCCTC    | 3.28 | CCCTC    | 3.14 |
| ACCCG    | 2.63 | TGCTT    | 3.17 | ACCCG    | 3.14 |
| TTACC    | 2.57 | TCCCG    | 3.10 | TTACC    | 3.02 |
| GCCCG    | 2.49 | GTACTION | 3.05 | GTACTION | 2.97 |
| GTACTION | 2.47 | GCCTC    | 2.92 | TGCTT    | 2.89 |
| GCCTC    | 2.36 | ACCTC    | 2.82 | GCCTC    | 2.87 |
| TGCTT    | 2.35 | CGCTT    | 2.73 | CGACC    | 2.85 |
| CGTCC    | 2.31 | GACTT    | 2.72 | ACCTC    | 2.79 |
| ACCTC    | 2.26 | AGCTT    | 2.71 | GTTCC    | 2.72 |
| GTTCC    | 2.25 | GCCCG    | 2.68 | CGTCC    | 2.51 |
| ATACC    | 2.18 | CGTCC    | 2.63 | ATACC    | 2.47 |
| GACTT    | 2.12 | TTACC    | 2.63 | GTCTT    | 2.40 |
| AGCTT    | 2.05 | GTTCC    | 2.62 | CGCTT    | 2.39 |
| CGACC    | 2.01 | GTCTT    | 2.62 | GCACC    | 2.39 |
| CGCTT    | 1.97 | CGACC    | 2.52 | GCCCG    | 2.37 |
| TCACC    | 1.91 | CACTT    | 2.42 | TTACT    | 2.29 |
| GCACC    | 1.85 | GGCTT    | 2.42 | TCACC    | 2.26 |
| GCTCC    | 1.84 | TTACT    | 2.32 | GGACC    | 2.26 |
| TTACT    | 1.84 | AACTT    | 2.22 | GACTT    | 2.22 |
| GTCTT    | 1.81 | ATACC    | 2.21 | GGTCC    | 2.19 |
| TCTCC    | 1.81 | ATCTT    | 2.20 | AGCTT    | 2.17 |
