# Supplementary material
Source: PubMed Central journal article supplement (PMC9977741)
Supplement: 41422_2022_771_MOESM15_ESM.pdf [file 41422_2022_771_MOESM15_ESM.pdf]

**Table S4 Plasmids generated in this study.**

| ID                                 | Assay                                                           | Features                                                                                                                                                                                                                                                                                                                                                                                                     | Selection marker                                                 |
|------------------------------------|-----------------------------------------------------------------|--------------------------------------------------------------------------------------------------------------------------------------------------------------------------------------------------------------------------------------------------------------------------------------------------------------------------------------------------------------------------------------------------------------|------------------------------------------------------------------|
| pAS001                             | <i>In vitro</i> plasmids cleavage                               | pUC19-backbone derived plasmids containing predicted AGC PAM and a complementary protospacer region.                                                                                                                                                                                                                                                                                                         | Ampicillin                                                       |
| pAS002                             | <i>In vitro</i> plasmids cleavage                               | pUC19-backbone derived plasmids containing predicted CCC PAM and a complementary protospacer region.                                                                                                                                                                                                                                                                                                         | Ampicillin                                                       |
| pAS003                             | <i>In vitro</i> plasmids cleavage, cleavage sites determination | pUC19-backbone derived plasmids containing TGCCC PAM and a complementary protospacer region.                                                                                                                                                                                                                                                                                                                 | Ampicillin                                                       |
| pAS004                             | PAM-depletion                                                   | pUC19-backbone derived plasmids containing five random nucleotides PAM (NNNNN) and a complementary protospacer region.                                                                                                                                                                                                                                                                                       | Ampicillin                                                       |
| pET28a-His-SUMO-Cas $\pi$ -1       | Protein purification                                            | pET28a-backbone derived plasmids containing N-terminal hexa-histidine and a SUMO tagged Cas $\pi$ -1 in MCS (addgene #196029).                                                                                                                                                                                                                                                                               | Kanamycin                                                        |
| pET28a-His-SUMO-Cas $\pi$ -2       | Protein purification                                            | pET28a-backbone derived plasmids containing N-terminal hexa-histidine and a SUMO tagged Cas $\pi$ -2 in MCS (addgene #196030).                                                                                                                                                                                                                                                                               | Kanamycin                                                        |
| pBLO62.5-Cas $\pi$ 1-Dest (p-0380) | Cell genome editing                                             | Plasmid contains <i>Homo sapiens</i> codon optimized Cas $\pi$ -1 driven by CMV promoter. Both N-/ C-termini of Cas $\pi$ -1 fused to a SV40 NLS sequences, C-terminal containing a 2 $\times$ FLAG tag and linked to PuroR via the P2A peptide sequence. U6-promoter activating the guide transcription and a repeat-spacer unit terminated by a poly-T sequence. SapI-GG stuffer spacer (addgene #196033). | Ampicillin ( <i>E. coli</i> )<br>Puromycin ( <i>H. sapiens</i> ) |
| pBLO62.5-Cas $\pi$ 2-Dest (p-0381) | Cell genome editing                                             | Plasmid contains <i>H. sapiens</i> codon optimized Cas $\pi$ -2 driven by CMV promoter. Both N-/ C-termini of Cas $\pi$ -2 fused to a SV40 NLS sequences, C-terminal containing a 2 $\times$ FLAG tag and linked to PuroR via the P2A peptide sequence. U6-promoter activating the guide transcription and a repeat-spacer unit terminated by a poly-T sequence. SapI-GG stuffer spacer (addgene #196035).   | Ampicillin ( <i>E. coli</i> )<br>Puromycin ( <i>H. sapiens</i> ) |
| p-0382                             | Cell genome editing                                             | Plasmid contains <i>H. sapiens</i> codon optimized LbCas12a driven by CMV promoter. Both N-/ C-                                                                                                                                                                                                                                                                                                              | Ampicillin ( <i>E. coli</i> )                                    |

|        |                     |                                                                                                                                                                                                                                                                                                                                                                                                                    |                                                                  |
|--------|---------------------|--------------------------------------------------------------------------------------------------------------------------------------------------------------------------------------------------------------------------------------------------------------------------------------------------------------------------------------------------------------------------------------------------------------------|------------------------------------------------------------------|
|        |                     | termini of Cas12a fused to a SV40 NLS sequences, C-terminal containing a 2×FLAG tag and linked to PuroR via the P2A peptide sequence. U6-promoter activating the guide transcription and a repeat-spacer unit terminated by a poly-T sequence. <i>SapI</i> -GG stuffer spacer.                                                                                                                                     | Puromycin ( <i>H. sapiens</i> )                                  |
| p-0383 | Cell genome editing | Plasmid contains <i>H. sapiens</i> codon optimized Spy <i>Cas9</i> driven by CMV promoter. Both N-/ C-termini of Cas9 fused to a SV40 NLS sequences, C-terminal containing a 2×FLAG tag and linked to PuroR via the P2A peptide sequence. U6-promoter activating the guide transcription and a repeat-spacer unit terminated by a poly-T sequence. <i>SapI</i> -GG stuffer spacer.                                 | Ampicillin ( <i>E. coli</i> )<br>Puromycin ( <i>H. sapiens</i> ) |
| p-0384 | Cell genome editing | Plasmid contains <i>H. sapiens</i> codon optimized <i>Casπ-1</i> driven by CMV promoter. Both N-/ C-termini of <i>Casπ-1</i> fused to a SV40 NLS sequences, C-terminal containing a 2×FLAG tag and linked to PuroR via the P2A peptide sequence. U6-promoter activating the guide transcription and a repeat-spacer unit terminated by a poly-T sequence. MYH8 exon region targeting guide # <i>π</i> -sg1 spacer. | Ampicillin ( <i>E. coli</i> )<br>Puromycin ( <i>H. sapiens</i> ) |
| p-0385 | Cell genome editing | Plasmid contains <i>H. sapiens</i> codon optimized <i>Casπ-1</i> driven by CMV promoter. Both N-/ C-termini of <i>Casπ-1</i> fused to a SV40 NLS sequences, C-terminal containing a 2×FLAG tag and linked to PuroR via the P2A peptide sequence. U6-promoter activating the guide transcription and a repeat-spacer unit terminated by a poly-T sequence. MYH8 exon region targeting guide # <i>π</i> -sg2 spacer. | Ampicillin ( <i>E. coli</i> )<br>Puromycin ( <i>H. sapiens</i> ) |
| p-0386 | Cell genome editing | Plasmid contains <i>H. sapiens</i> codon optimized <i>Casπ-1</i> driven by CMV promoter. Both N-/ C-termini of <i>Casπ-1</i> fused to a SV40 NLS sequences, C-terminal containing a 2×FLAG tag and linked to PuroR via the P2A peptide sequence. U6-promoter activating the guide transcription and a repeat-spacer unit terminated by a poly-T sequence. MYH8 exon region targeting guide # <i>π</i> -sg3 spacer. | Ampicillin ( <i>E. coli</i> )<br>Puromycin ( <i>H. sapiens</i> ) |
| p-0387 | Cell genome editing | Plasmid contains <i>H. sapiens</i> codon optimized <i>Casπ-1</i> driven by CMV promoter. Both N-/ C-termini of <i>Casπ-1</i> fused to a SV40 NLS sequences, C-terminal containing a 2×FLAG tag and linked to PuroR via the P2A peptide sequence. U6-promoter activating the guide transcription and a repeat-spacer unit                                                                                           | Ampicillin ( <i>E. coli</i> )<br>Puromycin ( <i>H. sapiens</i> ) |

|        |                     |                                                                                                                                                                                                                                                                                                                                                                                                                                                        |                                                                  |
|--------|---------------------|--------------------------------------------------------------------------------------------------------------------------------------------------------------------------------------------------------------------------------------------------------------------------------------------------------------------------------------------------------------------------------------------------------------------------------------------------------|------------------------------------------------------------------|
|        |                     | terminated by a poly-T sequence. MYH8 exon region targeting guide # $\pi$ -sg4 spacer.                                                                                                                                                                                                                                                                                                                                                                 |                                                                  |
| p-0388 | Cell genome editing | Plasmid contains <i>H. sapiens</i> codon optimized <i>Cas<math>\pi</math>-1</i> driven by CMV promoter. Both N-/ C-termini of <i>Cas<math>\pi</math>-1</i> fused to a SV40 NLS sequences, C-terminal containing a 2 $\times$ FLAG tag and linked to PuroR via the P2A peptide sequence. U6-promoter activating the guide transcription and a repeat-spacer unit terminated by a poly-T sequence. MYH8 exon region targeting guide # $\pi$ -sg5 spacer. | Ampicillin ( <i>E. coli</i> )<br>Puromycin ( <i>H. sapiens</i> ) |
| p-0389 | Cell genome editing | Plasmid contains <i>H. sapiens</i> codon optimized <i>Cas<math>\pi</math>-2</i> driven by CMV promoter. Both N-/ C-termini of <i>Cas<math>\pi</math>-2</i> fused to a SV40 NLS sequences, C-terminal containing a 2 $\times$ FLAG tag and linked to PuroR via the P2A peptide sequence. U6-promoter activating the guide transcription and a repeat-spacer unit terminated by a poly-T sequence. MYH8 exon region targeting guide # $\pi$ -sg1 spacer. | Ampicillin ( <i>E. coli</i> )<br>Puromycin ( <i>H. sapiens</i> ) |
| p-0390 | Cell genome editing | Plasmid contains <i>H. sapiens</i> codon optimized <i>Cas<math>\pi</math>-2</i> driven by CMV promoter. Both N-/ C-termini of <i>Cas<math>\pi</math>-2</i> fused to a SV40 NLS sequences, C-terminal containing a 2 $\times$ FLAG tag and linked to PuroR via the P2A peptide sequence. U6-promoter activating the guide transcription and a repeat-spacer unit terminated by a poly-T sequence. MYH8 exon region targeting guide # $\pi$ -sg2 spacer. | Ampicillin ( <i>E. coli</i> )<br>Puromycin ( <i>H. sapiens</i> ) |
| p-0391 | Cell genome editing | Plasmid contains <i>H. sapiens</i> codon optimized <i>Cas<math>\pi</math>-2</i> driven by CMV promoter. Both N-/ C-termini of <i>Cas<math>\pi</math>-2</i> fused to a SV40 NLS sequences, C-terminal containing a 2 $\times$ FLAG tag and linked to PuroR via the P2A peptide sequence. U6-promoter activating the guide transcription and a repeat-spacer unit terminated by a poly-T sequence. MYH8 exon region targeting guide # $\pi$ -sg3 spacer. | Ampicillin ( <i>E. coli</i> )<br>Puromycin ( <i>H. sapiens</i> ) |
| p-0392 | Cell genome editing | Plasmid contains <i>H. sapiens</i> codon optimized <i>Cas<math>\pi</math>-2</i> driven by CMV promoter. Both N-/ C-termini of <i>Cas<math>\pi</math>-2</i> fused to a SV40 NLS sequences, C-terminal containing a 2 $\times$ FLAG tag and linked to PuroR via the P2A peptide sequence. U6-promoter activating the guide transcription and a repeat-spacer unit terminated by a poly-T sequence. MYH8 exon region targeting guide # $\pi$ -sg4 spacer. | Ampicillin ( <i>E. coli</i> )<br>Puromycin ( <i>H. sapiens</i> ) |
| p-0393 | Cell genome editing | Plasmid contains <i>H. sapiens</i> codon optimized <i>Cas<math>\pi</math>-2</i> driven by CMV promoter. Both N-/ C-termini of                                                                                                                                                                                                                                                                                                                          | Ampicillin ( <i>E. coli</i> )                                    |

|        |                     |                                                                                                                                                                                                                                                                                                                                                                                                          |                                                                  |
|--------|---------------------|----------------------------------------------------------------------------------------------------------------------------------------------------------------------------------------------------------------------------------------------------------------------------------------------------------------------------------------------------------------------------------------------------------|------------------------------------------------------------------|
|        |                     | Cas $\pi$ -2 fused to a SV40 NLS sequences, C-terminal containing a 2 $\times$ FLAG tag and linked to PuroR via the P2A peptide sequence. U6-promoter activating the guide transcription and a repeat-spacer unit terminated by a poly-T sequence. MYH8 exon region targeting guide # $\pi$ -sg5 spacer.                                                                                                 | Puromycin ( <i>H. sapiens</i> )                                  |
| p-0394 | Cell genome editing | Plasmid contains <i>H. sapiens</i> codon optimized LbCas12a driven by CMV promoter. Both N-/ C-termini of Cas12a fused to a SV40 NLS sequences, C-terminal containing a 2 $\times$ FLAG tag and linked to PuroR via the P2A peptide sequence. U6-promoter activating the guide transcription and a repeat-spacer unit terminated by a poly-T sequence. MYH8 exon region targeting guide #12a-sg1 spacer. | Ampicillin ( <i>E. coli</i> )<br>Puromycin ( <i>H. sapiens</i> ) |
| p-0395 | Cell genome editing | Plasmid contains <i>H. sapiens</i> codon optimized LbCas12a driven by CMV promoter. Both N-/ C-termini of Cas12a fused to a SV40 NLS sequences, C-terminal containing a 2 $\times$ FLAG tag and linked to PuroR via the P2A peptide sequence. U6-promoter activating the guide transcription and a repeat-spacer unit terminated by a poly-T sequence. MYH8 exon region targeting guide #12a-sg2 spacer. | Ampicillin ( <i>E. coli</i> )<br>Puromycin ( <i>H. sapiens</i> ) |
| p-0396 | Cell genome editing | Plasmid contains <i>H. sapiens</i> codon optimized LbCas12a driven by CMV promoter. Both N-/ C-termini of Cas12a fused to a SV40 NLS sequences, C-terminal containing a 2 $\times$ FLAG tag and linked to PuroR via the P2A peptide sequence. U6-promoter activating the guide transcription and a repeat-spacer unit terminated by a poly-T sequence. MYH8 exon region targeting guide #12a-sg3 spacer. | Ampicillin ( <i>E. coli</i> )<br>Puromycin ( <i>H. sapiens</i> ) |
| p-0397 | Cell genome editing | Plasmid contains <i>H. sapiens</i> codon optimized LbCas12a driven by CMV promoter. Both N-/ C-termini of Cas12a fused to a SV40 NLS sequences, C-terminal containing a 2 $\times$ FLAG tag and linked to PuroR via the P2A peptide sequence. U6-promoter activating the guide transcription and a repeat-spacer unit terminated by a poly-T sequence. MYH8 exon region targeting guide #12a-sg4 spacer. | Ampicillin ( <i>E. coli</i> )<br>Puromycin ( <i>H. sapiens</i> ) |
| p-0398 | Cell genome editing | Plasmid contains <i>H. sapiens</i> codon optimized LbCas12a driven by CMV promoter. Both N-/ C-                                                                                                                                                                                                                                                                                                          | Ampicillin ( <i>E. coli</i> )                                    |

|        |                     |                                                                                                                                                                                                                                                                                                                                                                                               |                                                                  |
|--------|---------------------|-----------------------------------------------------------------------------------------------------------------------------------------------------------------------------------------------------------------------------------------------------------------------------------------------------------------------------------------------------------------------------------------------|------------------------------------------------------------------|
|        |                     | termini of Cas12a fused to a SV40 NLS sequences, C-terminal containing a 2×FLAG tag and linked to PuroR via the P2A peptide sequence. U6-promoter activating the guide transcription and a repeat-spacer unit terminated by a poly-T sequence. MYH8 exon region targeting guide #12a-sg5 spacer.                                                                                              | Puromycin ( <i>H. sapiens</i> )                                  |
| p-0399 | Cell genome editing | Plasmid contains <i>H. sapiens</i> codon optimized SpyCas9 driven by CMV promoter. Both N-/ C-termini of Cas9 fused to a SV40 NLS sequences, C-terminal containing a 2×FLAG tag and linked to PuroR via the P2A peptide sequence. U6-promoter activating the guide transcription and a repeat-spacer unit terminated by a poly-T sequence. MYH8 exon region targeting guide #Cas9-sg1 spacer. | Ampicillin ( <i>E. coli</i> )<br>Puromycin ( <i>H. sapiens</i> ) |
| p-0400 | Cell genome editing | Plasmid contains <i>H. sapiens</i> codon optimized SpyCas9 driven by CMV promoter. Both N-/ C-termini of Cas9 fused to a SV40 NLS sequences, C-terminal containing a 2×FLAG tag and linked to PuroR via the P2A peptide sequence. U6-promoter activating the guide transcription and a repeat-spacer unit terminated by a poly-T sequence. MYH8 exon region targeting guide #Cas9-sg2 spacer. | Ampicillin ( <i>E. coli</i> )<br>Puromycin ( <i>H. sapiens</i> ) |
| p-0401 | Cell genome editing | Plasmid contains <i>H. sapiens</i> codon optimized SpyCas9 driven by CMV promoter. Both N-/ C-termini of Cas9 fused to a SV40 NLS sequences, C-terminal containing a 2×FLAG tag and linked to PuroR via the P2A peptide sequence. U6-promoter activating the guide transcription and a repeat-spacer unit terminated by a poly-T sequence. MYH8 exon region targeting guide #Cas9-sg3 spacer. | Ampicillin ( <i>E. coli</i> )<br>Puromycin ( <i>H. sapiens</i> ) |
| p-0402 | Cell genome editing | Plasmid contains <i>H. sapiens</i> codon optimized SpyCas9 driven by CMV promoter. Both N-/ C-termini of Cas9 fused to a SV40 NLS sequences, C-terminal containing a 2×FLAG tag and linked to PuroR via the P2A peptide sequence. U6-promoter activating the guide transcription and a repeat-spacer unit terminated by a poly-T sequence. MYH8 exon region targeting guide #Cas9-sg4 spacer. | Ampicillin ( <i>E. coli</i> )<br>Puromycin ( <i>H. sapiens</i> ) |

|                                    |                                     |                                                                                                                                                                                                                                                                                                                                                                                               |                                                                  |
|------------------------------------|-------------------------------------|-----------------------------------------------------------------------------------------------------------------------------------------------------------------------------------------------------------------------------------------------------------------------------------------------------------------------------------------------------------------------------------------------|------------------------------------------------------------------|
| p-0403                             | Cell genome editing                 | Plasmid contains <i>H. sapiens</i> codon optimized SpyCas9 driven by CMV promoter. Both N-/ C-termini of Cas9 fused to a SV40 NLS sequences, C-terminal containing a 2×FLAG tag and linked to PuroR via the P2A peptide sequence. U6-promoter activating the guide transcription and a repeat-spacer unit terminated by a poly-T sequence. MYH8 exon region targeting guide #Cas9-sg5 spacer. | Ampicillin ( <i>E. coli</i> )<br>Puromycin ( <i>H. sapiens</i> ) |
| p-0404                             | Cell genome editing                 | Lentiviral expression MCPyV-backbone plasmid containing the <i>MYH8</i> exon (270 bp) from <i>M. musculus</i> with 32 bp random flanking sequence linked to the start codon of <i>EGFP</i> under the control of CMV promoter.                                                                                                                                                                 | Ampicillin ( <i>E. coli</i> )<br>Puromycin ( <i>H. sapiens</i> ) |
| pCDFDuet-Cas $\pi$ 1-Dest (p-0405) | Bacteria plasmid interference assay | Plasmid contains <i>Cas<math>\pi</math>-1</i> under the control of Trc promoter. <i>Cas<math>\pi</math>-1</i> is N-terminally linked to a 6×His tag. Locus for guide expression is controlled by J23119-promoter and constitutes a repeat-spacer unit terminated by a T7 terminator. <i>SapI</i> -GG stuffer spacer (addgene #196031).                                                        | Streptomycin                                                     |
| p-0406                             | Bacteria plasmid interference assay | Plasmid contains <i>Cas<math>\pi</math>-1</i> under the control of Trc promoter. <i>Cas<math>\pi</math>-1</i> is N-terminally linked to a 6×His tag. Locus for guide expression is controlled by J23119-promoter and constitutes a repeat-spacer unit terminated by a T7 terminator. The <i>ccdB</i> gene targeting guide # <i>ccdB</i> -T spacer.                                            | Streptomycin                                                     |
| pCDFDuet-Cas $\pi$ 2-Dest (p-0407) | Bacteria plasmid interference assay | Plasmid contains <i>Cas<math>\pi</math>-2</i> under the control of Trc promoter. <i>Cas<math>\pi</math>-1</i> is N-terminally linked to a 6×His tag. Locus for guide expression is controlled by J23119-promoter and constitutes a repeat-spacer unit terminated by a T7 terminator. <i>SapI</i> -GG stuffer spacer (addgene #196032).                                                        | Streptomycin                                                     |
| p-0408                             | Bacteria plasmid interference assay | Plasmid contains <i>Cas<math>\pi</math>-2</i> under the control of Trc promoter. <i>Cas<math>\pi</math>-1</i> is N-terminally linked to a 6×His tag. Locus for guide expression is controlled by J23119-promoter and constitutes a repeat-spacer unit terminated by a T7 terminator. The <i>ccdB</i> gene targeting guide # <i>ccdB</i> -T spacer.                                            | Streptomycin                                                     |
| p11-LacY-wtx1                      | Bacteria plasmid interference assay | Inducible pBAD promoter activating toxin <i>ccdB</i> expression (addgene #69056). Kind gift from Prof. Wei Li group in the institute of zoology, Chinese Academy of Sciences.                                                                                                                                                                                                                 | Ampicillin                                                       |
| p-0409                             | Cell genome editing                 | Plasmid contains <i>H. sapiens</i> codon optimized <i>Cas<math>\pi</math>-1</i> driven by CMV promoter. Both N-/ C-termini of                                                                                                                                                                                                                                                                 | Ampicillin ( <i>E. coli</i> )                                    |

|        |                     |                                                                                                                                                                                                                                                                                                                                                                                                                           |                                                                  |
|--------|---------------------|---------------------------------------------------------------------------------------------------------------------------------------------------------------------------------------------------------------------------------------------------------------------------------------------------------------------------------------------------------------------------------------------------------------------------|------------------------------------------------------------------|
|        |                     | Cas $\pi$ -1 fused to a SV40 NLS sequences, C-terminal containing a 2 $\times$ FLAG tag and linked to PuroR via the P2A peptide sequence. U6-promoter activating the guide transcription and a repeat-spacer unit terminated by a poly-T sequence. MYH8 exon region targeting guide # $\pi$ -B2M-1 spacer.                                                                                                                | Puromycin ( <i>H. sapiens</i> )                                  |
| p-0410 | Cell genome editing | Plasmid contains <i>H. sapiens</i> codon optimized Cas $\pi$ -1 driven by CMV promoter. Both N-/ C-termini of Cas $\pi$ -1 fused to a SV40 NLS sequences, C-terminal containing a 2 $\times$ FLAG tag and linked to PuroR via the P2A peptide sequence. U6-promoter activating the guide transcription and a repeat-spacer unit terminated by a poly-T sequence. MYH8 exon region targeting guide # $\pi$ -B2M-2 spacer.  | Ampicillin ( <i>E. coli</i> )<br>Puromycin ( <i>H. sapiens</i> ) |
| p-0411 | Cell genome editing | Plasmid contains <i>H. sapiens</i> codon optimized Cas $\pi$ -1 driven by CMV promoter. Both N-/ C-termini of Cas $\pi$ -1 fused to a SV40 NLS sequences, C-terminal containing a 2 $\times$ FLAG tag and linked to PuroR via the P2A peptide sequence. U6-promoter activating the guide transcription and a repeat-spacer unit terminated by a poly-T sequence. MYH8 exon region targeting guide # $\pi$ -TP53-1 spacer. | Ampicillin ( <i>E. coli</i> )<br>Puromycin ( <i>H. sapiens</i> ) |
| p-0412 | Cell genome editing | Plasmid contains <i>H. sapiens</i> codon optimized Cas $\pi$ -2 driven by CMV promoter. Both N-/ C-termini of Cas $\pi$ -2 fused to a SV40 NLS sequences, C-terminal containing a 2 $\times$ FLAG tag and linked to PuroR via the P2A peptide sequence. U6-promoter activating the guide transcription and a repeat-spacer unit terminated by a poly-T sequence. MYH8 exon region targeting guide # $\pi$ -B2M-1 spacer.  | Ampicillin ( <i>E. coli</i> )<br>Puromycin ( <i>H. sapiens</i> ) |
| p-0413 | Cell genome editing | Plasmid contains <i>H. sapiens</i> codon optimized Cas $\pi$ -2 driven by CMV promoter. Both N-/ C-termini of Cas $\pi$ -2 fused to a SV40 NLS sequences, C-terminal containing a 2 $\times$ FLAG tag and linked to PuroR via the P2A peptide sequence. U6-promoter activating the guide transcription and a repeat-spacer unit terminated by a poly-T sequence. MYH8 exon region targeting guide # $\pi$ -B2M-2 spacer.  | Ampicillin ( <i>E. coli</i> )<br>Puromycin ( <i>H. sapiens</i> ) |
| p-0414 | Cell genome editing | Plasmid contains <i>H. sapiens</i> codon optimized Cas $\pi$ -1 driven by CMV promoter. Both N-/ C-termini of Cas $\pi$ -2 fused to a SV40 NLS sequences, C-terminal containing a 2 $\times$ FLAG tag and linked to PuroR via the P2A peptide sequence. U6-promoter activating the guide transcription and a repeat-spacer unit                                                                                           | Ampicillin ( <i>E. coli</i> )<br>Puromycin ( <i>H. sapiens</i> ) |

|  |  |                                                                                           |  |
|--|--|-------------------------------------------------------------------------------------------|--|
|  |  | terminated by a poly-T sequence. MYH8 exon region targeting guide # $\pi$ -TP53-1 spacer. |  |
|--|--|-------------------------------------------------------------------------------------------|--|
