# Supplementary material
Source: PubMed Central journal article supplement (PMC9977741)
Supplement: 41422_2022_771_MOESM16_ESM.pdf [file 41422_2022_771_MOESM16_ESM.pdf]

**Table S5 Oligonucleotides and target sequences used in this study.**

| ID #      | Assay                                                                                                                  | Description                                                                                                                                           | Sequences (5'-3')                                                                          |
|-----------|------------------------------------------------------------------------------------------------------------------------|-------------------------------------------------------------------------------------------------------------------------------------------------------|--------------------------------------------------------------------------------------------|
| oligo-001 | Cy5-labeled dsDNA cleavage of Cas $\pi$                                                                                | Forward PCR primer for cy5-labeled dsDNA target amplification                                                                                         | Cy5-CGGTACCCGGGGATCC                                                                       |
| oligo-002 | Cy5-labeled dsDNA cleavage of Cas $\pi$                                                                                | Reverse PCR primers for cy5-labeled dsDNA target amplification of Cas $\pi$                                                                           | HO-TATGACCATGATTAGGCCAAGCT<br>TGTTACCAGGGTGTGCGCCCTGG<br>GCAGGATCCCCGGGTACCG               |
| oligo-003 | Cy5-labeled dsDNA cleavage, cleavage sites determination and <i>trans</i> -cleavage assay of Cas $\pi$                 | DNA non-target strand containing a TGCCC PAM (blue) and a protospacer region (red) for Cas $\pi$ cleavage assay and cleavage sites determination      | NH <sub>2</sub> -CGGTACCCGGGGATCCTGCCCAG<br>GGCGACACCCTGGTGAACAAGCT<br>TGGCCTAATCATGGTCATA |
| oligo-004 | Cy5-labeled dsDNA cleavage, cleavage sites determination and <i>trans</i> -cleavage assay of Cas $\pi$                 | Non-labelled complementary strand of oligo-003 and oligo-006                                                                                          | OH-TATGACCATGATTAGGCCAAGCT<br>TGTTACCAGGGTGTGCGCCCTGG<br>GCAGGATCCCCGGGTACCG               |
| oligo-005 | Cy5-labeled dsDNA cleavage, ssDNA cleavage, cleavage sites determination and <i>trans</i> -cleavage assay of Cas $\pi$ | DNA target strand for Cas $\pi$ cleavage assay and cleavage sites determination of Cas $\pi$                                                          | NH <sub>2</sub> -TATGACCATGATTAGGCCAAGCT<br>TGTTACCAGGGTGTGCGCCCTGG<br>GCAGGATCCCCGGGTACCG |
| oligo-006 | Cy5-labeled dsDNA cleavage, cleavage sites determination and <i>trans</i> -cleavage assay of Cas $\pi$                 | Non-labelled complementary strand containing a TGCCC PAM (blue) and a protospacer region (red) of oligo-004 and oligo-005.                            | OH-CGGTACCCGGGGATCCTGCCCAG<br>GGCGACACCCTGGTGAACAAGCT<br>TGGCCTAATCATGGTCATA               |
| Oligo-007 | Cy5-labeled dsDNA cleavage and <i>trans</i> -cleavage assay of LbCas12a                                                | Reverse PCR primer for cy5-labeled dsDNA target amplification and non-labelled DNA target strand for Cas12a <i>trans</i> -cleavage assay of LbCas12a. | HO-TATGACCATGATTAGGCCAAGCT<br>TGTTACCAGGGTGTGCGCCCTGA<br>AAAGGATCCCCGGGTACCG               |
| Oligo-008 | <i>Trans</i> -cleavage assay of LbCas12a                                                                               | Non-labelled DNA non-target strand containing a TTTTC PAM (blue) and a protospacer                                                                    | HO-CGGTACCCGGGGATCCTTTTCAG                                                                 |

|           |                                                 |                                                                                                                                 |                                                                                            |
|-----------|-------------------------------------------------|---------------------------------------------------------------------------------------------------------------------------------|--------------------------------------------------------------------------------------------|
|           |                                                 | region (red) for Cas12a <i>trans</i> -cleavage assay.                                                                           | GGCGACACCCTGGTGAACAAGCT<br>TGGCCTAATCATGGTCATA                                             |
| Oligo-010 | <i>Trans</i> -cleavage assay                    | ssDNA substrate.                                                                                                                | NH <sub>2</sub> -<br>CTGAAAACCTCGCAGCTACCTTAA<br>CGGCCGCCATTTCCTATGCGTAC<br>ATCTGGATCAAGCC |
| Oligo-011 | Cas $\pi$ R-loop ternary complex reconstitution | DNA non-target strand containing a TTTTC PAM (blue) and a protospacer region (red) for Cas $\pi$ R-loop complex reconstitution. | HO-<br>CGGGATGCCCAGGGCGACAC<br>AAGTTGTCCAAGATCC                                            |
| Oligo-012 | Cas $\pi$ R-loop ternary complex reconstitution | DNA target strand for Cas $\pi$ R-loop complex reconstitution.                                                                  | HO-<br>GGATCGTTCACCAGGGTGTCCGCC<br>CTGGGCATCCCCG                                           |
| Oligo-013 | Cy5-labeled dsDNA mismatch cleavage assay       | Reverse PCR primes for cy5-labeled dsDNA target amplification and mismatch cleavage assay with mismatch at position 1 (brown).  | HO-<br>TATGACCATGATTAGGCCAAG<br>CTTGTTACCAGGGTGTCCGCC<br>CGGGGCAGGATCCCCGGGTACCG           |
| Oligo-014 | Cy5-labeled dsDNA mismatch cleavage assay       | Reverse PCR primes for cy5-labeled dsDNA target amplification and mismatch cleavage assay with mismatch at position 2 (brown)   | HO-<br>TATGACCATGATTAGGCCAAG<br>CTTGTTACCAGGGTGTCCGCC<br>ATGGGCAGGATCCCCGGGTACCG           |
| Oligo-015 | Cy5-labeled dsDNA mismatch cleavage assay       | Reverse PCR primes for cy5-labeled dsDNA target amplification and mismatch cleavage assay with mismatch at position 3 (brown)   | HO-<br>TATGACCATGATTAGGCCAAG<br>CTTGTTACCAGGGTGTCCGCA<br>CTGGGCAGGATCCCCGGGTACCG           |
| Oligo-016 | Cy5-labeled dsDNA mismatch cleavage assay       | Reverse PCR primes for cy5-labeled dsDNA target amplification and mismatch cleavage assay with mismatch at position 4 (brown)   | HO-<br>TATGACCATGATTAGGCCAAG<br>CTTGTTACCAGGGTGTCCGAC<br>CTGGGCAGGATCCCCGGGTACCG           |
| Oligo-017 | Cy5-labeled dsDNA mismatch cleavage assay       | Reverse PCR primes for cy5-labeled dsDNA target amplification and mismatch cleavage assay with mismatch at position 5 (brown)   | HO-<br>TATGACCATGATTAGGCCAAG<br>CTTGTTACCAGGGTGTCTCC<br>CTGGGCAGGATCCCCGGGTACCG            |

|           |                                           |                                                                                                                                |                                                                                   |
|-----------|-------------------------------------------|--------------------------------------------------------------------------------------------------------------------------------|-----------------------------------------------------------------------------------|
|           |                                           |                                                                                                                                |                                                                                   |
| Oligo-018 | Cy5-labeled dsDNA mismatch cleavage assay | Reverse PCR primes for cy5-labeled dsDNA target amplification and mismatch cleavage assay with mismatch at position 6 (brown)  | HO-TATGACCATGATTAGGCCAAG<br>CTTGTTACCAGGGTGTAGCC<br>CTGGGCAGGATCCCCGGGTAC<br>CG   |
| Oligo-019 | Cy5-labeled dsDNA mismatch cleavage assay | Reverse PCR primes for cy5-labeled dsDNA target amplification and mismatch cleavage assay with mismatch at position 7 (brown)  | HO-TATGACCATGATTAGGCCAAG<br>CTTGTTACCAGGGTGGCGCC<br>CTGGGCAGGATCCCCGGGTAC<br>CG   |
| Oligo-020 | Cy5-labeled dsDNA mismatch cleavage assay | Reverse PCR primes for cy5-labeled dsDNA target amplification and mismatch cleavage assay with mismatch at position 8 (brown)  | HO-TATGACCATGATTAGGCCAAG<br>CTTGTTACCAGGGTTTCGCC<br>CTGGGCAGGATCCCCGGGTAC<br>CG   |
| Oligo-021 | Cy5-labeled dsDNA mismatch cleavage assay | Reverse PCR primes for cy5-labeled dsDNA target amplification and mismatch cleavage assay with mismatch at position 9 (brown)  | HO-TATGACCATGATTAGGCCAAG<br>CTTGTTACCAGGGGGTCGCC<br>CTGGGCAGGATCCCCGGGTAC<br>CG   |
| Oligo-022 | Cy5-labeled dsDNA mismatch cleavage assay | Reverse PCR primes for cy5-labeled dsDNA target amplification and mismatch cleavage assay with mismatch at position 10 (brown) | HO-TATGACCATGATTAGGCCAAG<br>CTTGTTACCAGGTTGTTCGCC<br>CTGGGCAGGATCCCCGGGTAC<br>CG  |
| Oligo-023 | Cy5-labeled dsDNA mismatch cleavage assay | Reverse PCR primes for cy5-labeled dsDNA target amplification and mismatch cleavage assay with mismatch at position 11 (brown) | HO-TATGACCATGATTAGGCCAAG<br>CTTGTTACCAGTGTGTTCGCC<br>CTGGGCAGGATCCCCGGGTAC<br>CG  |
| Oligo-024 | Cy5-labeled dsDNA mismatch cleavage assay | Reverse PCR primes for cy5-labeled dsDNA target amplification and mismatch cleavage assay with mismatch at position 12 (brown) | HO-TATGACCATGATTAGGCCAAG<br>CTTGTTACCA TGGTGTTCGCC<br>CTGGGCAGGATCCCCGGGTAC<br>CG |

|           |                                           |                                                                                                                                |                                                                                   |
|-----------|-------------------------------------------|--------------------------------------------------------------------------------------------------------------------------------|-----------------------------------------------------------------------------------|
| Oligo-025 | Cy5-labeled dsDNA mismatch cleavage assay | Reverse PCR primes for cy5-labeled dsDNA target amplification and mismatch cleavage assay with mismatch at position 13 (brown) | HO-TATGACCATGATTAGGCCAAG<br>CTTGTTACCCGGGTGTCGCC<br>CTGGGCAGGATCCCCGGGTAC<br>CG   |
| Oligo-026 | Cy5-labeled dsDNA mismatch cleavage assay | Reverse PCR primes for cy5-labeled dsDNA target amplification and mismatch cleavage assay with mismatch at position 14 (brown) | HO-TATGACCATGATTAGGCCAAG<br>CTTGTTACAGGGGTGTCGCC<br>CTGGGCAGGATCCCCGGGTAC<br>CG   |
| Oligo-027 | Cy5-labeled dsDNA mismatch cleavage assay | Reverse PCR primes for cy5-labeled dsDNA target amplification and mismatch cleavage assay with mismatch at position 15 (brown) | HO-TATGACCATGATTAGGCCAAG<br>CTTGTTCAACAGGGGTGTCGCC<br>CTGGGCAGGATCCCCGGGTAC<br>CG |
| Oligo-028 | Cy5-labeled dsDNA mismatch cleavage assay | Reverse PCR primes for cy5-labeled dsDNA target amplification and mismatch cleavage assay with mismatch at position 16 (brown) | HO-TATGACCATGATTAGGCCAAG<br>CTTGTTCCCAGGGGTGTCGCC<br>CTGGGCAGGATCCCCGGGTAC<br>CG  |
| Oligo-029 | Cy5-labeled dsDNA mismatch cleavage assay | Reverse PCR primes for cy5-labeled dsDNA target amplification and mismatch cleavage assay with mismatch at position 17 (brown) | HO-TATGACCATGATTAGGCCAAG<br>CTTGTTAACAGGGGTGTCGCC<br>CTGGGCAGGATCCCCGGGTAC<br>CG  |
| Oligo-030 | Cy5-labeled dsDNA mismatch cleavage assay | Reverse PCR primes for cy5-labeled dsDNA target amplification and mismatch cleavage assay with mismatch at position 18 (brown) | HO-TATGACCATGATTAGGCCAAG<br>CTTGTCACCAGGGGTGTCGCC<br>CTGGGCAGGATCCCCGGGTAC<br>CG  |
| Oligo-031 | Cy5-labeled dsDNA mismatch cleavage assay | Reverse PCR primes for cy5-labeled dsDNA target amplification and mismatch cleavage assay with mismatch at position 19 (brown) | HO-TATGACCATGATTAGGCCAAG<br>CTTGTCACCAGGGGTGTCGCC<br>CTGGGCAGGATCCCCGGGTAC<br>CG  |

|           |                                                                                                                                                |                                                                                                                                 |                                                                                                                                                                               |
|-----------|------------------------------------------------------------------------------------------------------------------------------------------------|---------------------------------------------------------------------------------------------------------------------------------|-------------------------------------------------------------------------------------------------------------------------------------------------------------------------------|
| Oligo-032 | Cy5-labeled dsDNA mismatch cleavage assay                                                                                                      | Reverse PCR primers for cy5-labeled dsDNA target amplification and mismatch cleavage assay with mismatch at position 20 (brown) | HO-TATGACCATGATTAGGCCAAGCTTCTTCACCAGGGTGTCCGCTGGGCAGGATCCCCGGGTACCG                                                                                                           |
| RNA-001   | <i>In vitro</i> plasmids cleavage                                                                                                              | crRNA containing target spacer (red) of Cas $\pi$ -1                                                                            | ACACUCUAAAGGAAUGAAAGAGGGCGACACCCUGGUGAAC                                                                                                                                      |
| RNA -002  | <i>In vitro</i> plasmids cleavage                                                                                                              | crRNA containing target spacer (red) of Cas $\pi$ -2                                                                            | AACGCUCUUAGGGAAUGAAAGAAGGGCGACACCCUGGUGAAC                                                                                                                                    |
| RNA -003  | <i>In vitro</i> plasmids cleavage                                                                                                              | tracrRNA sequence of Cas $\pi$ -1                                                                                               | GUCUGCCGAAGACGCCGCACGGAGCCUGGGCCGAAUCGUAGAUCGAACGCGGCAUCGAAGCCCUGCAGCCCUUCGGGGCCAAGGCGGCGCAGCAAGCCUCUUUCAGGGCGCAGAGUCCUUUAGAGUGU                                              |
| RNA -004  | <i>In vitro</i> plasmids cleavage                                                                                                              | tracrRNA sequence of Cas $\pi$ -2                                                                                               | GUCUCGACUAUGCCGUACCACUAGACCGAGCCUACACGGCACGGGUCAUAGCGUUAACCAAGGCGUGGUGACAAGCCUCUUUCAGGGCAGCGGACACUUAAGAGCGUU                                                                  |
| RNA -005  | <i>In vitro</i> plasmids cleavage, cy5-labeled dsDNA cleavage, cleavage sites determination, <i>trans</i> -cleavage and complex reconstitution | sgRNA joint by tracrRNA and crRNA, which contained target spacer (red), with GAGAG loop (green) of Cas $\pi$ -1                 | GUCUGCCGAAGACGCCGCACGGAGCCUGGGCCGAAUCGUAGAUCGAACGCGGCAUCGAAGCCCUGCAGCCCUUCGGGGCCAAGGCGGCGCAGCAAGCCUCUUUCAGGGCGCAGAGUCCUUUAGAGUGUGAGAGACACUCUAAAGGAAUGAAAGAGGGCGACACCCUGGUGAAC |
| RNA -006  | <i>In vitro</i> plasmids cleavage, cy5-labeled dsDNA cleavage, cleavage sites determination, <i>trans</i> -cleavage and complex reconstitution | sgRNA joint by tracrRNA and crRNA, which contained target spacer (red), with GAGAG loop (green) of Cas $\pi$ -2                 | GUCUCGACUAUGCCGUACCACUAGACCGAGCCUACACGGCACGGGUCAUAGCGUUAACCAAGGCGUGGUGACAAGCCUCUUUCAGGGCAGCGGACACUUAAGAGCGUUGAGAGAACGCUCUUAGGGAAUGAAGAGGGCGACACCCUGGUGAAC                     |
| RNA -007  | <i>In vitro</i> plasmids cleavage, cy5-labeled dsDNA cleavage, 12nt                                                                            | sgRNA joint by tracrRNA and crRNA, which contained target spacer (red), with GAGAG loop                                         | GUCUGCCGAAGACGCCGCACGGAGCCUGGGCCGAAUCGUAGAUCGAACGCGGCAUCGAAGCCCUGCAGCCCUUCGGGGCCAAGGCGG                                                                                       |

|             |                                                                                           |                                                                                                                                                |                                                                                                                                                                                |
|-------------|-------------------------------------------------------------------------------------------|------------------------------------------------------------------------------------------------------------------------------------------------|--------------------------------------------------------------------------------------------------------------------------------------------------------------------------------|
|             | truncated A-II region                                                                     | (green) and 12nt truncated A-II region of Cas $\pi$ -1                                                                                         | CGCAGCAAGCCUCUUUCAGGGC<br>GCAGAGUCCUUUAGAGAGUAAA<br>GGAAUGAAAGAGGGCGACACCC<br>UGGUGAAC                                                                                         |
| RNA - 008   | <i>In vitro</i> plasmids cleavage, cy5-labeled dsDNA cleavage, 24nt truncated A-II region | sgRNA joint by tracrRNA and crRNA, which contained target spacer (red), with GAGAG loop (green) and 24nt truncated A-II region of Cas $\pi$ -1 | GUCUGCCGAAGACGCCGCACGG<br>AGCCUGGGCCGGAAUCGUAGAU<br>CGAACGCGGCAUCGAAGCCUCG<br>CAGCCCUUCGGGGCCAAGGCGG<br>CGCAGCAAGCCUCUUUCAGGGC<br>GCAGAGUGAGAGAAUGAAAG<br>AGGGCGACACCCUGGUGAAC |
| RNA - 009   | <i>In vitro</i> cy5-labeled dsDNA cleavage, and <i>trans</i> -cleavage                    | sgRNA of LbCas12a, which contained target spacer (red)                                                                                         | GAGAUUUCUACUCUUGUAGAU<br>GGGGCGACACCCUGGUGAAC                                                                                                                                  |
| $\pi$ -sg1  | Cell genome editing                                                                       | <i>EGFP</i> gene target 1 of Cas $\pi$ , PAM of the targets: CCT                                                                               | CTGCTCAGGTGGAGATGAAC                                                                                                                                                           |
| $\pi$ -sg2  | Cell genome editing                                                                       | <i>EGFP</i> gene target 2 of Cas $\pi$ , PAM of the targets: CCC                                                                               | GCTTCTTGTTTCATCTCCACC                                                                                                                                                          |
| $\pi$ -sg3  | Cell genome editing                                                                       | <i>EGFP</i> gene target 3 of Cas $\pi$ , PAM of the targets: CCC                                                                               | GAGCTCAGCCACACTGTCCG                                                                                                                                                           |
| $\pi$ -sg4  | Cell genome editing                                                                       | <i>EGFP</i> gene target 4 of Cas $\pi$ , PAM of the targets: CCC                                                                               | CGAGCTCAGCCACACTGTCC                                                                                                                                                           |
| $\pi$ -sg5  | Cell genome editing                                                                       | <i>EGFP</i> gene target 5 of Cas $\pi$ , PAM of the targets: CCT                                                                               | TCTCCAGCTTCTGCTTCACC                                                                                                                                                           |
| $\pi$ -dest | Cell genome editing                                                                       | <i>EGFP</i> gene non-target of Cas $\pi$ ,                                                                                                     | GGAAGAGCGAGCTCTTCC                                                                                                                                                             |
| 12a-sg1     | Cell genome editing                                                                       | <i>EGFP</i> gene target 1 of Cas12a, PAM of the targets: TTTC                                                                                  | CCGCTTCTTGTTTCATCTCCA                                                                                                                                                          |
| 12a-sg2     | Cell genome editing                                                                       | <i>EGFP</i> gene target 2 of Cas12a, PAM of the targets: TTTC                                                                                  | TGAAACTCAGTTTCCCGCTT                                                                                                                                                           |
| 12a-sg3     | Cell genome editing                                                                       | <i>EGFP</i> gene target 3 of Cas12a, PAM of the targets: CTTC                                                                                  | TTCCGAAGAGCGGCTGCTGT                                                                                                                                                           |
| 12a-sg4     | Cell genome editing                                                                       | <i>EGFP</i> gene target 4 of Cas12a, PAM of the targets: CTTC                                                                                  | GGAAGAAGCACGCGGACAGT                                                                                                                                                           |
| 12a-sg5     | Cell genome editing                                                                       | <i>EGFP</i> gene target 5 of Cas12a, PAM of the targets: CTTC                                                                                  | TCCTTCTCCAGCTTCTGCTT                                                                                                                                                           |
| 12a-dest    | Cell genome editing                                                                       | <i>EGFP</i> gene non-target of Cas12a                                                                                                          | GGAAGAGCGAGCTCTTCC                                                                                                                                                             |
| Cas9-sg1    | Cell genome editing                                                                       | <i>EGFP</i> gene target 1 of SpyCas9, PAM of the targets: AGG                                                                                  | GTTTCATCTCCACCTGAGCAG                                                                                                                                                          |
| Cas9-sg2    | Cell genome editing                                                                       | <i>EGFP</i> gene target 2 of SpyCas9, PAM of the targets: GGG                                                                                  | GGTGGAGATGAACAAGAAGC                                                                                                                                                           |

|                |                                 |                                                                  |                        |
|----------------|---------------------------------|------------------------------------------------------------------|------------------------|
| Cas9-sg3       | Cell genome editing             | <i>EGFP</i> gene target 3 of SpyCas9, PAM of the targets: GGG    | CGGACAGTGTGGCTGAGCTC   |
| Cas9-sg4       | Cell genome editing             | <i>EGFP</i> gene target 4 of SpyCas9, PAM of the targets: GGG    | GGACAGTGTGGCTGAGCTCG   |
| Cas9-sg5       | Cell genome editing             | <i>EGFP</i> gene target 5 of SpyCas9, PAM of the targets: AGG    | GGTGAAGCAGAAGCTGGAGA   |
| Cas9-dest      | Cell genome editing             | <i>EGFP</i> gene non-target of SpyCas9                           | GGAAGAGCGAGCTCTTCC     |
| ccdB-T         | Bacterial plasmids interference | <i>ccdB</i> gene target of Cas $\pi$                             | CGATAACGGAGACCGGCACA   |
| CcdB-dest      | Bacterial plasmids interference | <i>ccdB</i> gene non-target of Cas $\pi$                         | GGAAGAGCGAGCTCTTCC     |
| <i>B2M</i> -1  | Cell genome editing             | <i>B2M</i> gene target 1 of Cas $\pi$ , PAM of the targets: CCC  | GATATTCCTCAGGTACTIONCA |
| <i>B2M</i> -2  | Cell genome editing             | <i>B2M</i> gene target 2 of Cas $\pi$ , PAM of the targets: CCT  | GAATCTTTGGAGTACCTGAG   |
| <i>TP53</i> -1 | Cell genome editing             | <i>TP53</i> gene target 1 of Cas $\pi$ , PAM of the targets: CCC | ACCATGAGCGCTGCTCAGAT   |
