# Supplementary material
Source: PubMed Central journal article supplement (PMC9977741)
Supplement: 41422_2022_771_MOESM17_ESM.pdf [file 41422_2022_771_MOESM17_ESM.pdf]

**Table S6. Statistics for cryo-EM analysis and model refinement.**

|                                                  |                                       |
|--------------------------------------------------|---------------------------------------|
|                                                  | Case                                  |
| PDB ID                                           | 7YOJ                                  |
| EMDB ID                                          | EMD-33983                             |
| <b>Data collection and processing</b>            |                                       |
| Microscope                                       | Titan Krios                           |
| Detector                                         | Gatan K3 with GIF Quantum (20eV slit) |
| CS (mm)                                          | 0.01                                  |
| Magnification                                    | 81K                                   |
| Pixel size (Å)                                   | 0.856                                 |
| Electron dose (e <sup>-</sup> / Å <sup>2</sup> ) | 50(32 frames)                         |
| Defocus range (µm)                               | -1.5 ~ -2.0                           |
| Micrographs collected                            | 6,690                                 |
| Micrographs used                                 | 6,690                                 |
| <b>Reconstruction</b>                            |                                       |
| Software                                         | RELION-3.1, cryoSPARC-3.3.1           |
| Particles picked                                 | 2,544,599                             |
| Particles refinement                             | 39,500                                |
| Symmetry                                         | C1                                    |
| Resolution (Å)                                   | 3.4                                   |
| Sharpening B-factor (Å <sup>2</sup> )            | 111.3                                 |
| <b>Refinement</b>                                |                                       |
| Software                                         | PHENIX-1.20.1                         |
| Model composition                                |                                       |
| Number of atoms                                  | 11,545                                |
| Protein residues                                 | 867                                   |
| Nucleotides                                      | 216                                   |
| Ligand                                           | 0/0                                   |
| B factors (Protein/Nucleotide/Ligand)            | 113.04/191.67/0                       |
| Bonds RMSD                                       |                                       |
| Bonds lengths (Å)                                | 0.004                                 |
| Bonds angles (°)                                 | 0.681                                 |
| <b>Validation</b>                                |                                       |
| MolProbity score                                 | 2.02                                  |
| Clash score                                      | 8                                     |
| Rotamer outliers (%)                             | 0.27                                  |
| C-beta outliers (%)                              | 0.00                                  |
| Ramachandran plot                                |                                       |
| Favored (%)                                      | 94%                                   |
| Allowed (%)                                      | 6%                                    |
| Outlier (%)                                      | 0                                     |
| Model vs. Data                                   |                                       |
| CC mask/box                                      | 0.82/0.78                             |
