# Supplementary material
Source: PubMed Central journal article supplement (PMC9977741)
Supplement: 41422_2022_771_MOESM19_ESM.pdf [file 41422_2022_771_MOESM19_ESM.pdf]

**Title and Legend for Supplementary Video**

**Video. S1. The cryo-EM reconstruction and atomic model of Cas $\pi$  R-loop complex.**

The protein domains, RNA elements and DNA target are presented and colored referring to Fig. 6 and Fig. 8.
