# Supplementary material
Source: PubMed Central journal article supplement (PMC9977741)
Supplement: 41422_2022_771_MOESM21_ESM.pdf [file 41422_2022_771_MOESM21_ESM.pdf]

### **Title and Legend for Supplementary Data**

**Data. S1. The alignment file of Cas $\pi$ (Cas12l) and other Cas12 superfamily sequences.**

4 Cas $\pi$  protein sequences are aligned to 534 other Cas12 superfamily sequences, referring to Fig. 1a and Supplementary information Fig. S1b.
